# Supplementary material for: Catalyst-free nucleophilic substitution of hydrogen in quinoline rings by acylethynylpyrroles: stereoselective synthesis of 2-(E-2-acylethenylpyrrolyl)quinolines
Source: Royal Society of Chemistry journal article supplement (doi:10.1039/d3nj04989b), 2023-11-29
Supplement: d3nj04989b1.pdf [file d3nj04989b1.pdf]

## Supplementary information

### Catalyst-free nucleophilic substitution of hydrogen in quinoline ring by acylethylnylpyrroles: a stereoselective synthesis of 2-(*E*-2-acylethylnylpyrrolyl)quinolines

Kseniya V. Belyaeva, Lina P. Nikitina, Ludmila A. Oparina, Veronika S. Saliy, Denis N. Tomilin, Anton V. Kuzmin, Andrei V. Afonin, and Boris A. Trofimov \*

*A. E. Favorsky Irkutsk Institute of Chemistry, Siberian Branch, Russian Academy of Sciences, 1 Favorsky Str., Irkutsk, 664033 Russian Federation; Fax: (395-2)41-93-46.  
[boris\\_trofimov@irioch.irk.ru](mailto:boris_trofimov@irioch.irk.ru)*

#### Table of contents

|                                                                                                                                   |                |
|-----------------------------------------------------------------------------------------------------------------------------------|----------------|
| <b><sup>1</sup>H, <sup>13</sup>C and <sup>19</sup>F spectra of compounds 3, 5 and 7</b>                                           | <b>S2-S22</b>  |
| <b>Cartesian coordinates, the number of imaginary frequencies, and computed total energies of target and optimized structures</b> | <b>S23-S45</b> |

# $^1\text{H}$ , $^{13}\text{C}$ and $^{19}\text{F}$ spectra of compounds 3 and 5

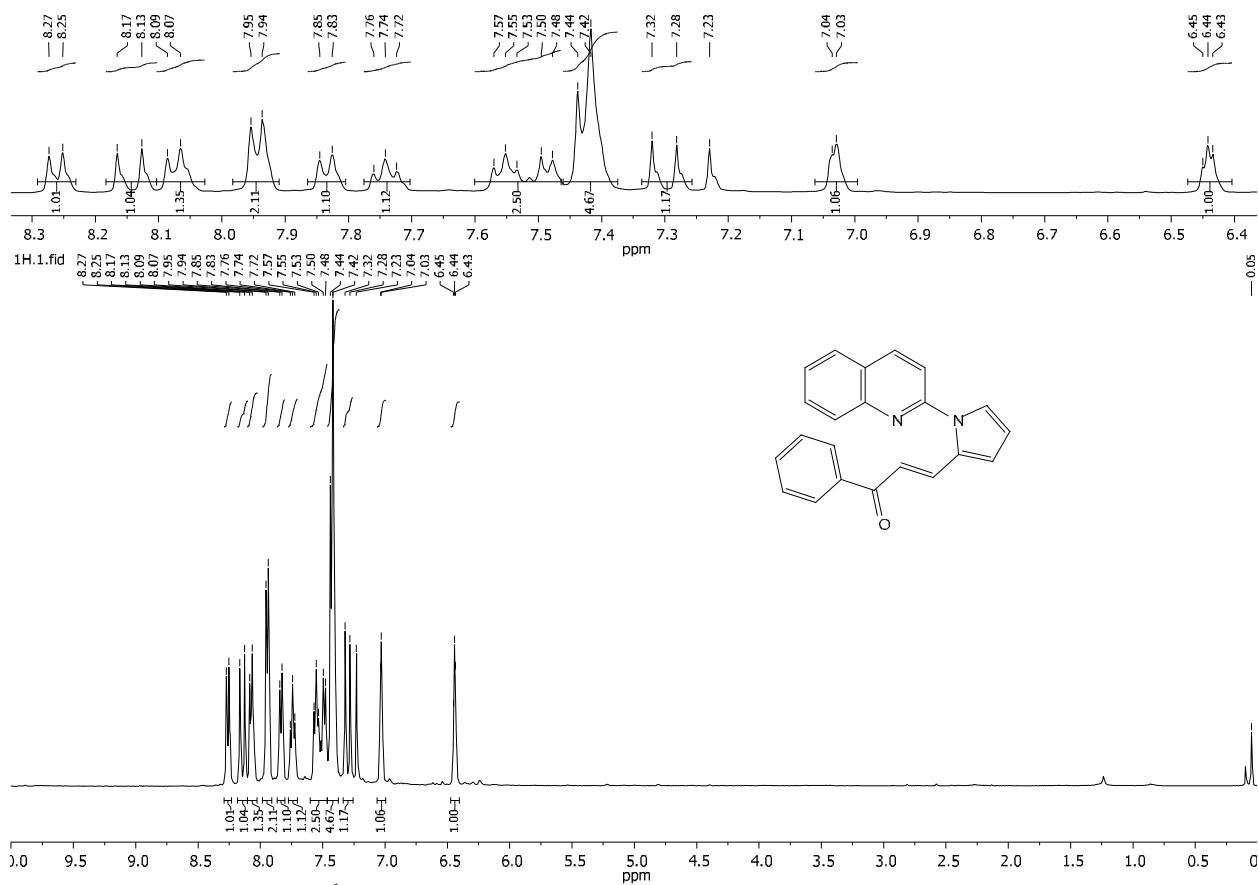

$^1\text{H}$  NMR spectrum of **3a** (400.13 MHz,  $\text{CDCl}_3$ )

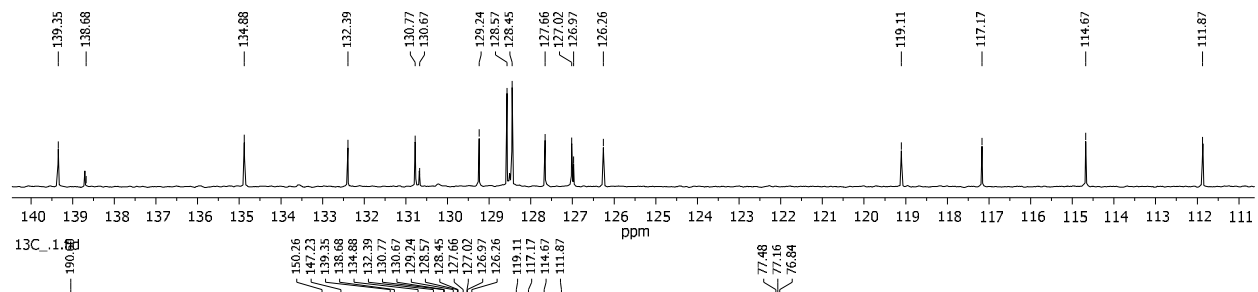

$^{13}\text{C}$  NMR spectrum of **3a** (100.62 MHz,  $\text{CDCl}_3$ )

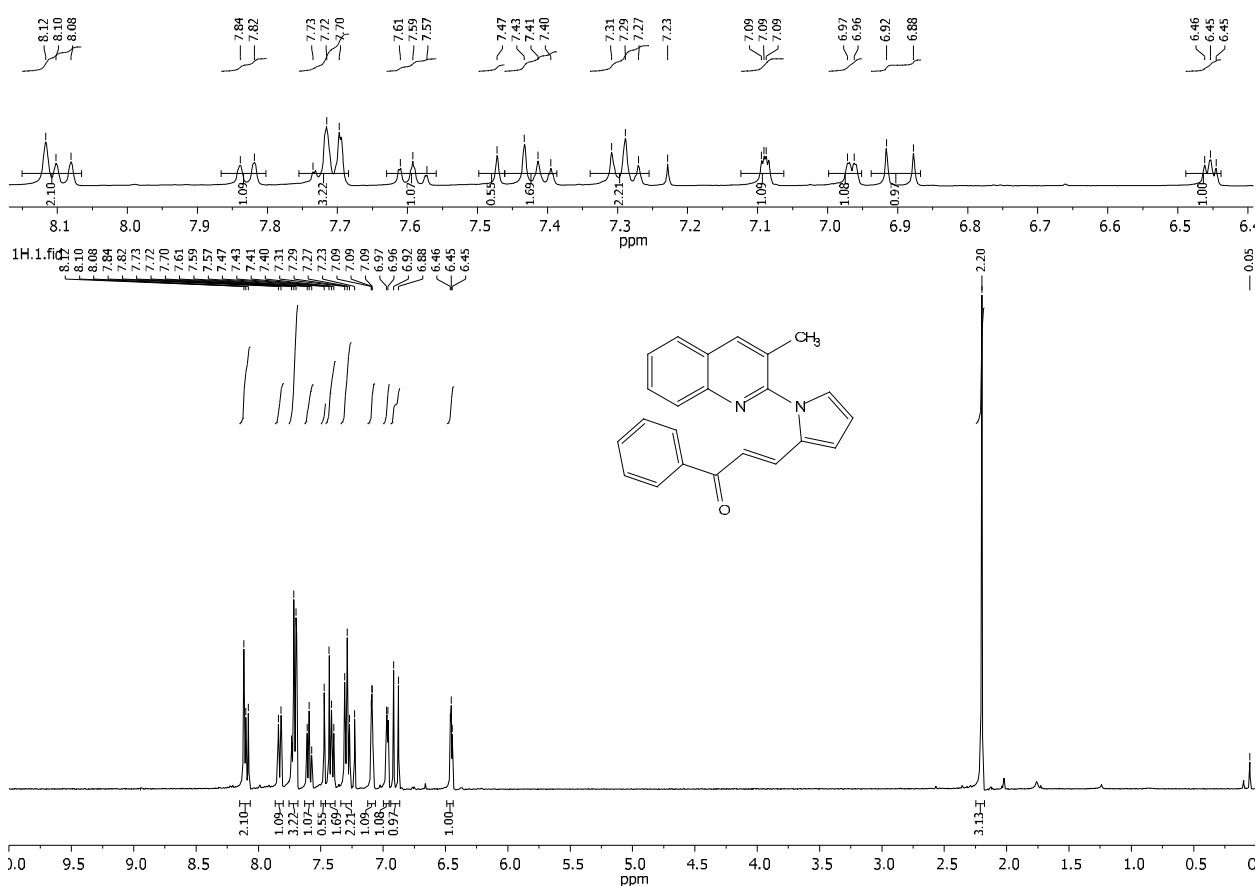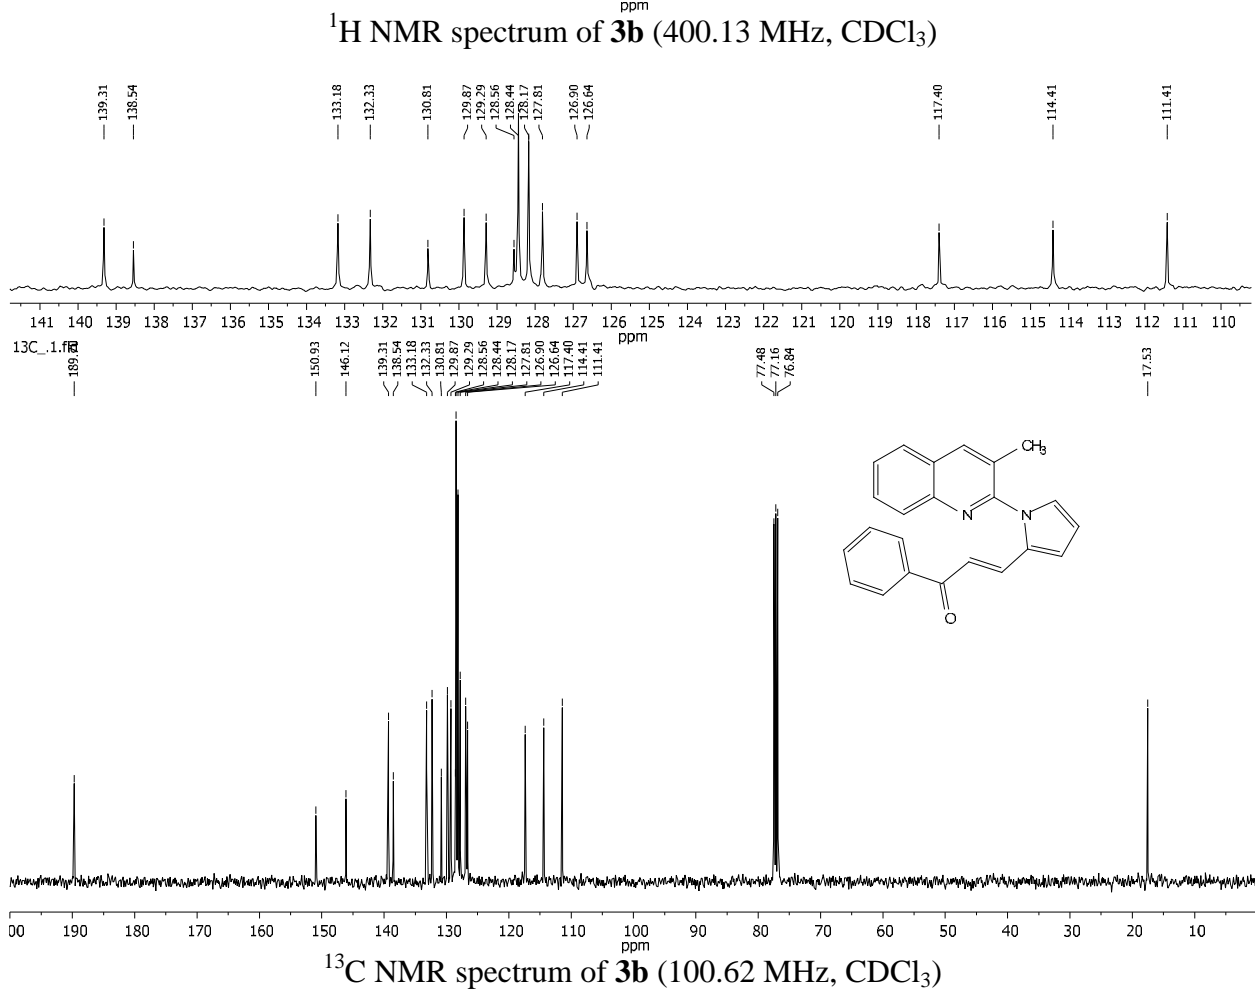

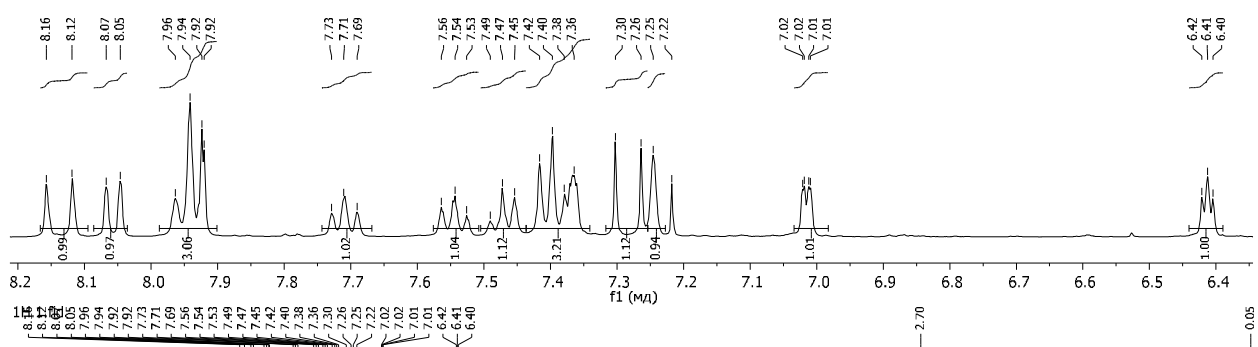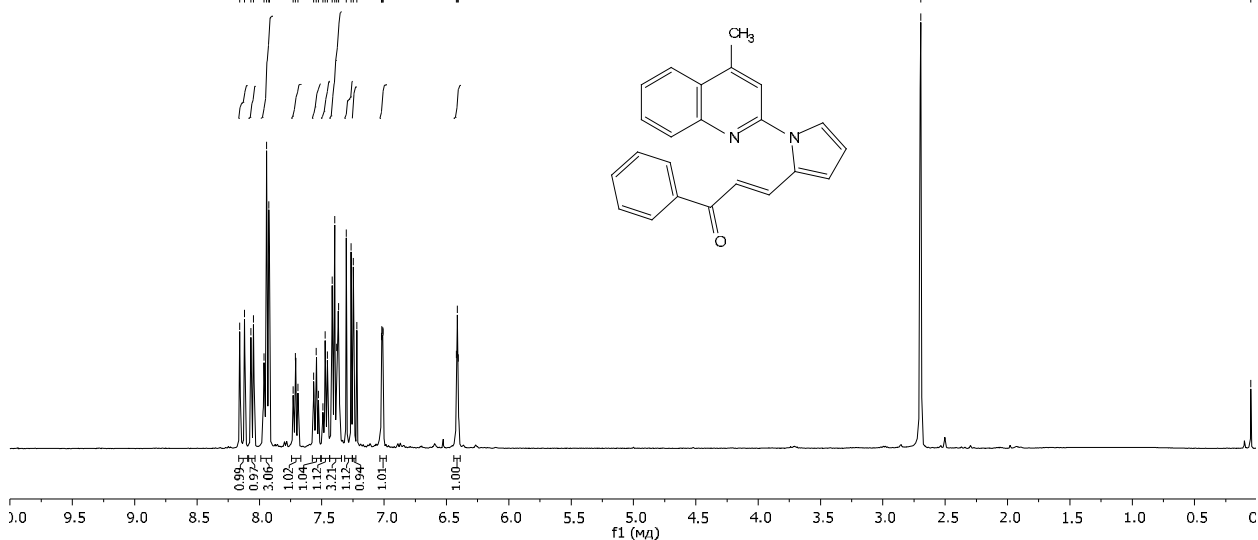

<sup>1</sup>H NMR spectrum of 3c (400.13 MHz, CDCl<sub>3</sub>)

<sup>13</sup>C NMR spectrum of 3c (100.62 MHz, CDCl<sub>3</sub>)

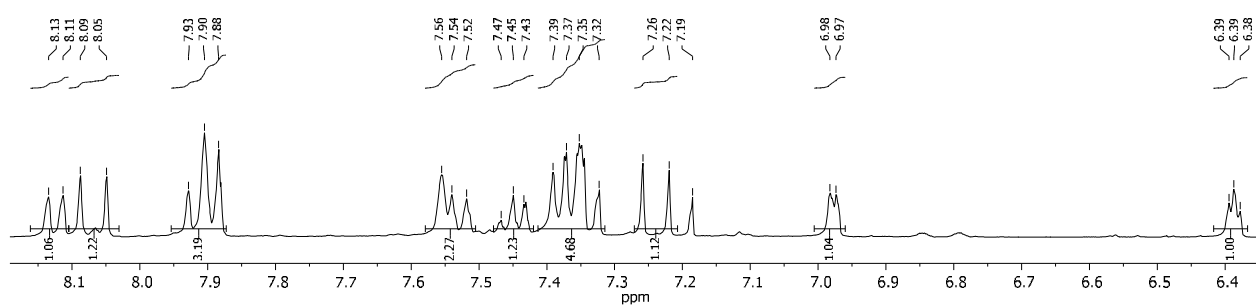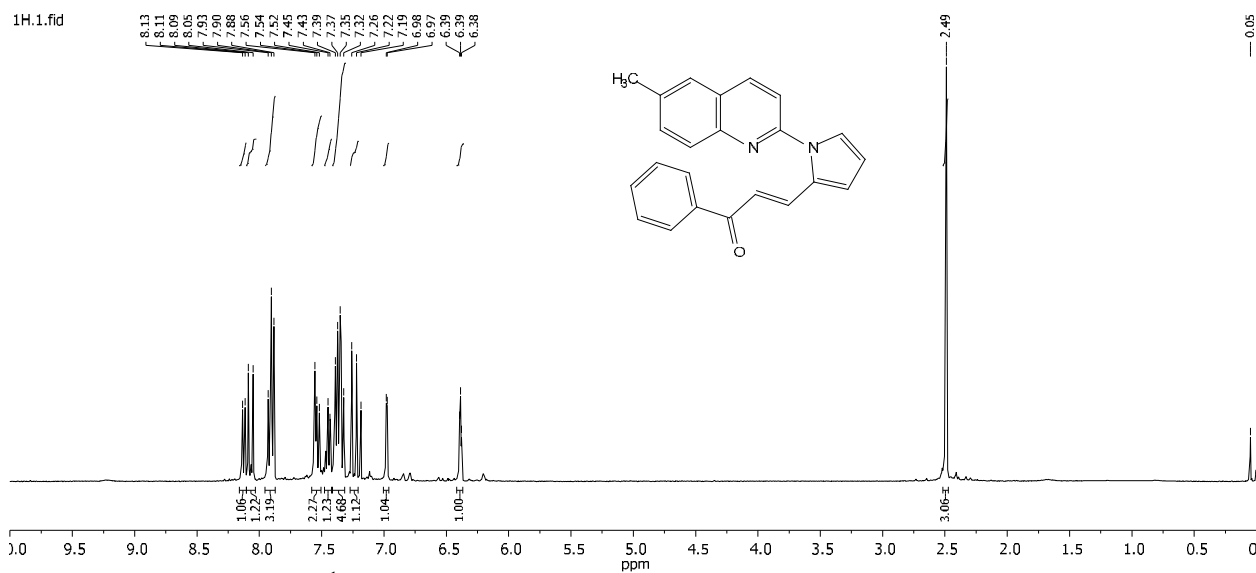

<sup>1</sup>H NMR spectrum of **3d** (400.13 MHz, CDCl<sub>3</sub>)

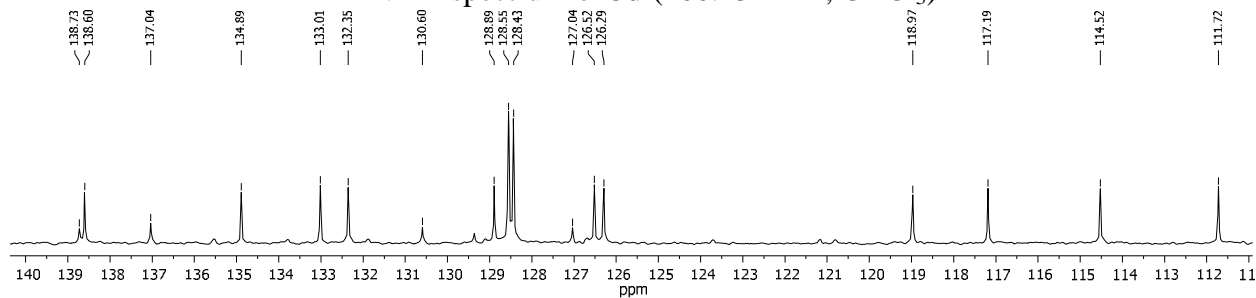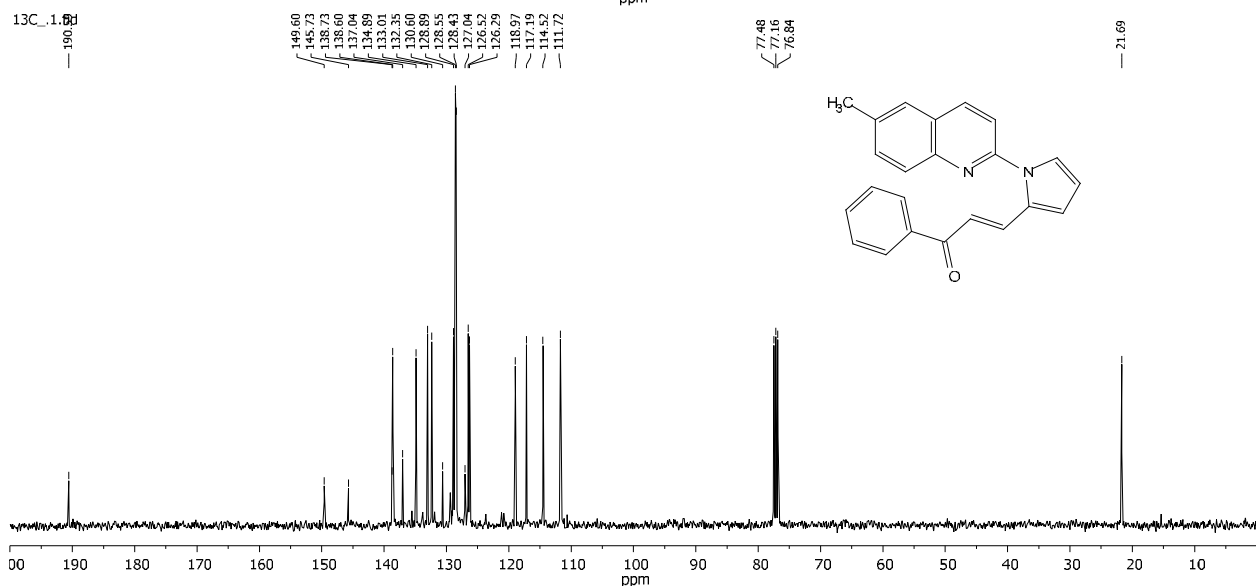

<sup>13</sup>C NMR spectrum of **3d** (100.62 MHz, CDCl<sub>3</sub>)

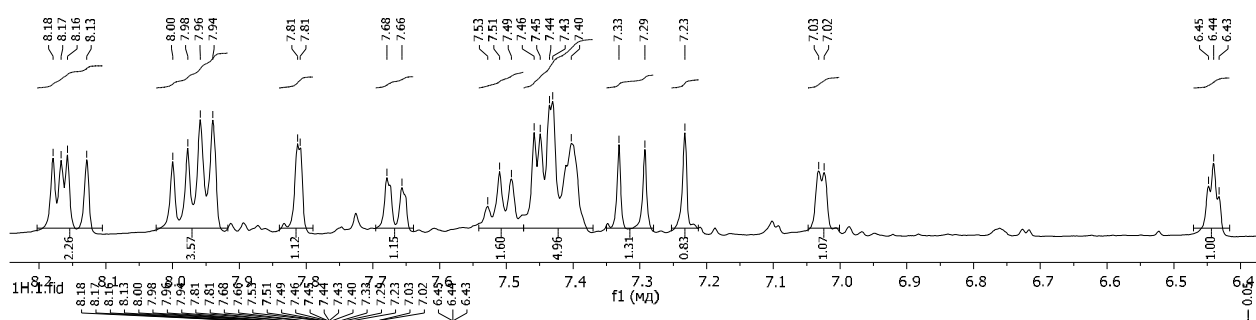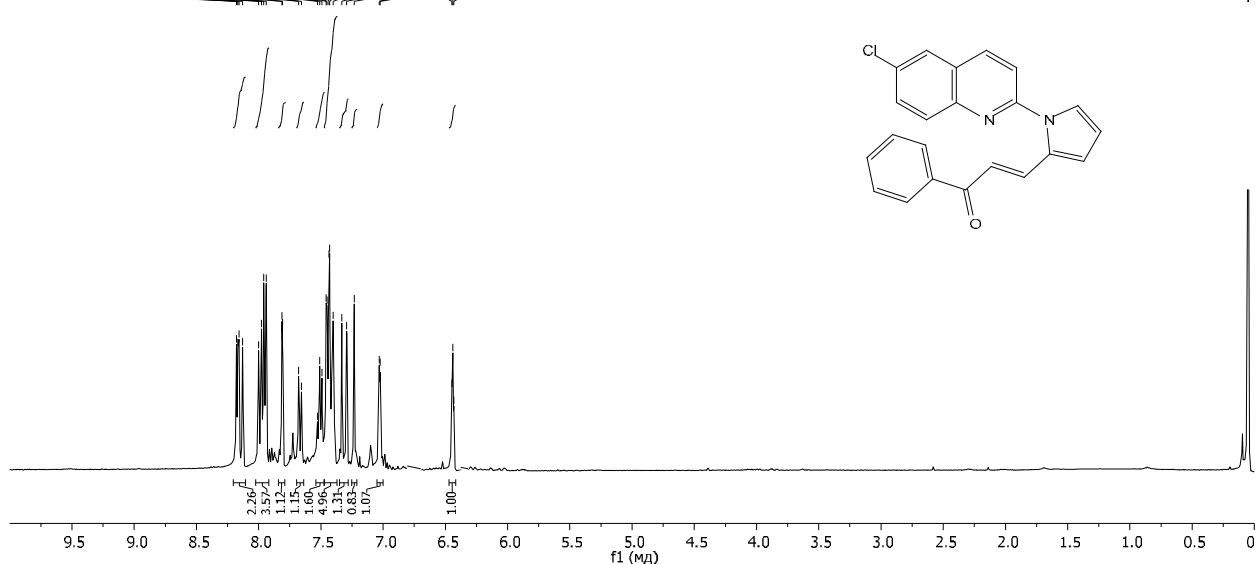

$^1\text{H}$  NMR spectrum of **3e** (400.13 MHz,  $\text{CDCl}_3$ )

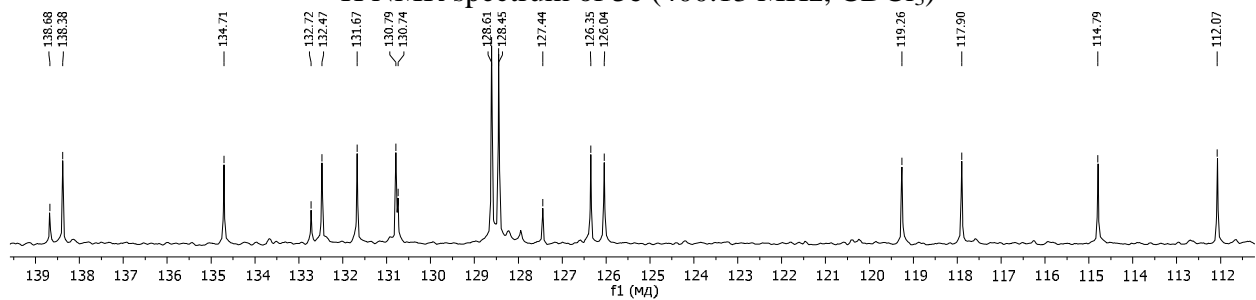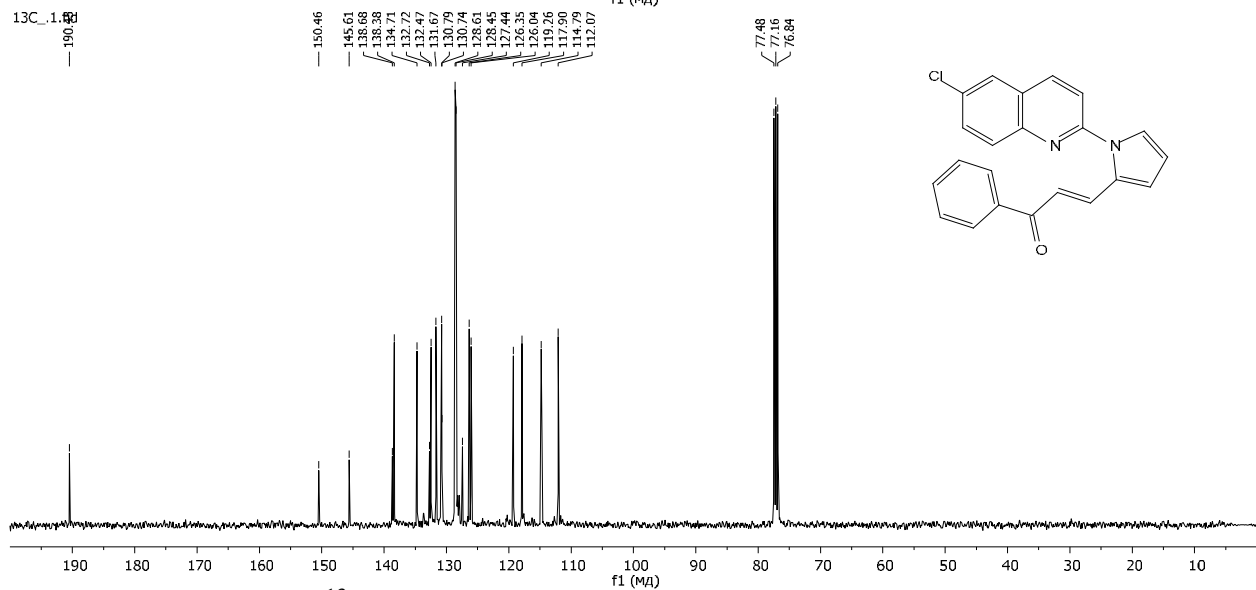

$^{13}\text{C}$  NMR spectrum of **3e** (100.62 MHz,  $\text{CDCl}_3$ )

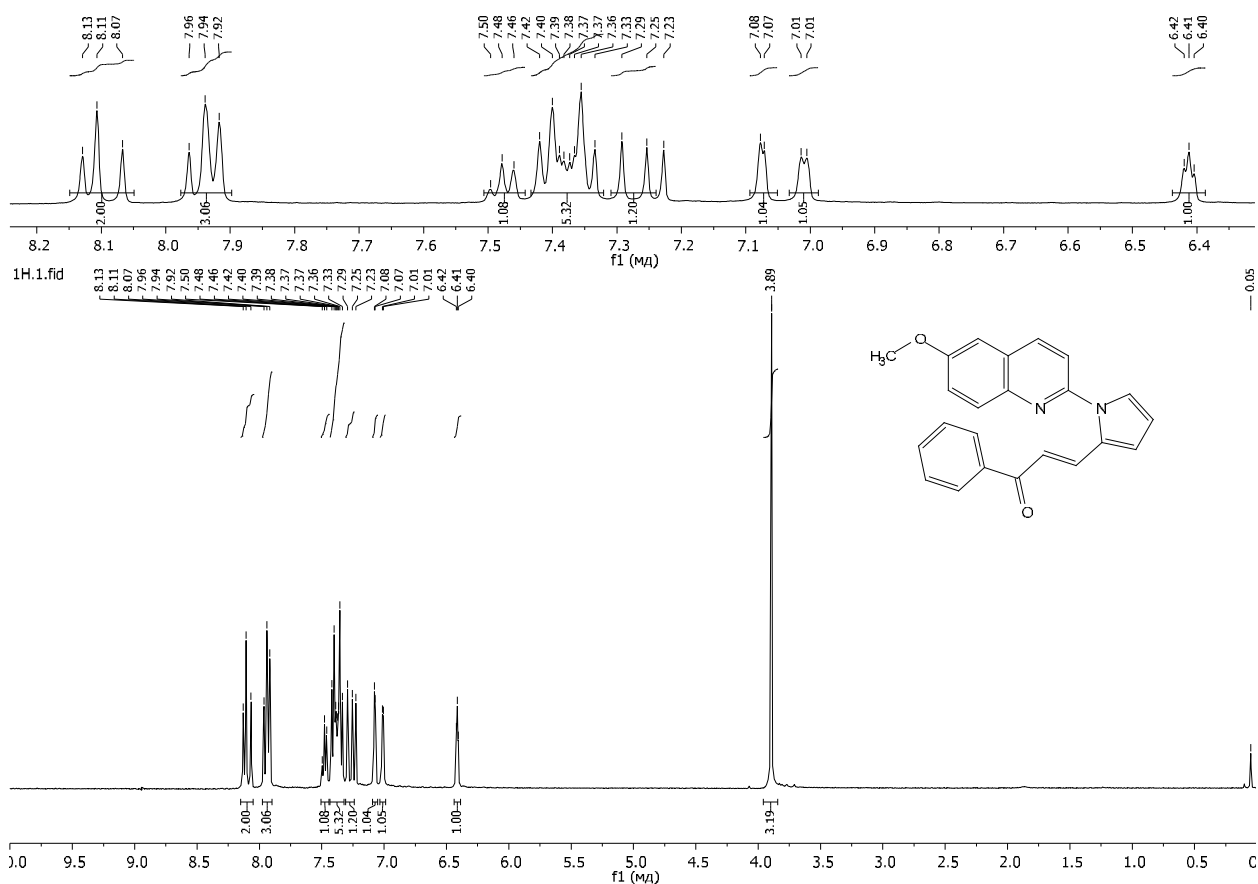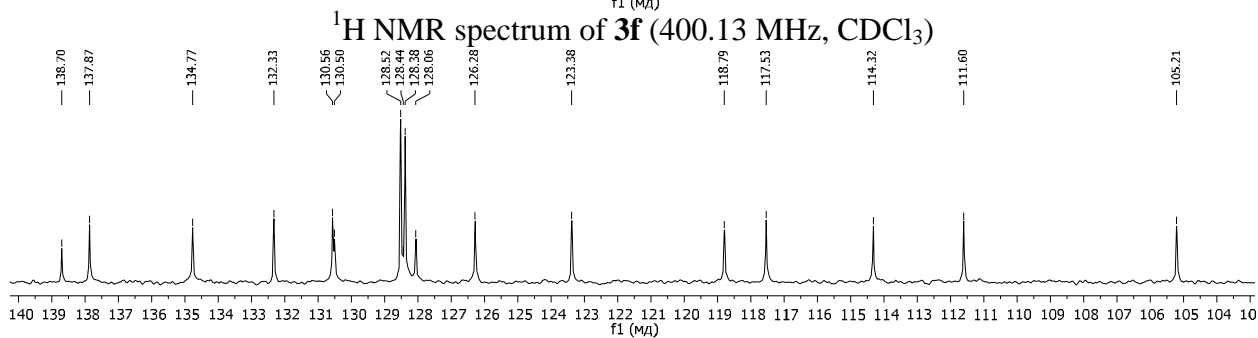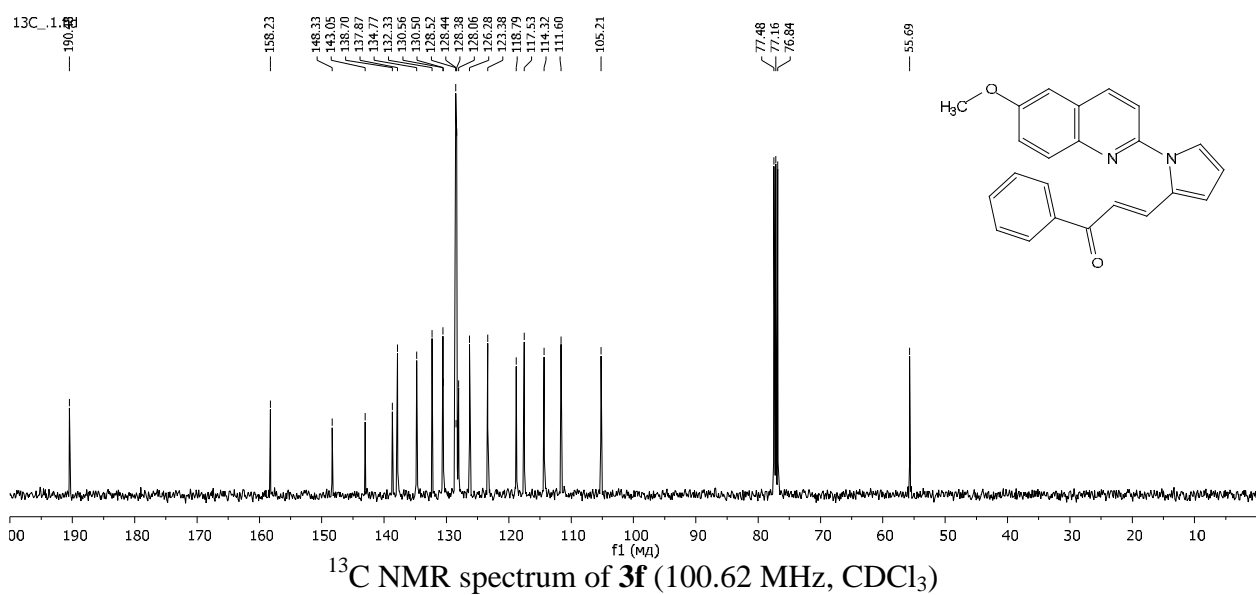

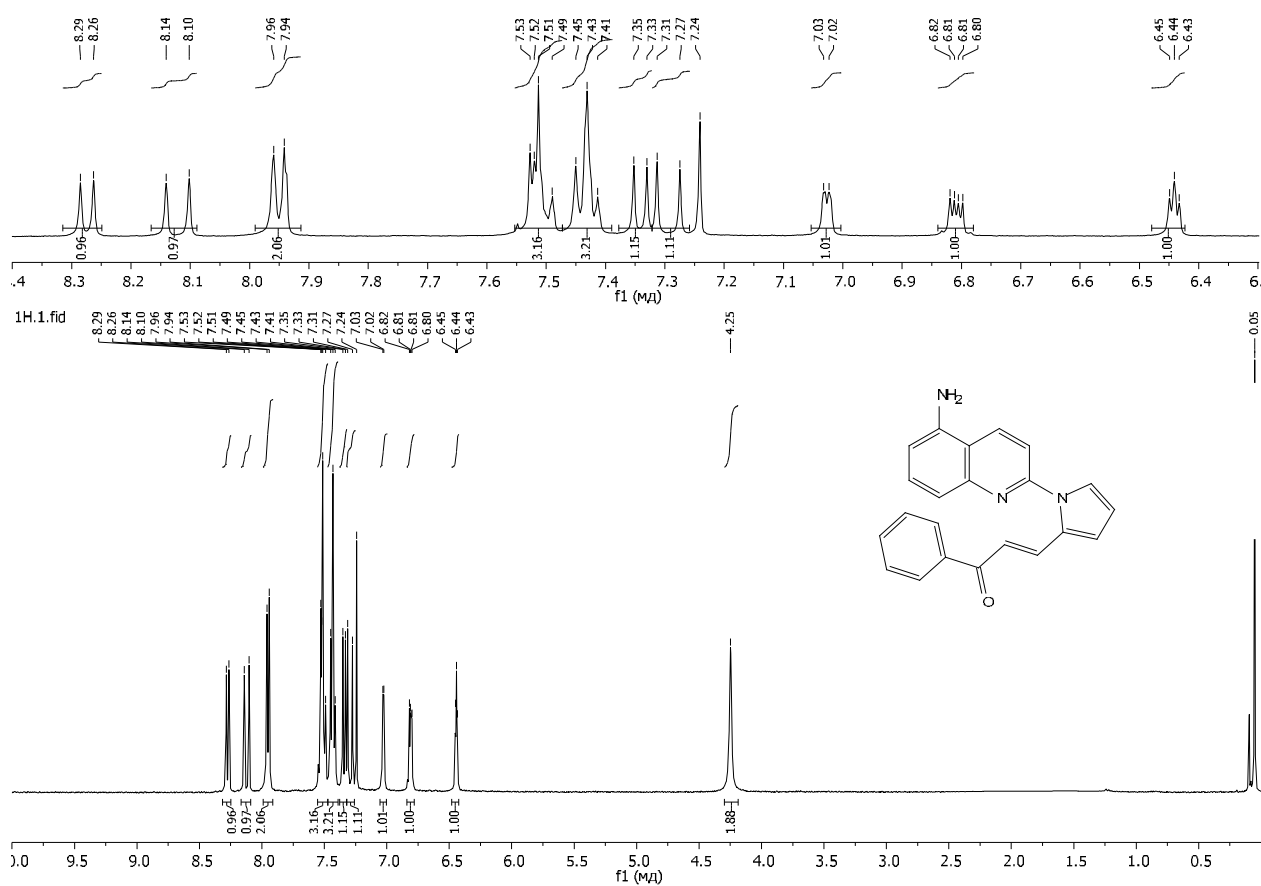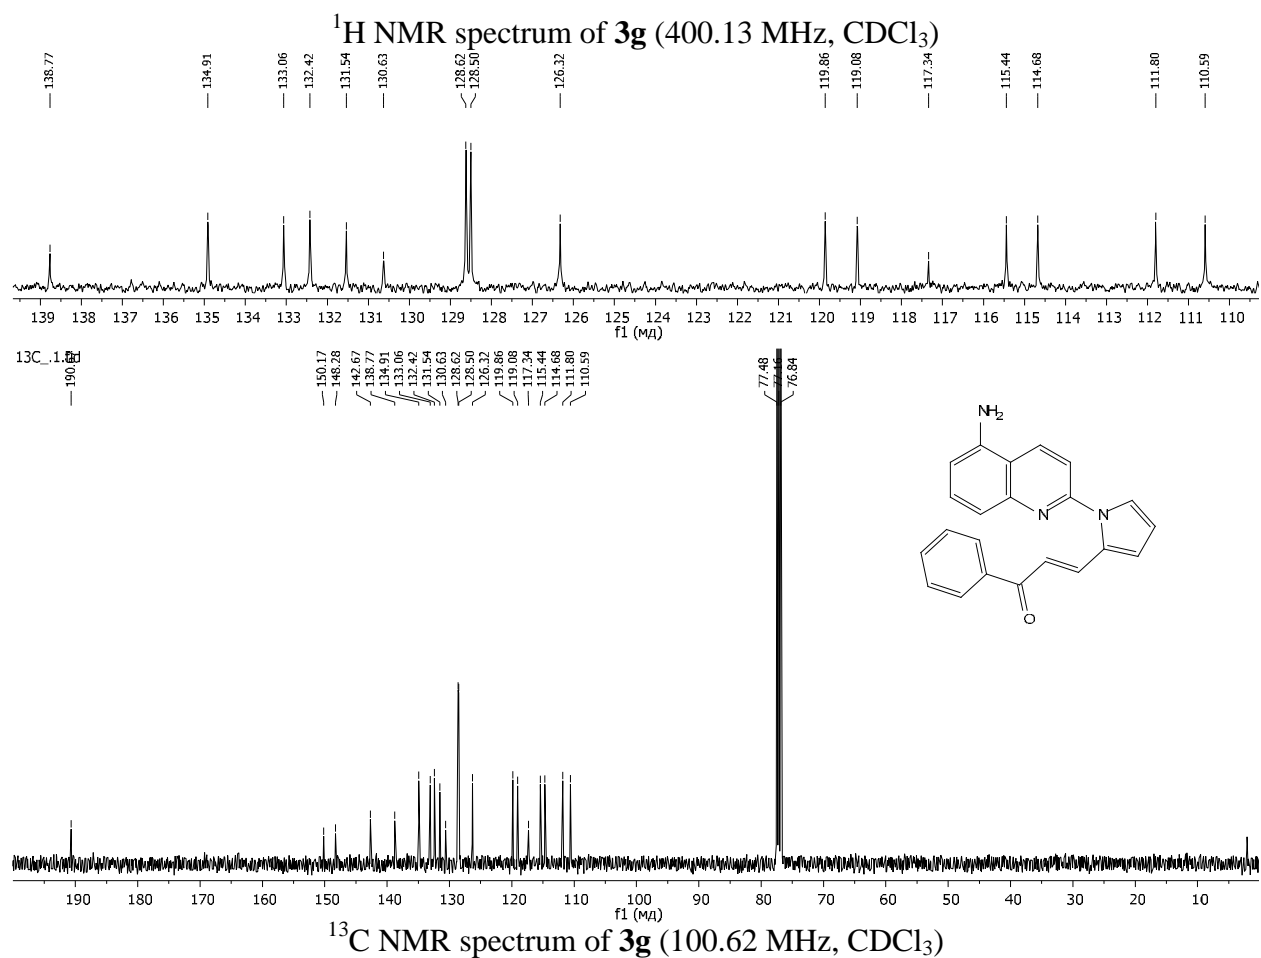



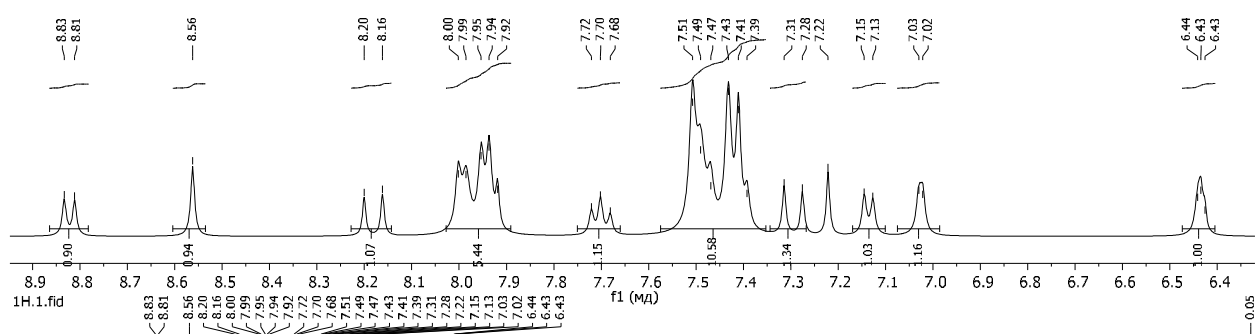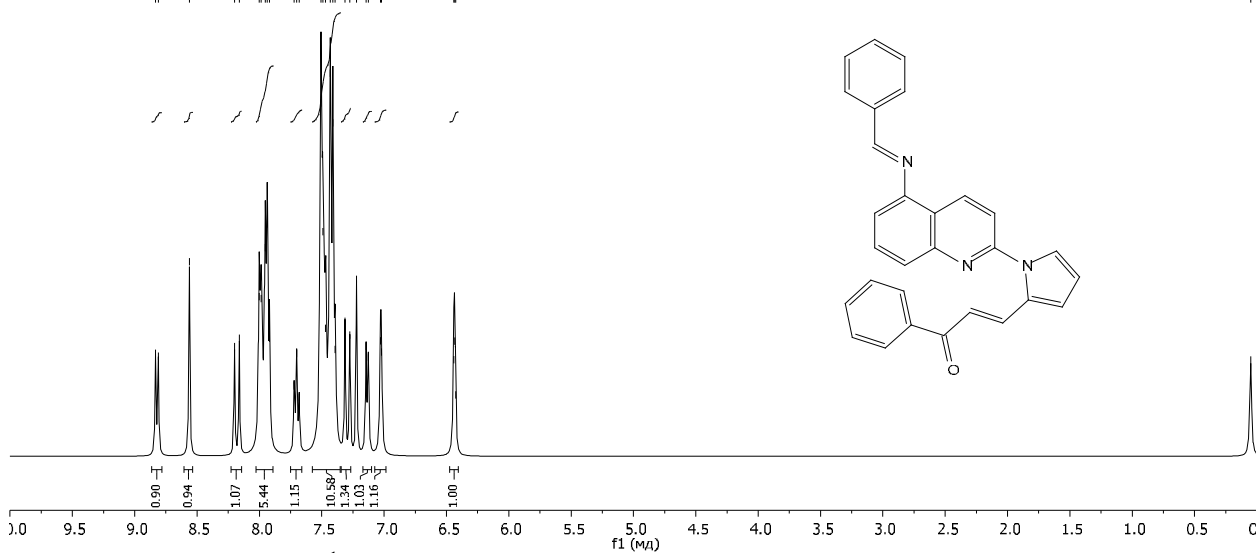

<sup>1</sup>H NMR spectrum of **3h** (400.13 MHz, CDCl<sub>3</sub>)

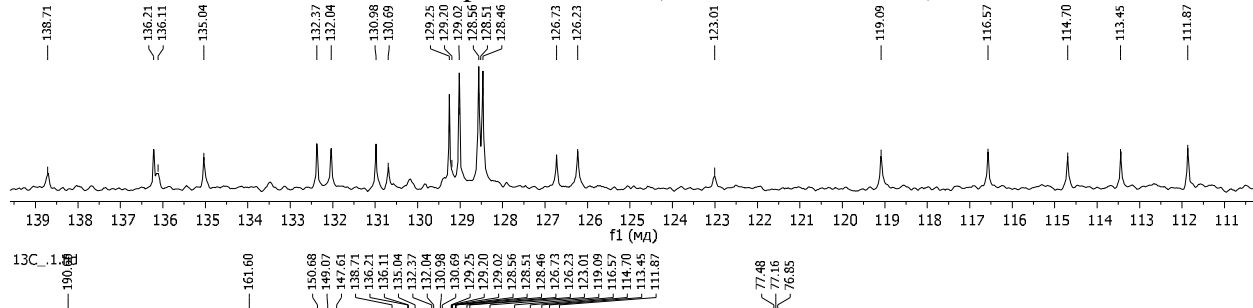

<sup>13</sup>C NMR spectrum of **3h** (100.62 MHz, CDCl<sub>3</sub>)

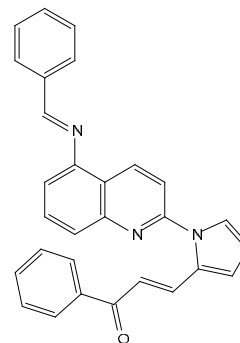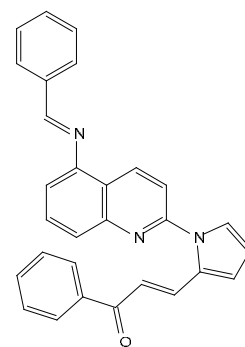

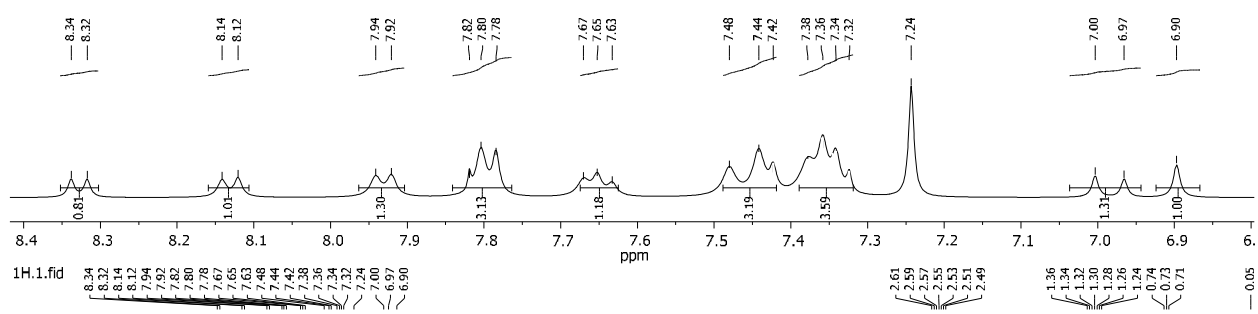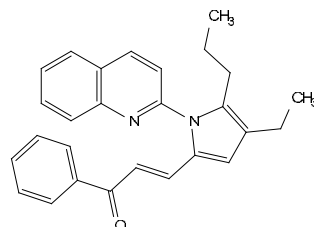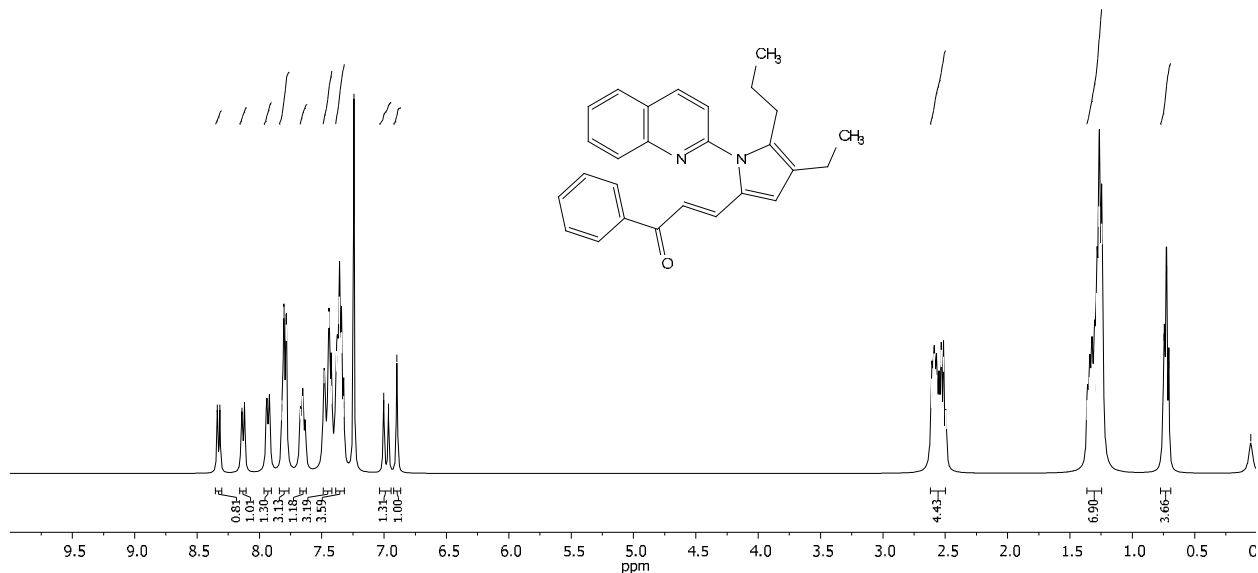

<sup>1</sup>H NMR spectrum of **3i** (400.13 MHz, CDCl<sub>3</sub>)

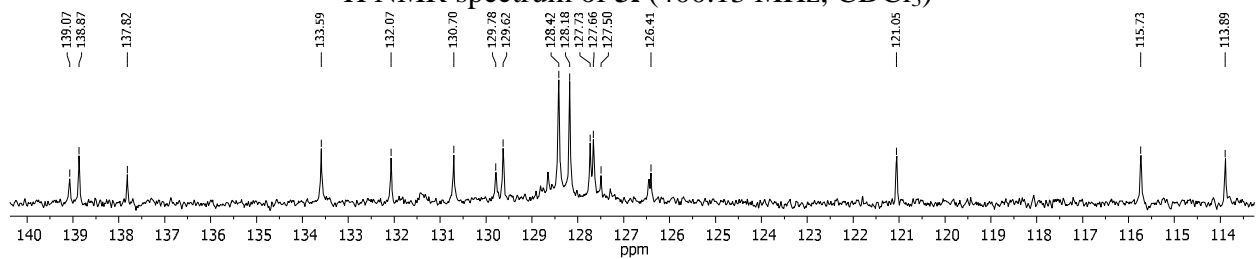

<sup>13</sup>C NMR spectrum of **3i** (100.62 MHz, CDCl<sub>3</sub>)

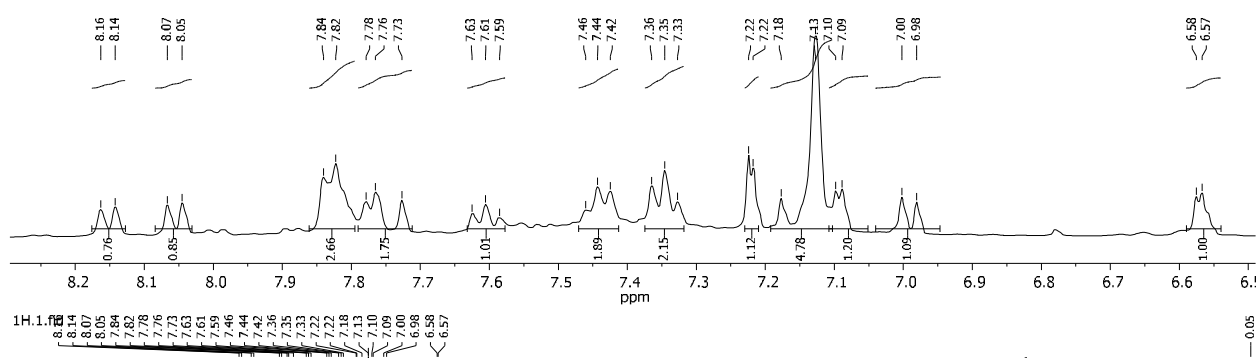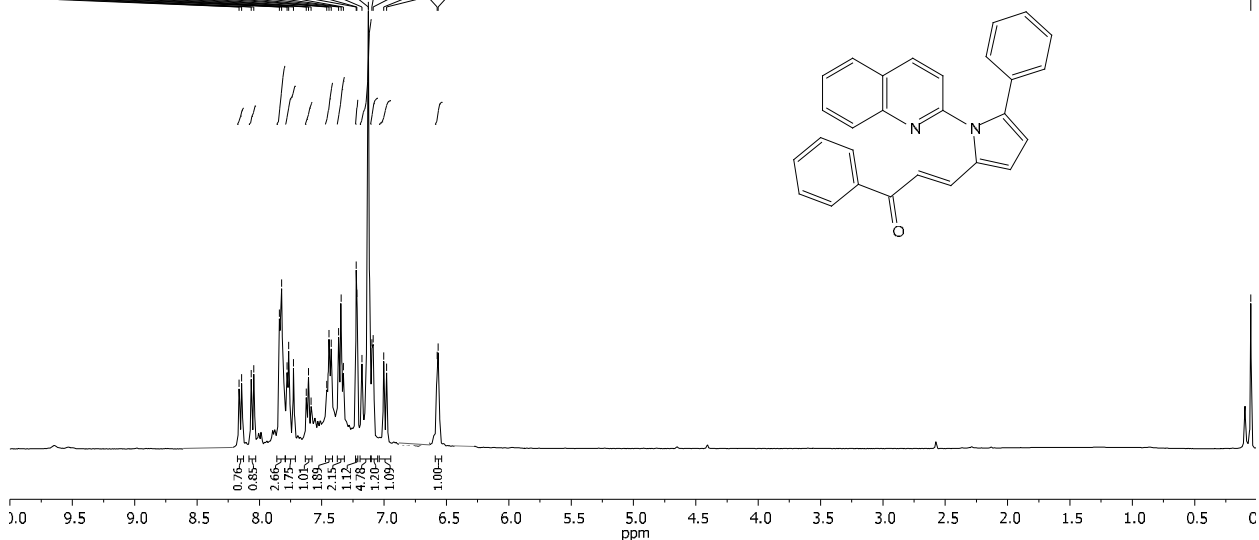

<sup>1</sup>H NMR spectrum of **3j** (400.13 MHz, CDCl<sub>3</sub>)

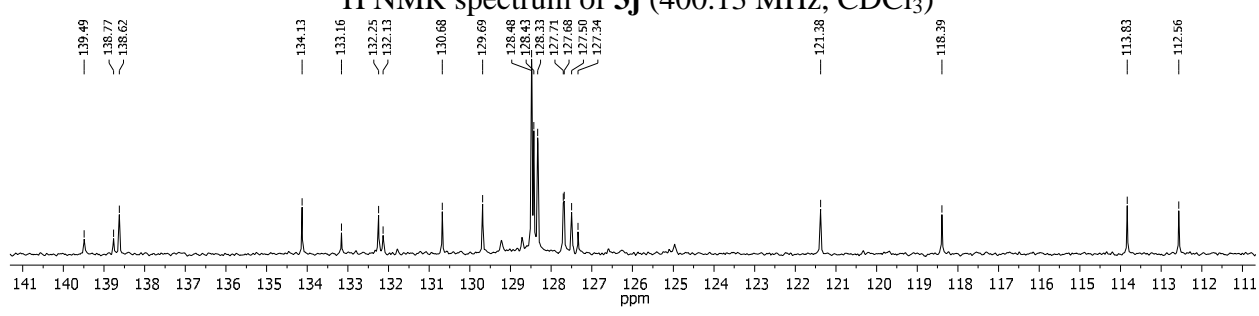

<sup>13</sup>C NMR spectrum of **3j** (100.62 MHz, CDCl<sub>3</sub>)

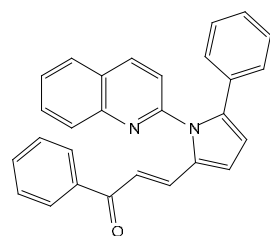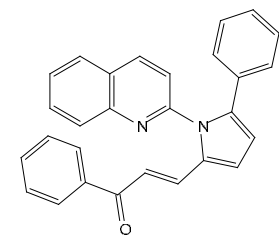

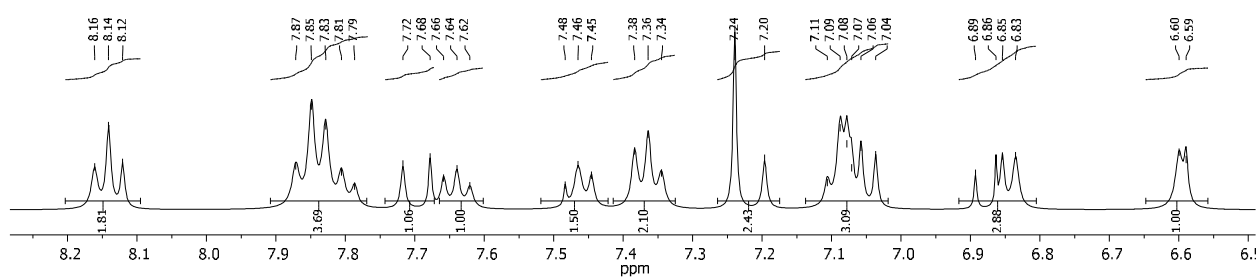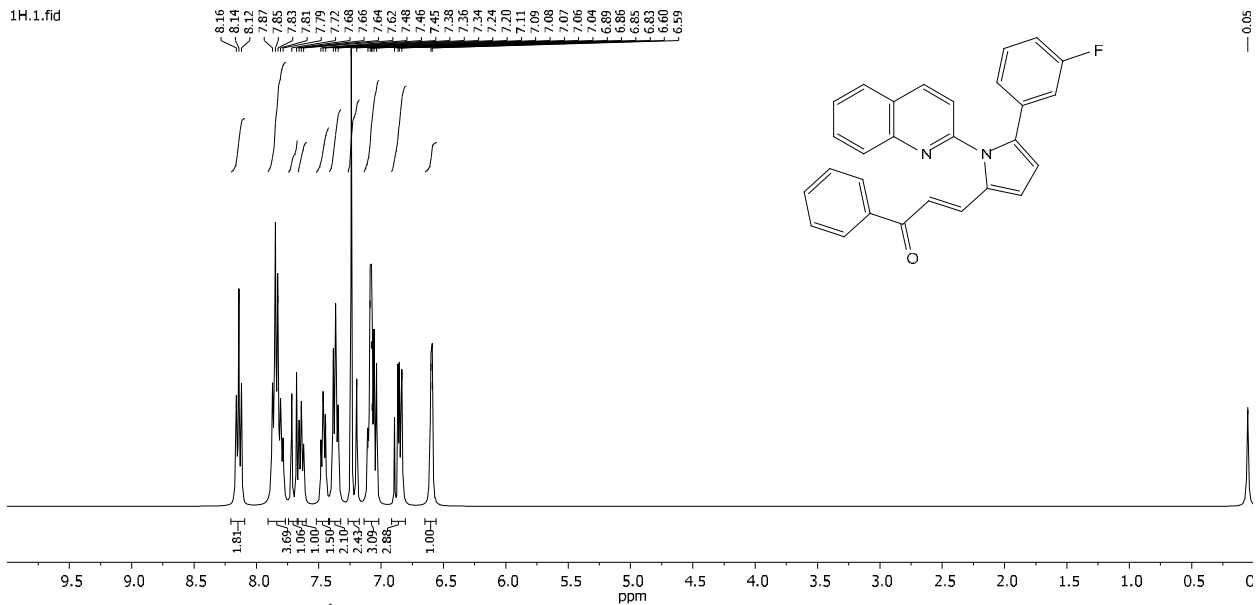

<sup>1</sup>H NMR spectrum of **3k** (400.13 MHz, CDCl<sub>3</sub>)

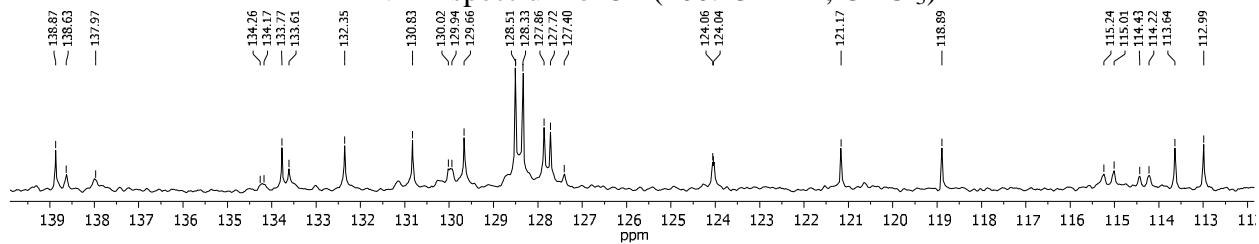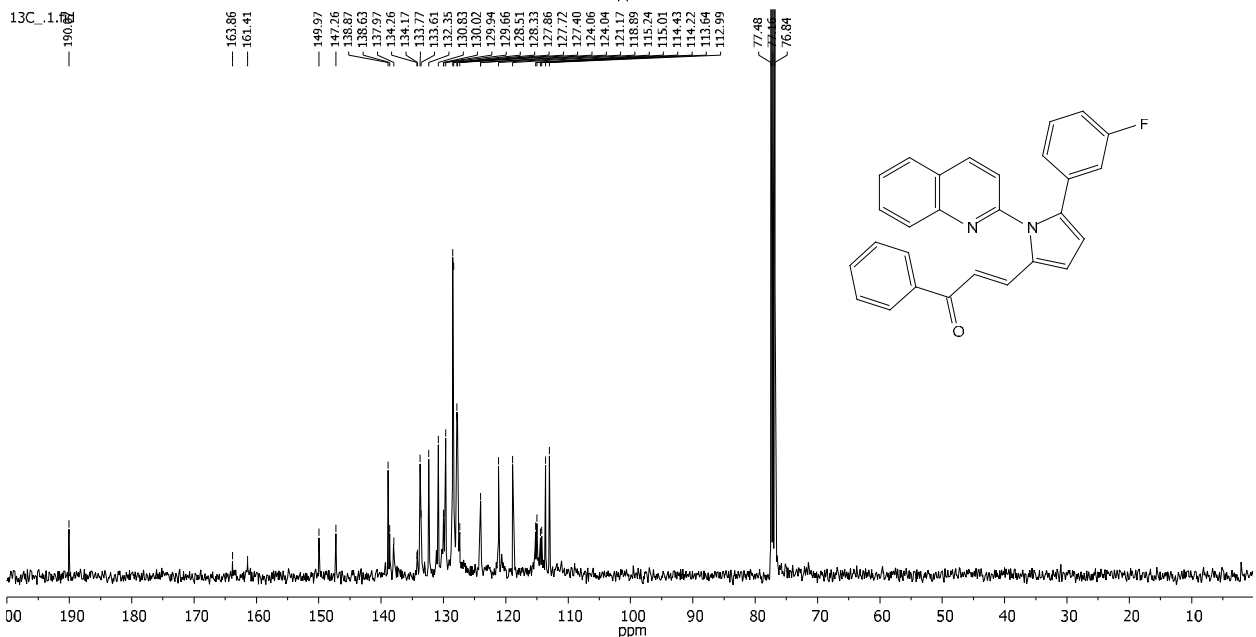

<sup>13</sup>C NMR spectrum of **3k** (100.62 MHz, CDCl<sub>3</sub>)

19F\_1.fid  
F19

-111.89  
-111.89  
-111.86  
-111.89  
-111.91  
-112.23  
-112.25  
-112.26  
-112.27  
-112.28  
-112.30

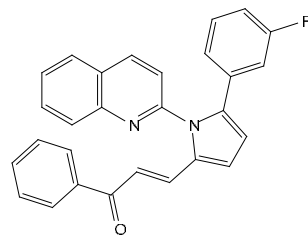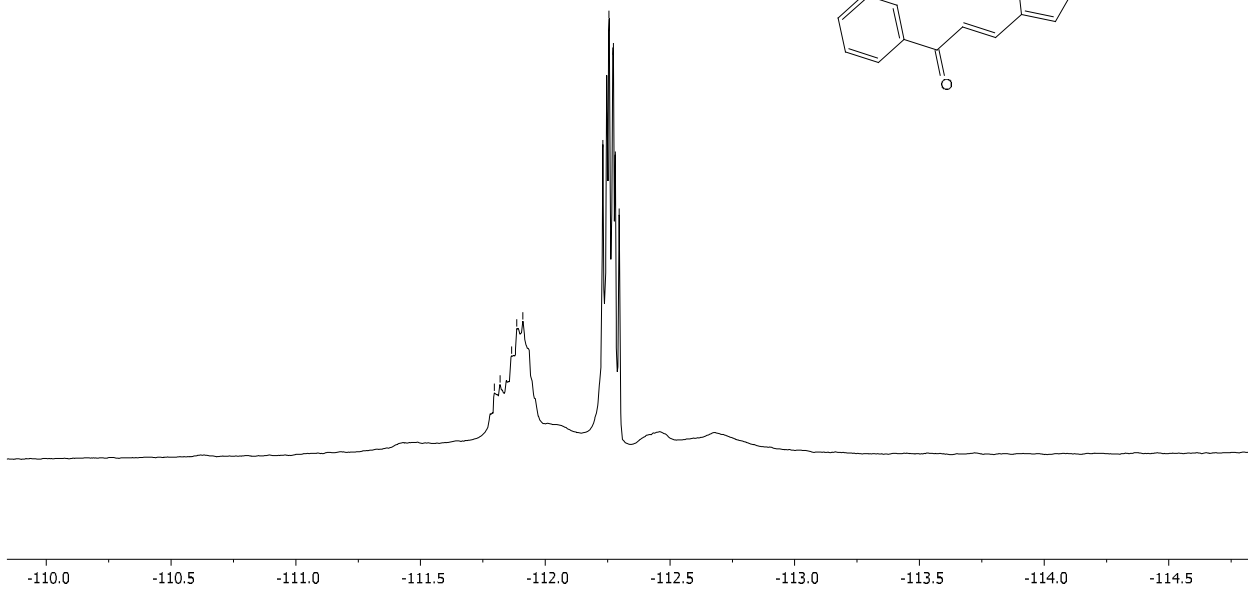

<sup>19</sup>F NMR spectrum of **3k** (376.5 MHz, CDCl<sub>3</sub>)

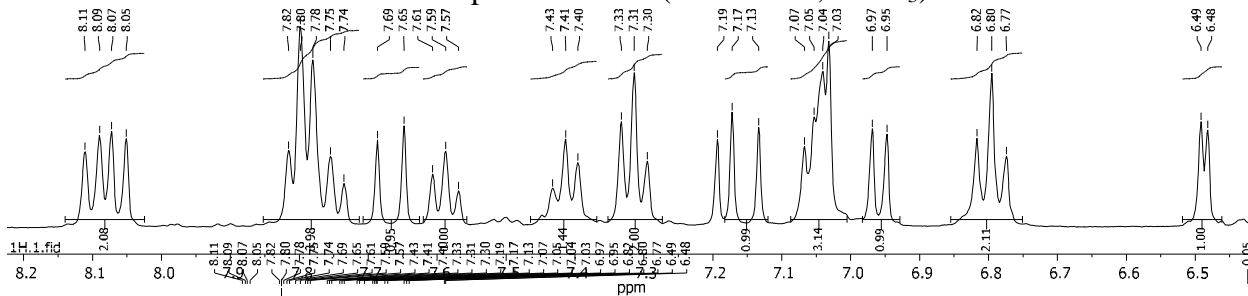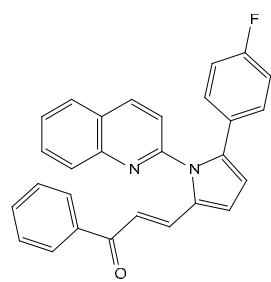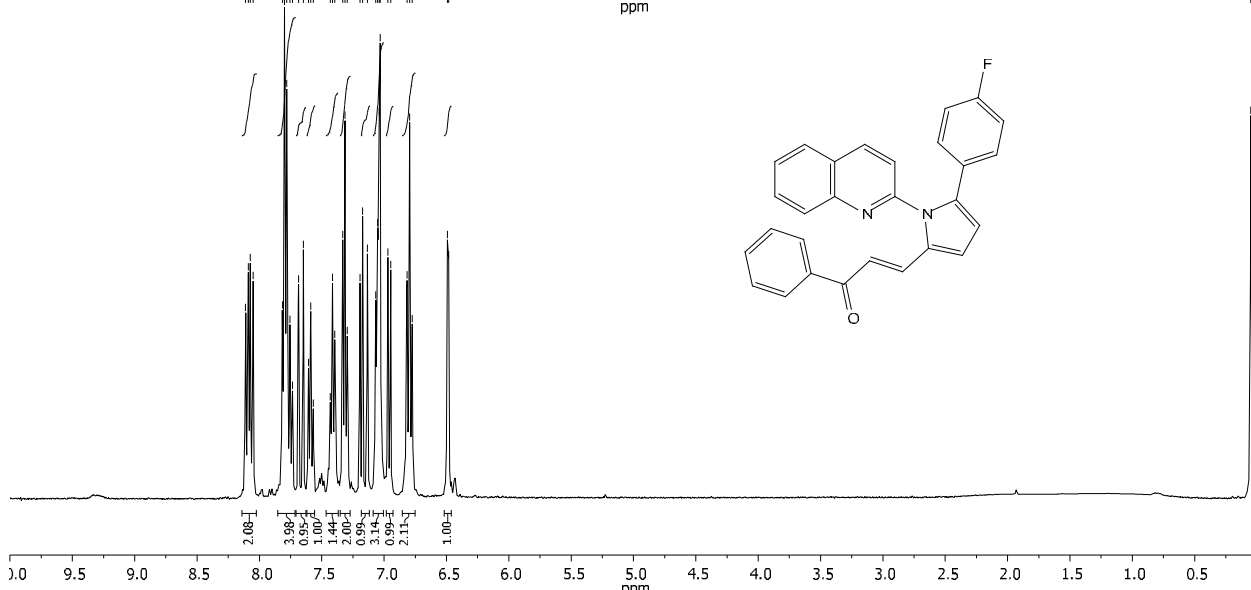

<sup>1</sup>H NMR spectrum of **3l** (400.13 MHz, CDCl<sub>3</sub>)

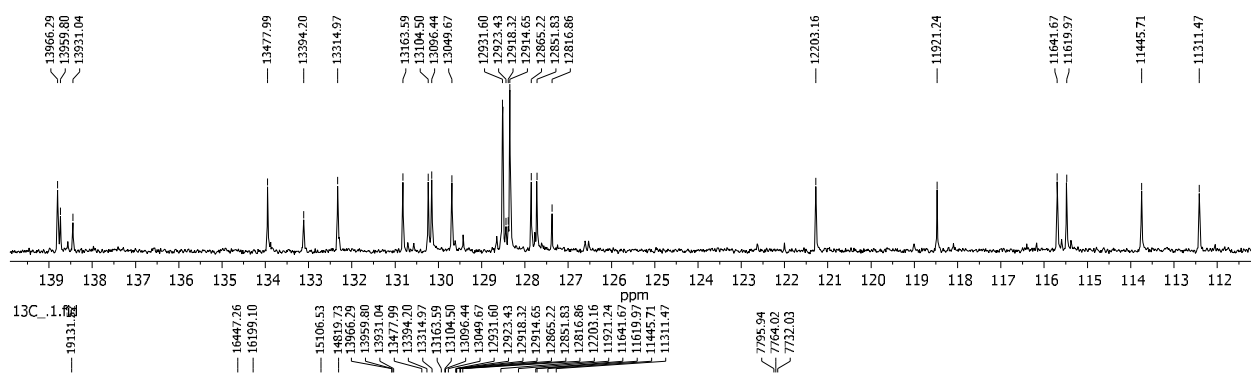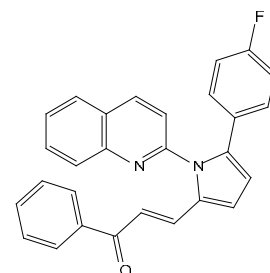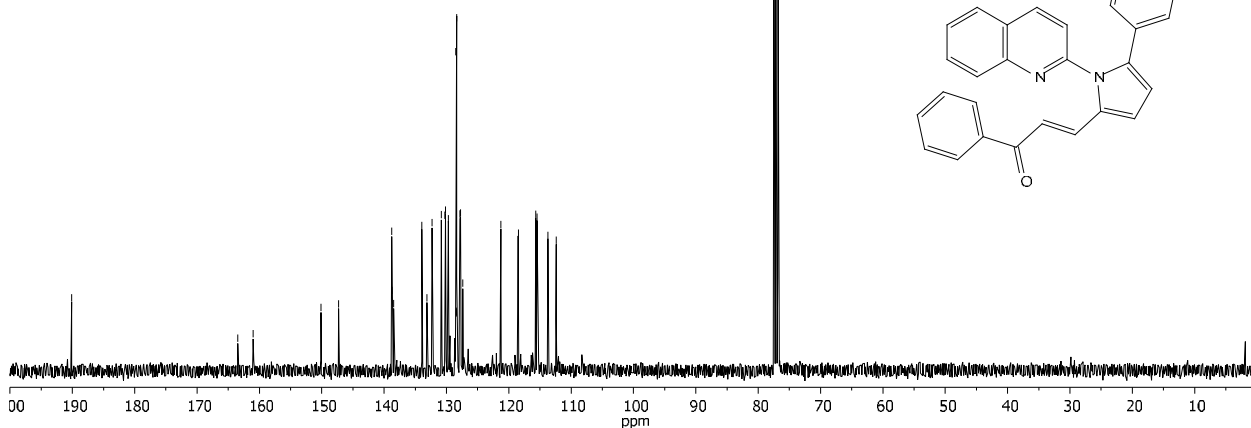

<sup>13</sup>C NMR spectrum of **31** (100.62 MHz, CDCl<sub>3</sub>)

19F\_1.fid  
F19

-113.09, -113.10, -113.11, -113.12, -113.13, -113.64, -113.65, -113.66, -113.69, -113.70, -113.71, -113.77, -113.80, -113.86, -114.00, -114.01, -114.02

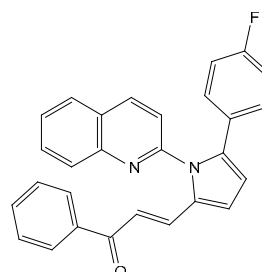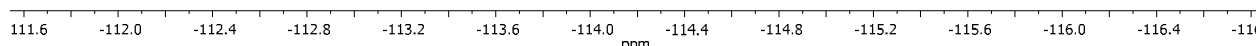

<sup>19</sup>F NMR spectrum of **31** (376.5 MHz, CDCl<sub>3</sub>)

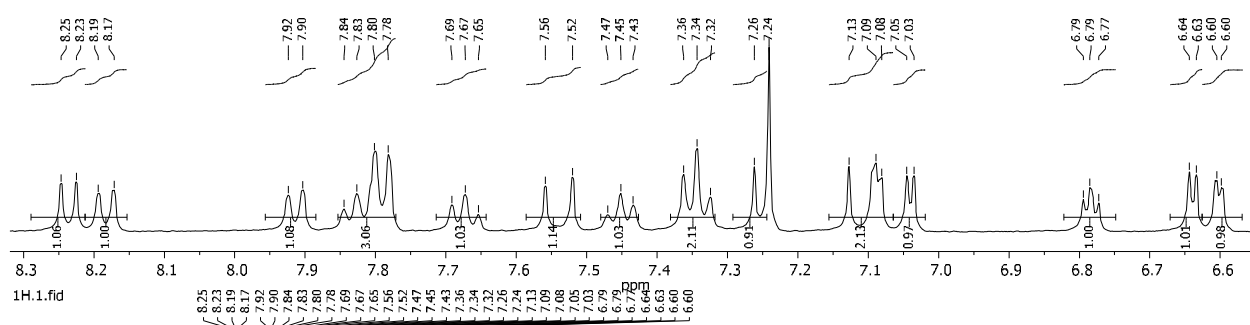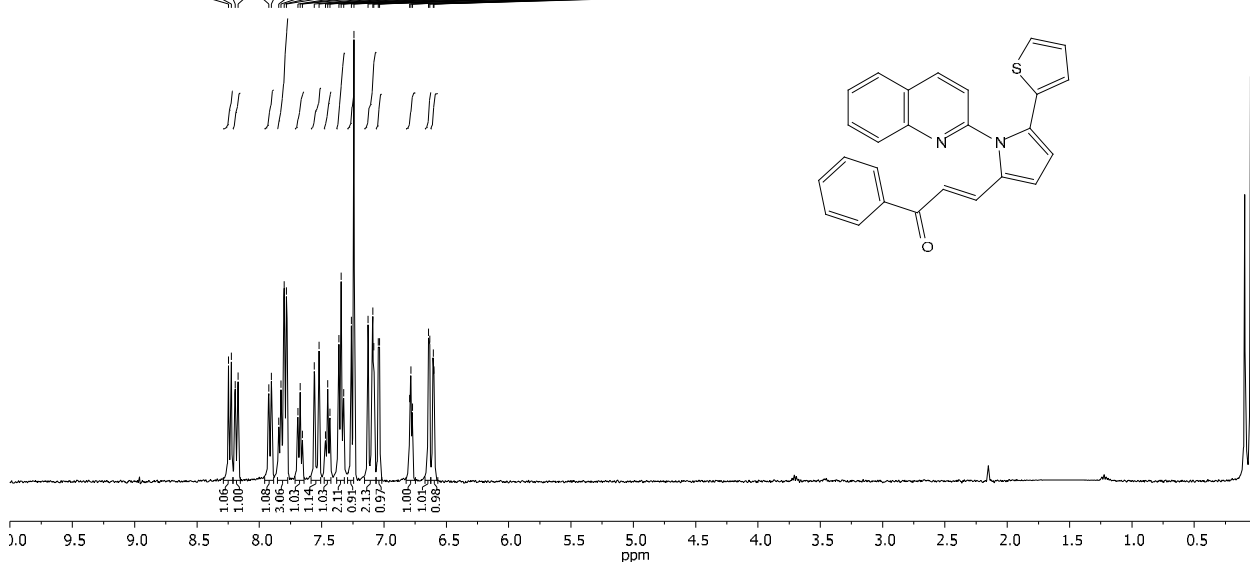

<sup>1</sup>H NMR spectrum of **3m** (400.13 MHz, CDCl<sub>3</sub>)

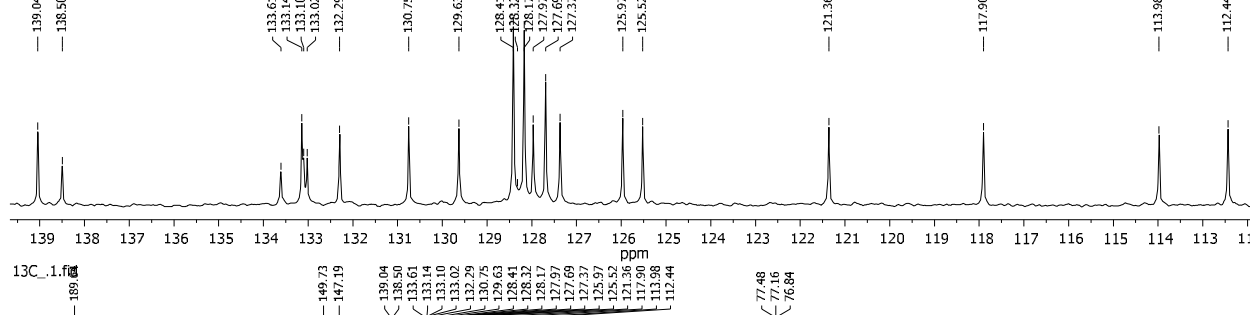

<sup>13</sup>C NMR spectrum of **3m** (100.62 MHz, CDCl<sub>3</sub>)

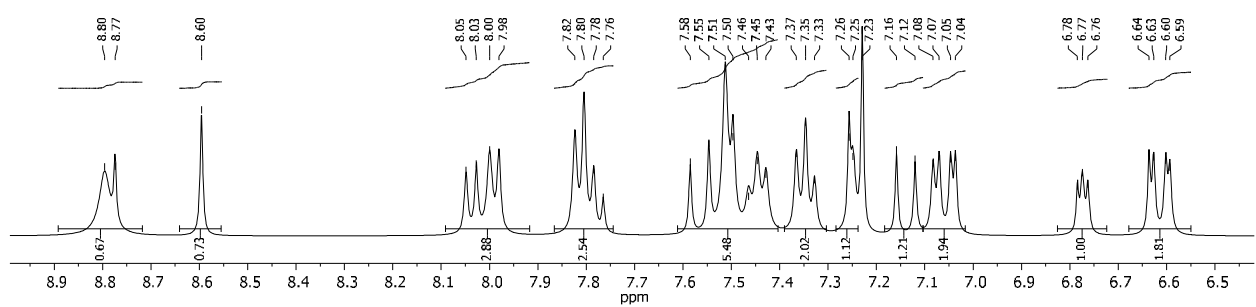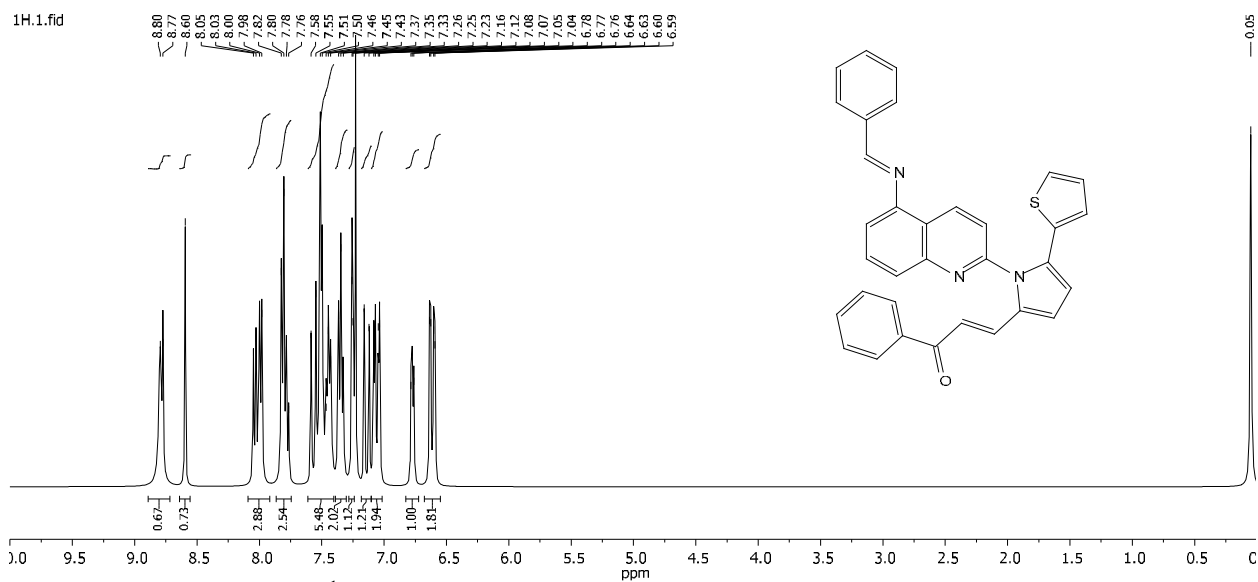

<sup>1</sup>H NMR spectrum of **3n** (400.13 MHz, CDCl<sub>3</sub>)

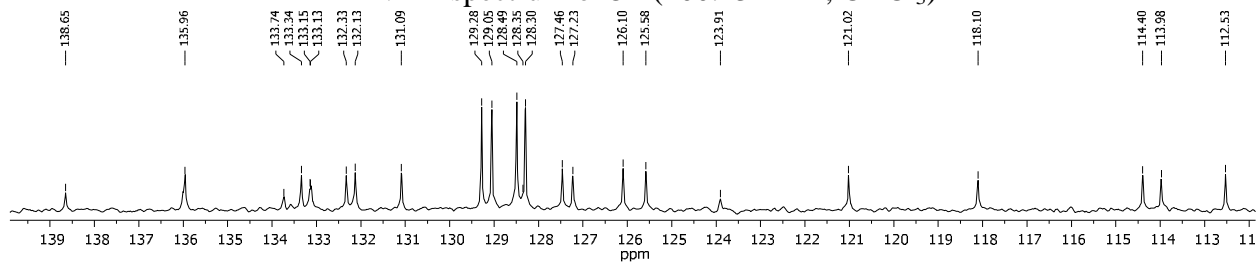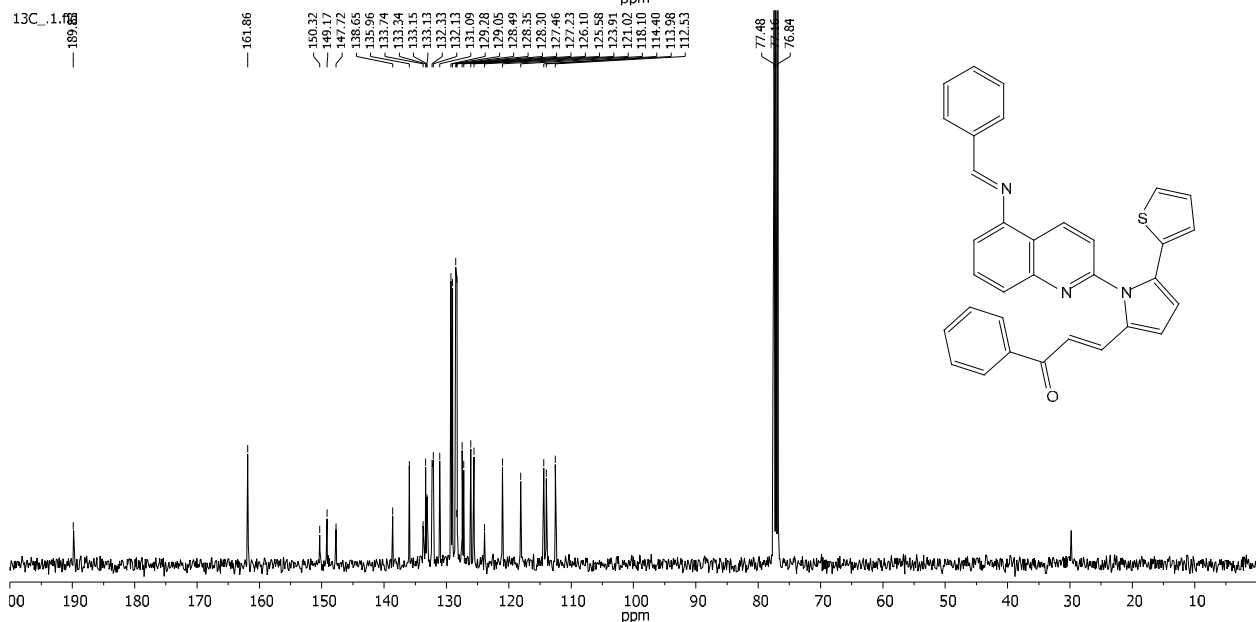

<sup>13</sup>C NMR spectrum of **3n** (100.62 MHz, CDCl<sub>3</sub>)



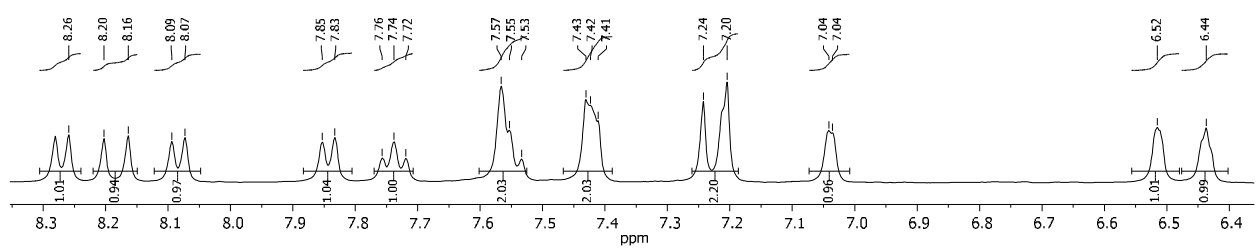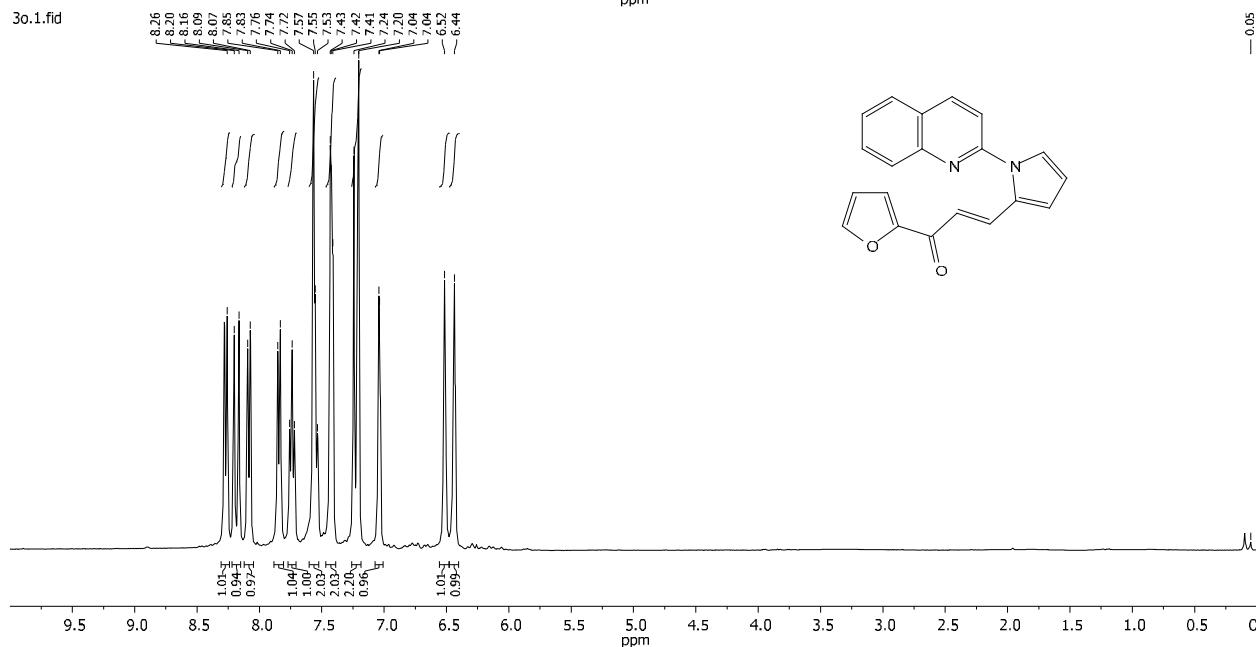

<sup>1</sup>H NMR spectrum of **3o** (400.13 MHz, CDCl<sub>3</sub>)

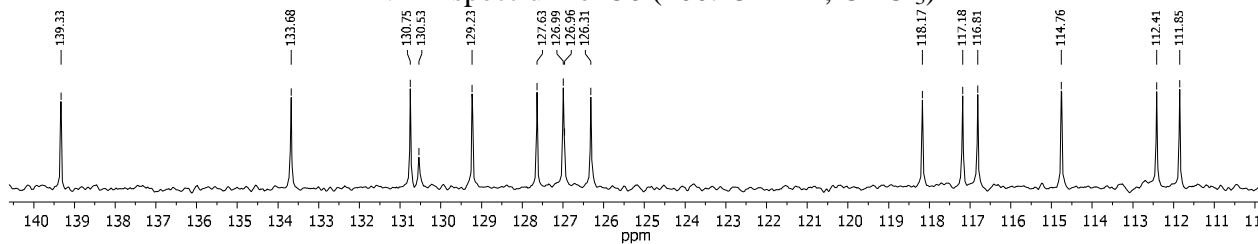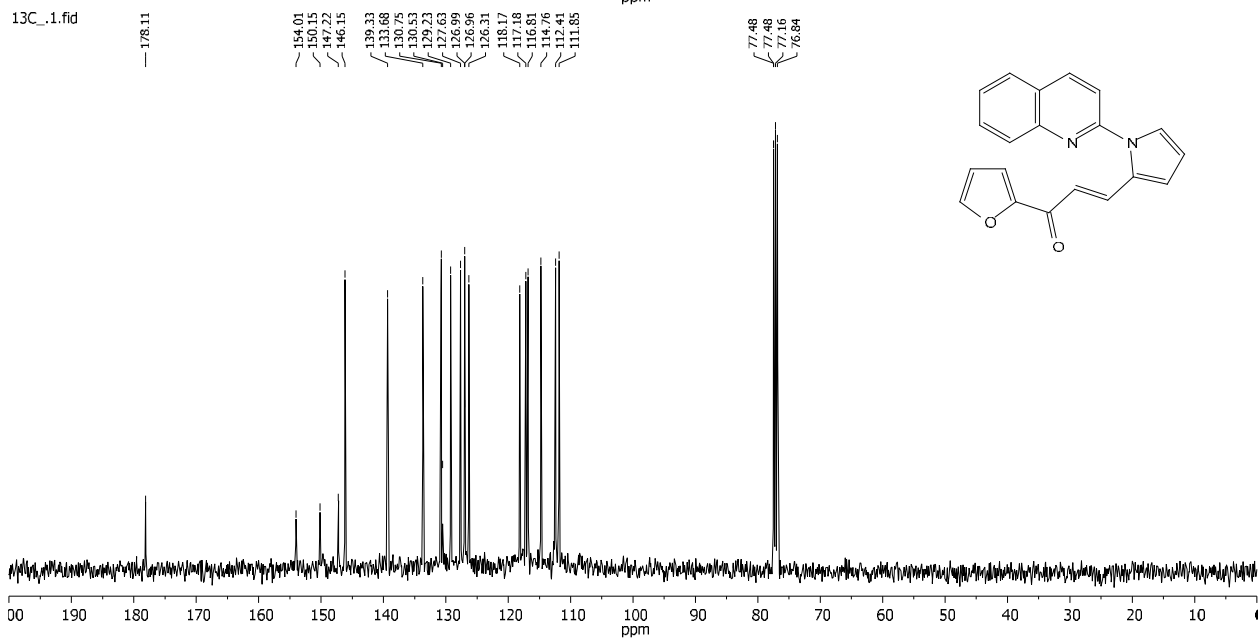

<sup>13</sup>C NMR spectrum of **3o** (100.62 MHz, CDCl<sub>3</sub>)

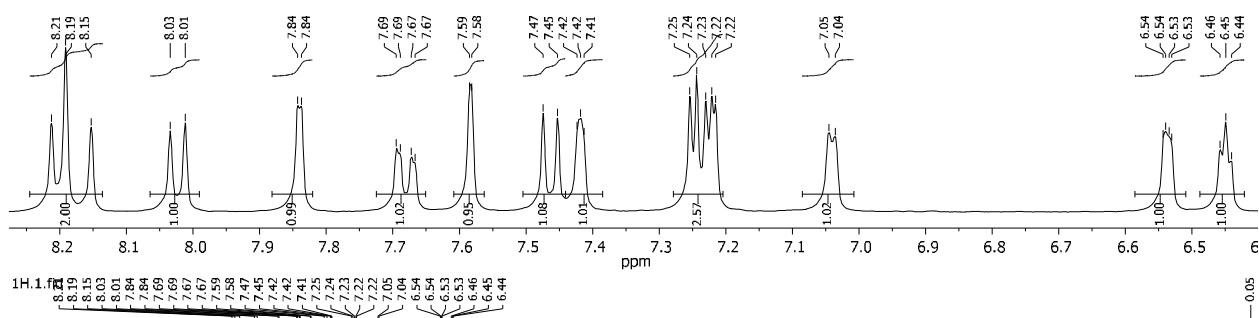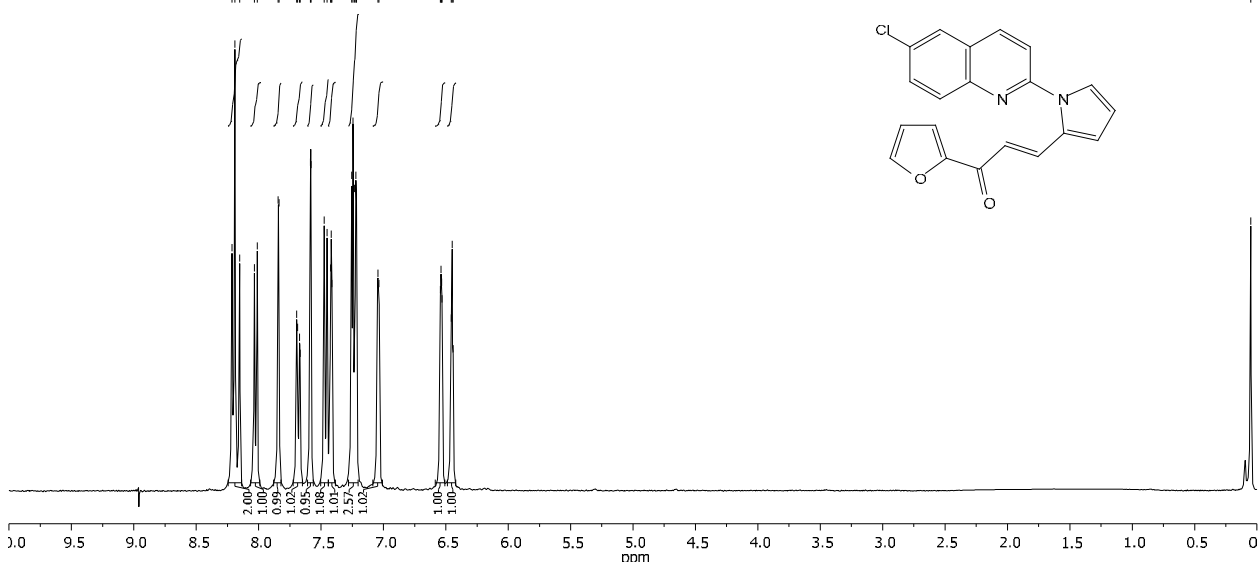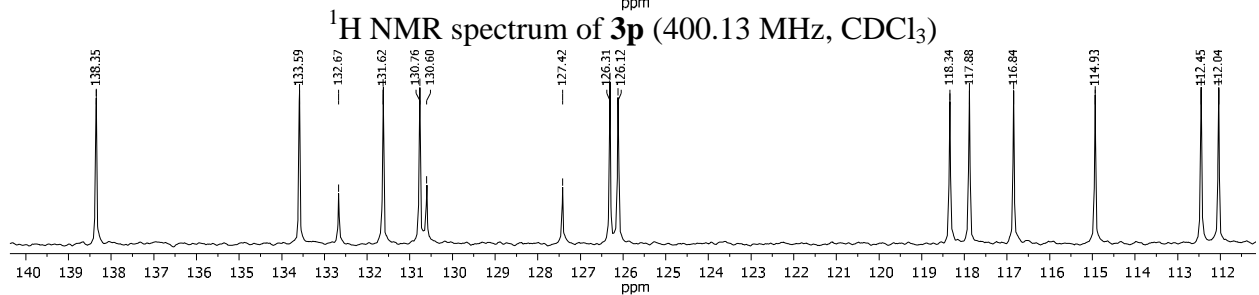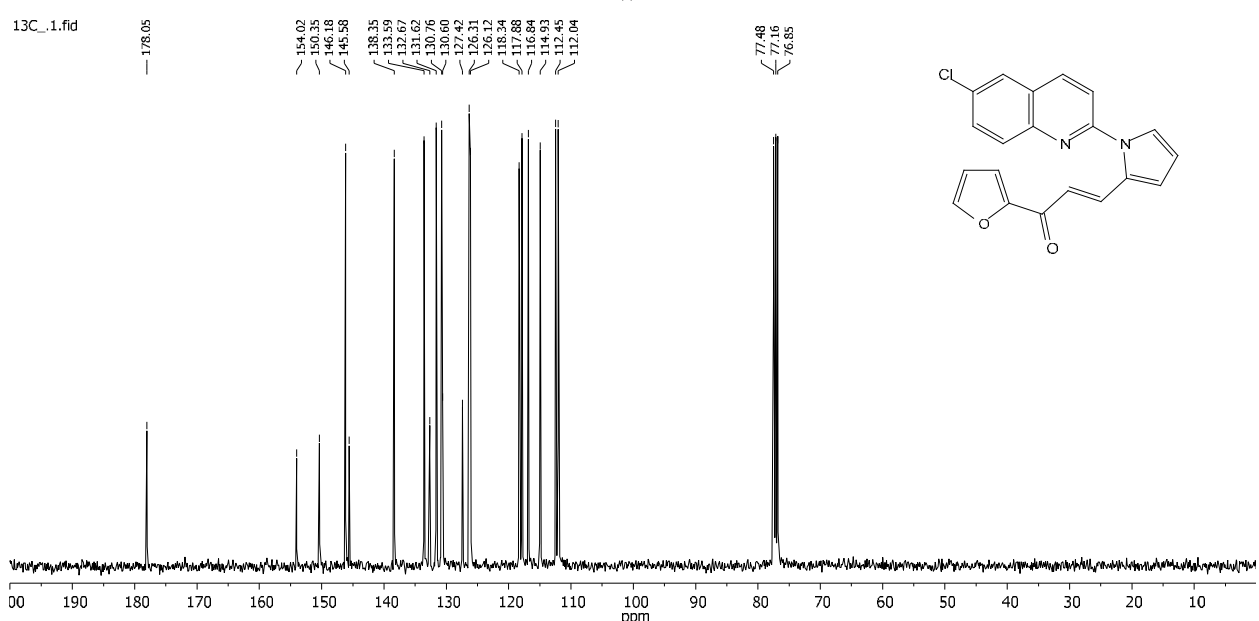

<sup>13</sup>C NMR spectrum of **3p** (100.62 MHz, CDCl<sub>3</sub>)

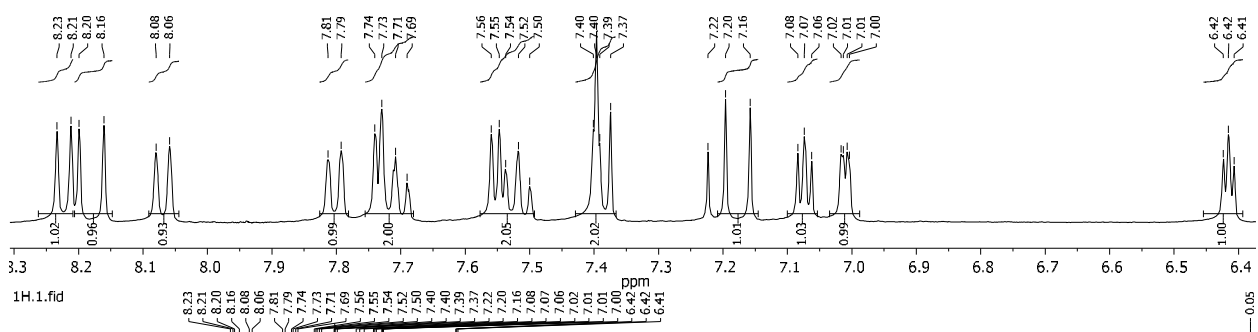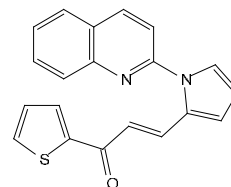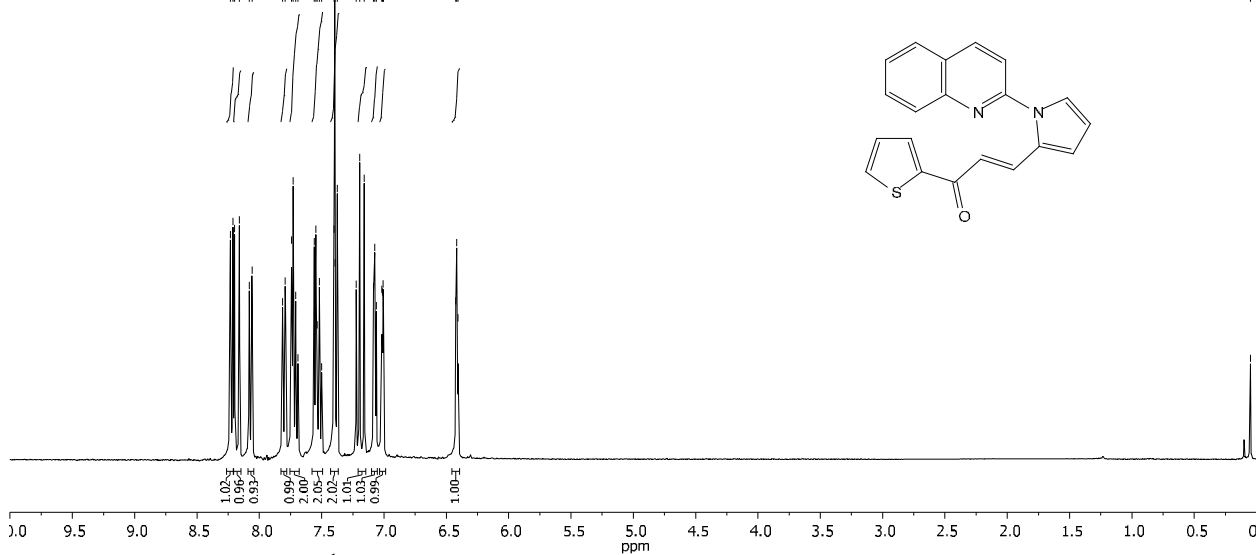

<sup>1</sup>H NMR spectrum of **3q** (400.13 MHz, CDCl<sub>3</sub>)

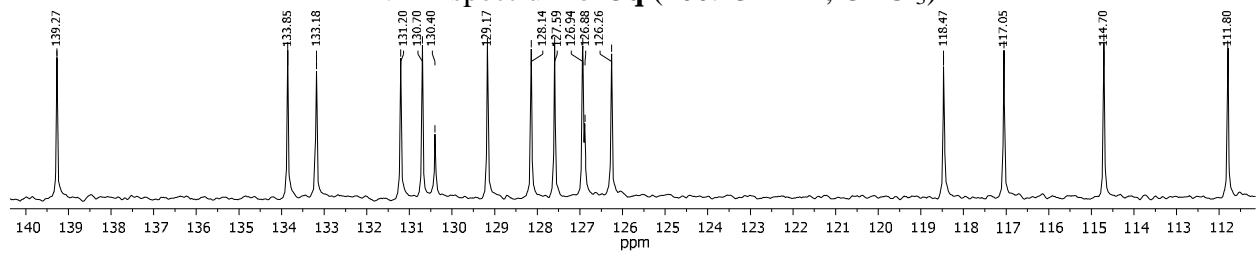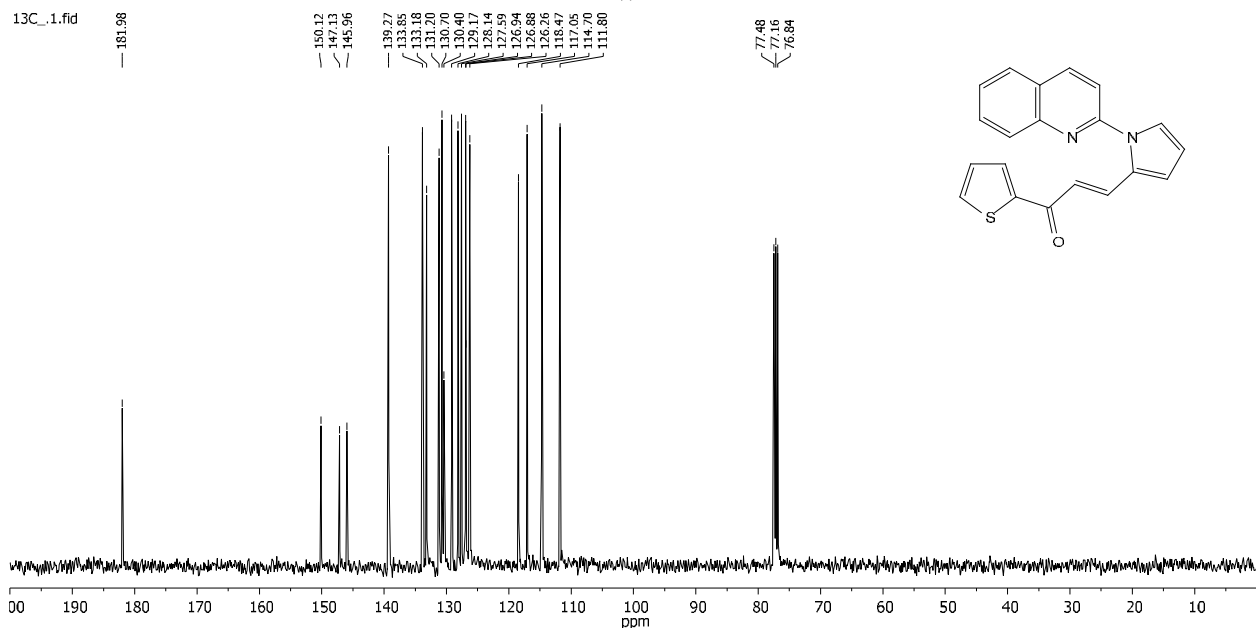

<sup>13</sup>C NMR spectrum of **3q** (100.62 MHz, CDCl<sub>3</sub>)

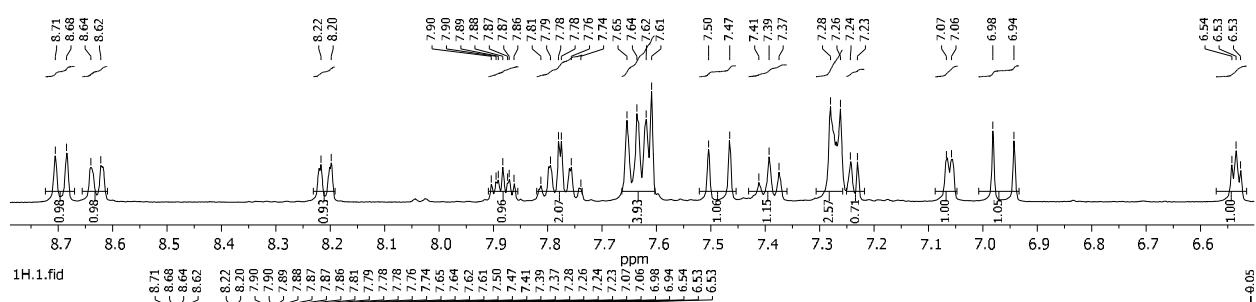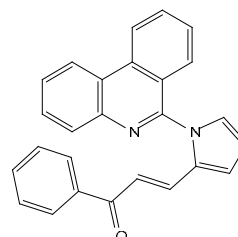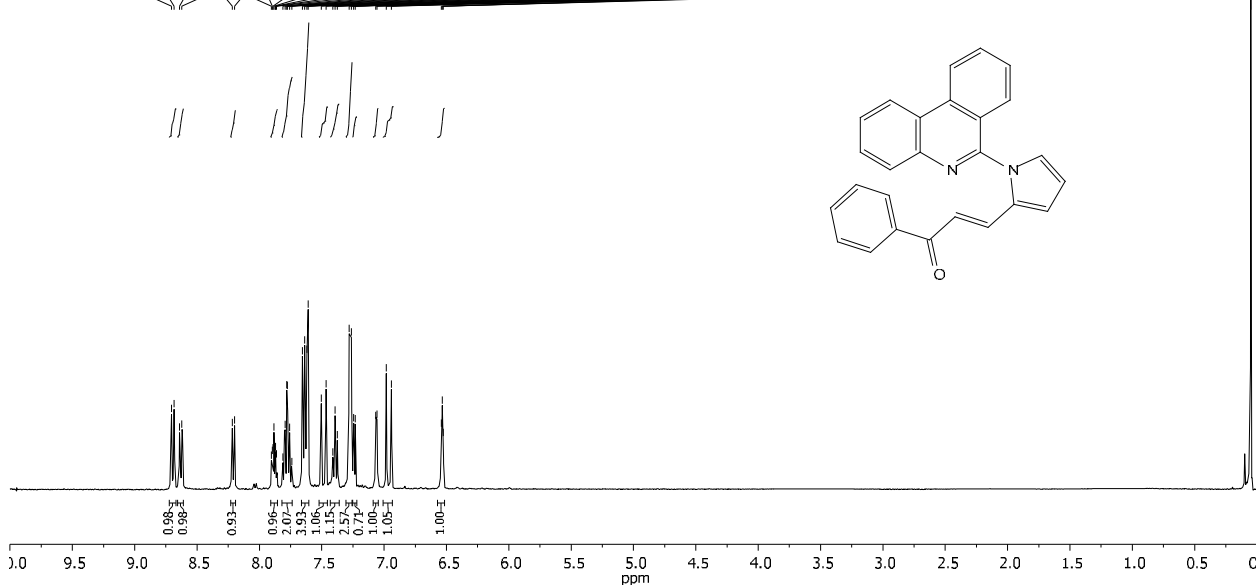

<sup>1</sup>H NMR spectrum of **5a** (400.13 MHz, CDCl<sub>3</sub>)

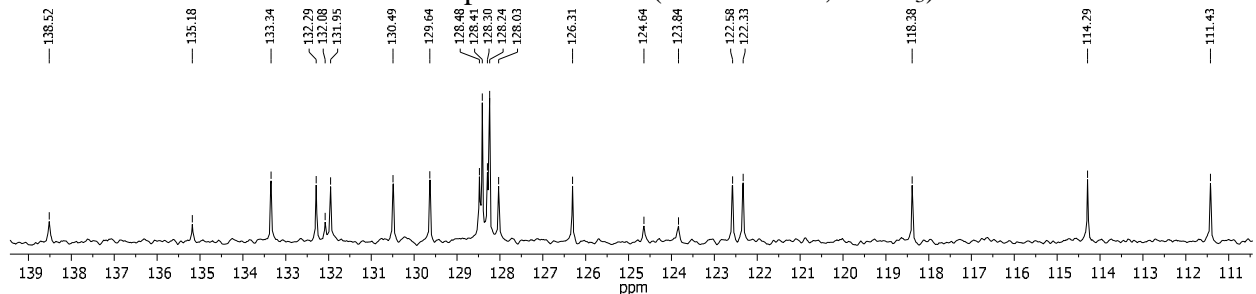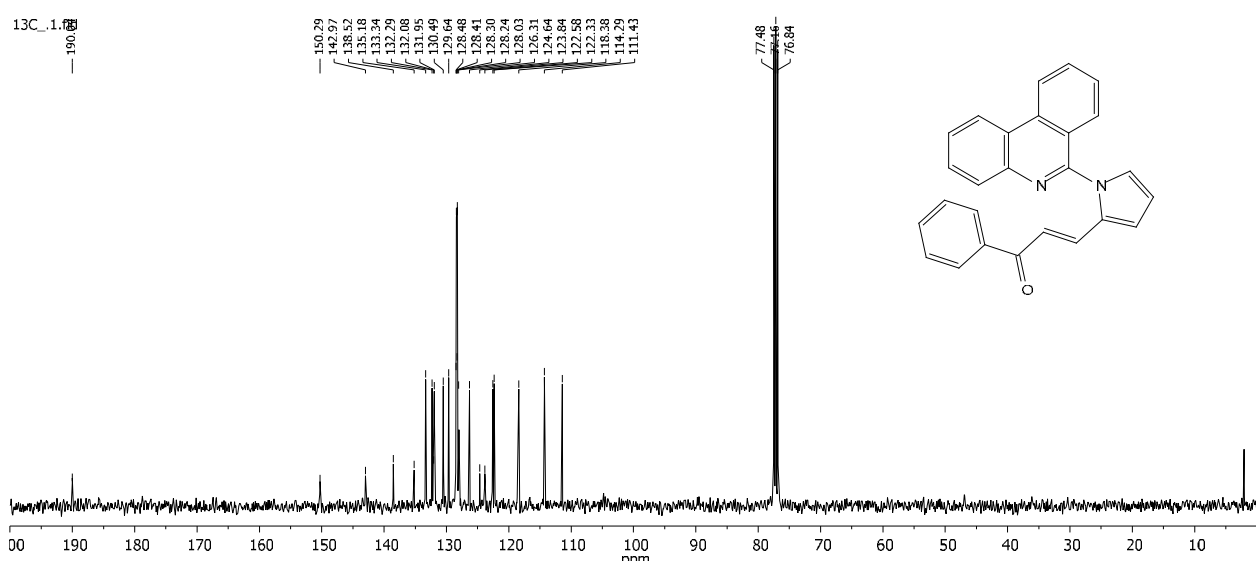

<sup>13</sup>C NMR spectrum of **5a** (100.62 MHz, CDCl<sub>3</sub>)

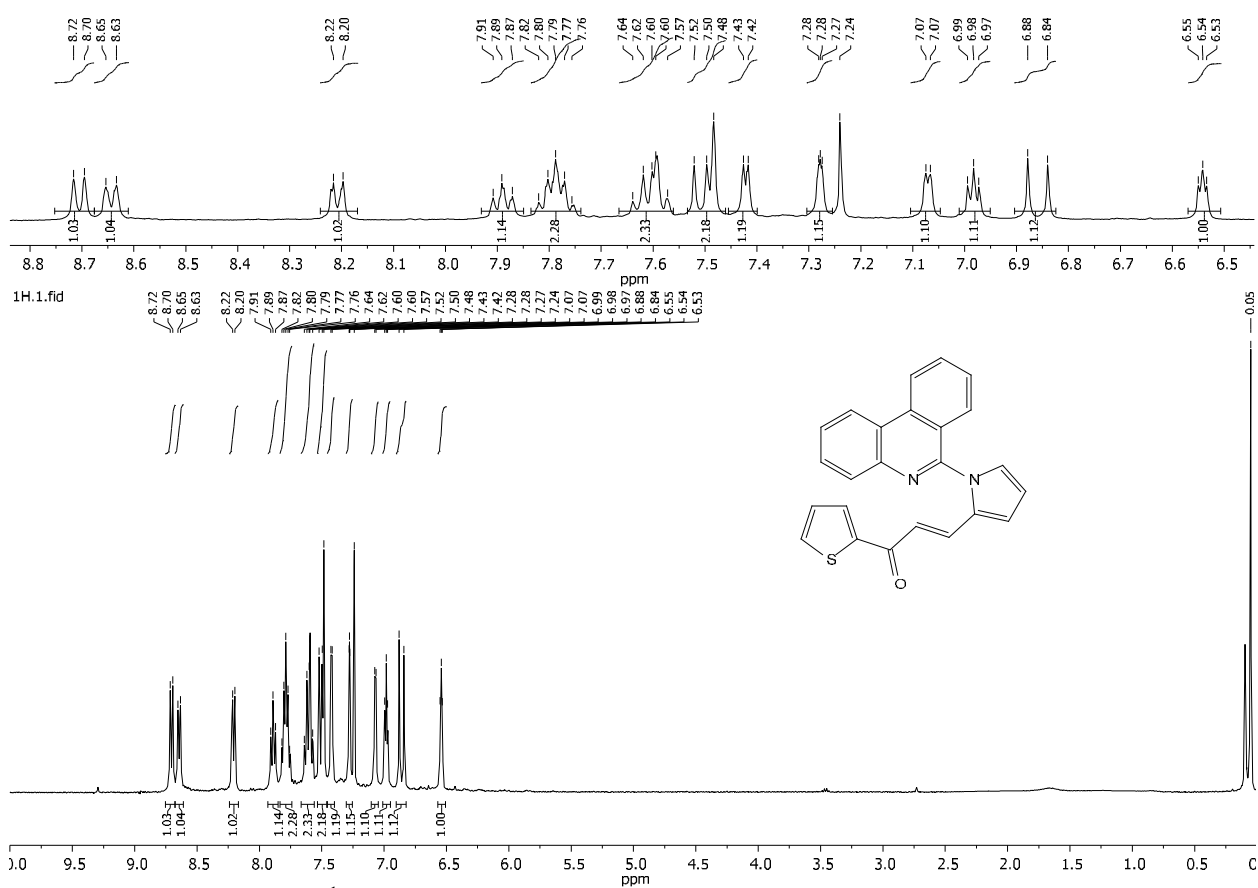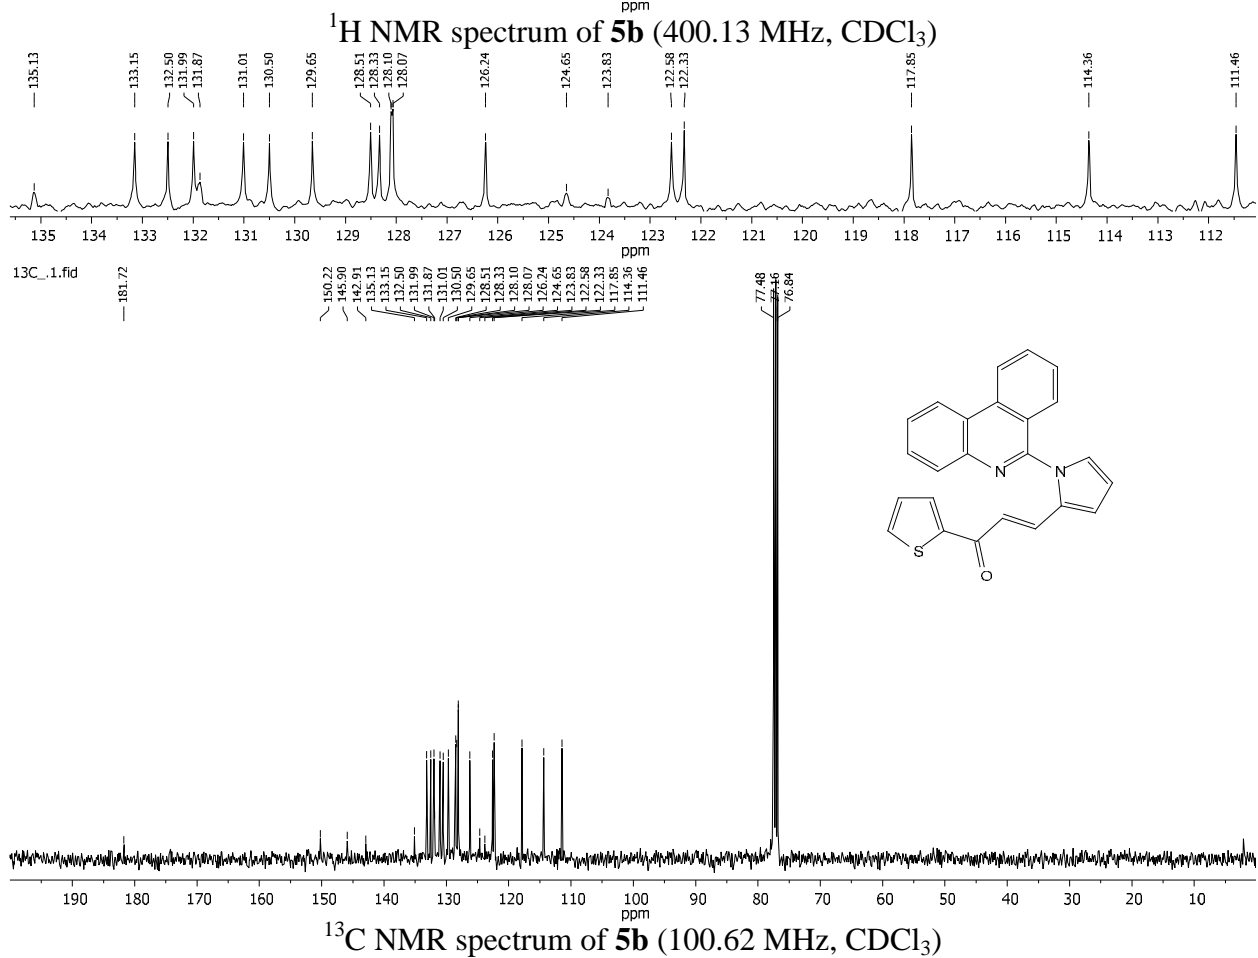

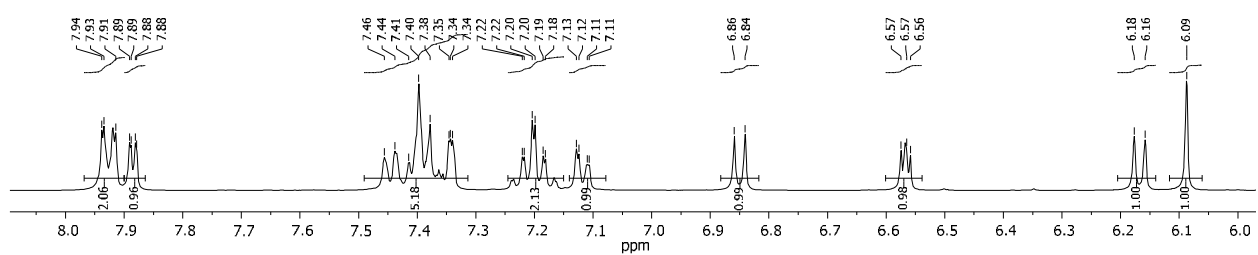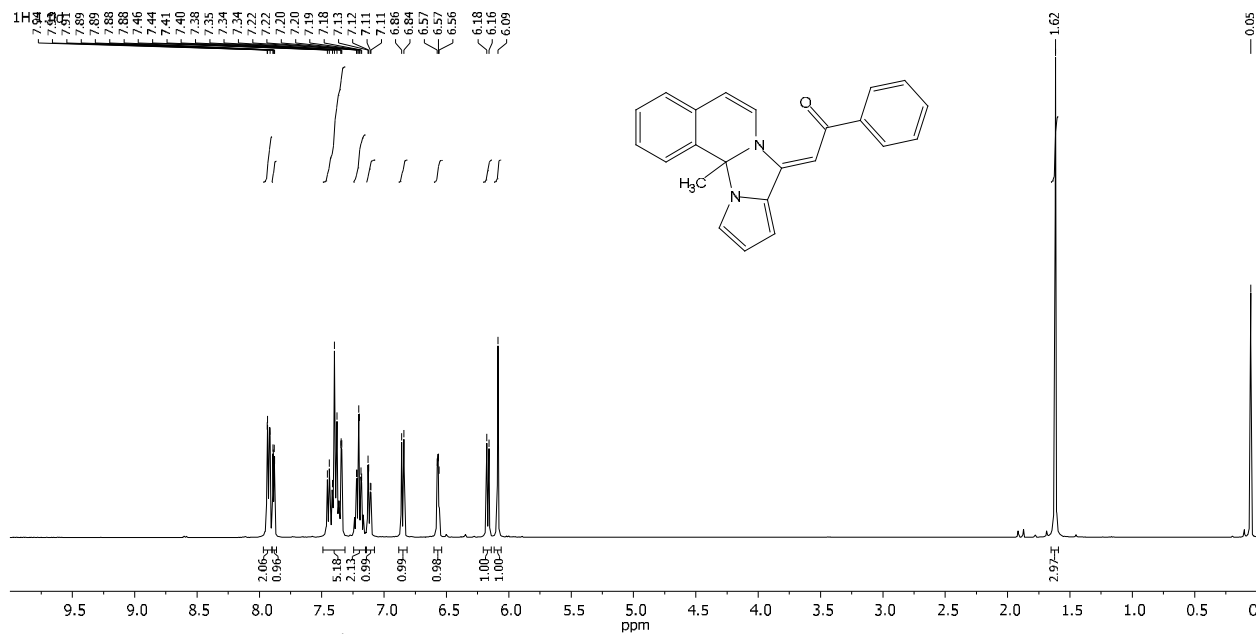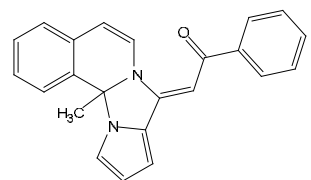

<sup>1</sup>H NMR spectrum of **7** (400.13 MHz, CDCl<sub>3</sub>)

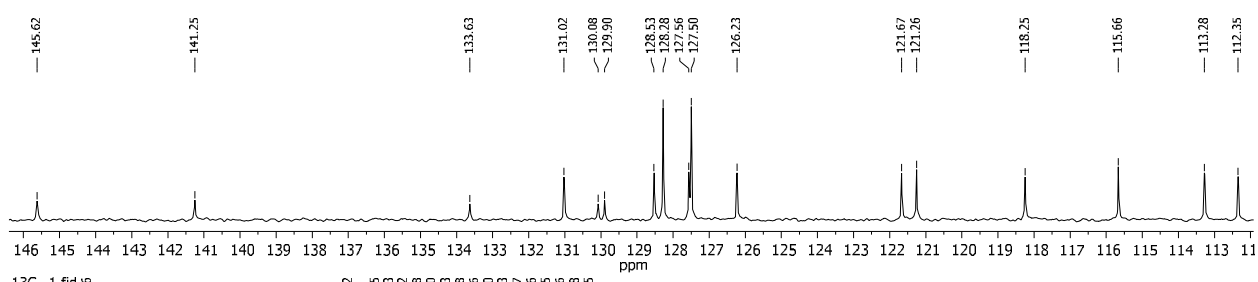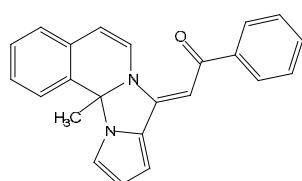

<sup>13</sup>C NMR spectrum of **7** (100.62 MHz, CDCl<sub>3</sub>)

**Cartesian coordinates, the number of imaginary frequencies, and computed total energies of target and optimized structures**

**1a;** E\_CEPA = -401.308470990223; E\_M06-2X = -401.91455909; ZPVE\_corr = 0.13701155; Q\_corr = 0.00659387; H\_corr = 0.00094421; G\_corr = 0.10592643

|   |                   |                   |                   |
|---|-------------------|-------------------|-------------------|
| C | 0.64378889598523  | 1.03334417002936  | -0.28368439342521 |
| C | 1.19442144841190  | -0.21633479782309 | 0.08469117063627  |
| C | 0.35905415392670  | -1.26633578777542 | 0.32957823974808  |
| C | -1.03568039984908 | -1.06691804529514 | 0.20552693590225  |
| N | -1.58664151454423 | 0.07085906446131  | -0.13253054397272 |
| C | -0.76630859854837 | 1.13108419436217  | -0.38120629198907 |
| C | 1.43971808545093  | 2.17244988786518  | -0.55500073663472 |
| C | 0.85449141961562  | 3.35606841387406  | -0.90863561964473 |
| C | -0.55328922724267 | 3.45355073645937  | -1.00667441712340 |
| C | -1.34587786819513 | 2.36942236924393  | -0.74962817898338 |
| H | 2.26965337374412  | -0.31978220673718 | 0.16642035627085  |
| H | 0.73716011010626  | -2.23813732785174 | 0.61349493599751  |
| H | -1.70953647960749 | -1.89526577475268 | 0.39782690296006  |
| H | 2.51645904775821  | 2.08539437833860  | -0.47687476452914 |
| H | 1.46539968745302  | 4.22447334715677  | -1.11530857462409 |
| H | -1.00267533446669 | 4.39677093997328  | -1.28775200205220 |
| H | -2.42413579999832 | 2.42835743847124  | -0.82024401853638 |

**2a;** E\_CEPA = -629.785271805542; E\_M06-2X = -630.70908612; ZPVE\_corr = 0.18547628; Q\_corr = 0.01211979; H\_corr = 0.00094421; G\_corr = 0.14707517

|   |                   |                   |                   |
|---|-------------------|-------------------|-------------------|
| C | -0.05392629245082 | 0.03117960327025  | -0.48264970448946 |
| C | -1.30302880762199 | -0.05082299264435 | 0.13322134668067  |
| C | 1.10201053629449  | 0.08547328407511  | 0.29345853050053  |
| C | -1.39300878030704 | -0.07742845464764 | 1.51466896267287  |
| C | 1.00921396961881  | 0.05710264577408  | 1.67771920481877  |
| C | -0.23639988764714 | -0.02366779159707 | 2.28756280527950  |
| H | -2.19187646996308 | -0.09177096202083 | -0.48124103287746 |
| H | 2.07083728387584  | 0.14901138035566  | -0.18456530419659 |
| H | -2.36136719064688 | -0.13999876328636 | 1.99231527210471  |
| H | 1.90687463415532  | 0.09830709024273  | 2.27941787863003  |
| H | -0.30806354663333 | -0.04501284939238 | 3.36701015321574  |
| C | 0.00502934610676  | 0.05868923906571  | -1.96989494532729 |
| O | -0.99591443736194 | -0.00923553963650 | -2.66131135787461 |
| C | 1.30829361175287  | 0.17253724128566  | -2.57827990465629 |
| C | 2.38891194429161  | 0.26736127356471  | -3.11082169256241 |
| C | 3.64341062698869  | 0.37879119092900  | -3.73280732960045 |
| C | 3.97249462687903  | 0.43001727389802  | -5.07956183946044 |
| H | 3.26489885196275  | 0.38789899515352  | -5.89049020942016 |
| C | 5.37197410730727  | 0.54555549019219  | -5.16313858532450 |
| H | 5.96438674007654  | 0.61046677186852  | -6.05977880277429 |
| C | 5.85981034960450  | 0.56097638369435  | -3.86989480223755 |
| H | 6.86834152469448  | 0.63597844213907  | -3.50059582210882 |
| N | 4.81526666074485  | 0.46062300785328  | -3.01934394426803 |
| H | 4.87740860827835  | 0.44863289986323  | -2.01331389672446 |

**A';** E\_CEPA = -1031.108381523104; E\_M06-2X = -1032.63635298; ZPVE\_corr = 0.32351836; Q\_corr = 0.02041716; H\_corr = 0.00094421; G\_corr = 0.27632199

|   |                   |                    |                   |
|---|-------------------|--------------------|-------------------|
| C | 1.89059825500642  | -4.68229453838123  | -3.05379460305038 |
| C | 0.75278569399533  | -5.24103269695193  | -2.47131931094559 |
| C | 2.50358686459864  | -5.31645532391931  | -4.13277088970941 |
| C | 0.23822577497375  | -6.42933156353847  | -2.96303777658487 |
| C | 1.97514088566409  | -6.49715418692753  | -4.63460927833520 |
| C | 0.84755298078458  | -7.05640657589541  | -4.04684600608347 |
| H | 0.28805347448517  | -4.73987508365055  | -1.63312638140616 |
| H | 3.38684987344834  | -4.88231377168194  | -4.58351340616768 |
| H | -0.63753388673323 | -6.86924885165953  | -2.50532366427891 |
| H | 2.45073999589964  | -6.98464465454736  | -5.47651980282596 |
| H | 0.44217392779275  | -7.98322634527978  | -4.43145523214388 |
| C | 2.41778931332062  | -3.39864603692181  | -2.51217826901073 |
| O | 1.77052653475136  | -2.69768308848604  | -1.75439461631112 |
| C | 3.74835379877884  | -3.02713508855676  | -2.92384955906764 |
| C | 4.88114689617968  | -2.76492975274010  | -3.25453100747021 |
| C | 6.20200267914566  | -2.50308028421584  | -3.65577822742926 |
| C | 6.96459897249261  | -1.34582170224835  | -3.57413610039248 |
| H | 6.63022727269327  | -0.40909497032275  | -3.16054732564587 |
| C | 8.22007977741688  | -1.64012511702914  | -4.13509676122577 |
| H | 9.05636230037515  | -0.96978298046260  | -4.23910881857038 |
| C | 8.18835866332637  | -2.96503889943442  | -4.53604653100786 |
| H | 8.94778955247011  | -3.57277311281060  | -4.99842682890717 |
| N | 6.97143595497303  | -3.47289818720733  | -4.25201722554619 |
| H | 6.65817844796037  | -4.44252466056714  | -4.36990080677855 |
| C | 4.65890279870065  | -8.25315830534582  | -3.94235353378574 |
| C | 4.51470264718422  | -8.20935691621147  | -2.53645011188652 |
| C | 4.99345849784001  | -7.13321525743207  | -1.84760485799277 |
| C | 5.63487790124166  | -6.10041923774484  | -2.56783256394958 |
| N | 5.78987751315201  | -6.10629121105299  | -3.86755310618263 |
| C | 5.30066788154659  | -7.16217949990249  | -4.57671378531884 |
| C | 4.15891632158450  | -9.31628057056688  | -4.73109026046124 |
| C | 4.28353829603047  | -9.28364631077120  | -6.09240212928528 |
| C | 4.91691048391647  | -8.18852713469303  | -6.72462988168874 |
| C | 5.41833377774675  | -7.15164214843385  | -5.98630060973134 |
| H | 4.01870970689128  | -9.02818155791143  | -2.02937425730314 |
| H | 4.89844261304820  | -7.05638515654811  | -0.77402171486982 |
| H | 6.03153235461134  | -5.24157018216983  | -2.03493841601168 |
| H | 3.66872201833923  | -10.14543769548470 | -4.23586499714899 |
| H | 3.89445869721932  | -10.09380540158636 | -6.69421890375684 |
| H | 5.00296242161172  | -8.17479356182092  | -7.80300097216248 |
| H | 5.90529512753541  | -6.30598453788720  | -6.45474526356903 |

**TS<sub>A</sub>-A**; E\_CEPA = -1031.065811788683; E\_M06-2X = -1032.59545579; ZPVE\_corr = 0.32296133; Q\_corr = 0.01956280; H\_corr = 0.00094421; G\_corr = 0.27692922; -354.71 cm<sup>-1</sup> \*\*\*imaginary mode\*\*\*

|   |                  |                   |                   |
|---|------------------|-------------------|-------------------|
| C | 1.86857102292916 | -5.09682422557767 | -3.66833862702672 |
| C | 1.14817369941077 | -6.23644369462444 | -3.31822888737300 |
| C | 1.77667841433783 | -4.59326298271423 | -4.96434166786653 |
| C | 0.36013815675880 | -6.87959226877352 | -4.26174949793917 |
| C | 0.97324782560626 | -5.22526449667511 | -5.90208963396553 |
| C | 0.27161079908994 | -6.37444610802739 | -5.55449415476190 |
| H | 1.22937158979625 | -6.62098541608523 | -2.31008351185260 |



|   |                   |                    |                   |
|---|-------------------|--------------------|-------------------|
| H | 2.33750515596637  | -3.70730359356336  | -5.23398356601588 |
| H | -0.18282596132858 | -7.77576365609527  | -3.99174927265174 |
| H | 0.89853140222617  | -4.82689449896244  | -6.90524935795745 |
| H | -0.34493575627726 | -6.87489137682578  | -6.28965498180812 |
| C | 2.77883126870072  | -4.48333591195131  | -2.64848585175151 |
| O | 2.55380359928084  | -4.62455061891103  | -1.44439628193484 |
| C | 3.89856314166507  | -3.77242708510939  | -3.14906561282072 |
| C | 5.11307308422805  | -3.92741454489180  | -3.42838471818525 |
| C | 6.31836629851235  | -3.24766787602634  | -3.82621636270908 |
| C | 6.63815922625614  | -1.91048062238877  | -3.69366191943869 |
| H | 6.02064224104003  | -1.17162309525966  | -3.21081934449074 |
| C | 7.89955724784360  | -1.71750121782257  | -4.30702732151189 |
| H | 8.44914680844404  | -0.79404734225926  | -4.37944169313427 |
| C | 8.31090663857490  | -2.93988235750234  | -4.78667055600018 |
| H | 9.20946269517603  | -3.23138020024486  | -5.30250412368288 |
| N | 7.34795993999477  | -3.85378585384709  | -4.49099860905743 |
| H | 7.38199766534800  | -4.83415063096224  | -4.72085172848623 |
| C | 5.05750707766728  | -8.02430608848901  | -3.11849794648980 |
| C | 5.71115134430766  | -8.18501352223017  | -1.87506886210823 |
| C | 6.34921696972676  | -7.12331738775530  | -1.29942525497032 |
| C | 6.31214046925634  | -5.87929254744749  | -1.95556900832891 |
| N | 5.70778709797197  | -5.70560557798248  | -3.10521283870794 |
| C | 5.08456077608889  | -6.74800697972760  | -3.72930982062773 |
| C | 4.39251488372087  | -9.08643978233935  | -3.77622823116637 |
| C | 3.79528856667898  | -8.87913664764432  | -4.98805245542316 |
| C | 3.84444205734809  | -7.60601330693480  | -5.59979064324922 |
| C | 4.47455566163269  | -6.55769402764453  | -4.98827875697090 |
| H | 5.69750270062922  | -9.15568587226850  | -1.39523171585062 |
| H | 6.86295112407713  | -7.20954731253696  | -0.35353037458084 |
| H | 6.77647172121335  | -5.00181830225516  | -1.51889664105661 |
| H | 4.37293103301308  | -10.05934530551593 | -3.30186767676167 |
| H | 3.28563018026432  | -9.69094815629478  | -5.48903220550417 |
| H | 3.37242966813170  | -7.45916004248451  | -6.56207478350199 |
| H | 4.50986824069101  | -5.57832716334750  | -5.44541654627884 |

A; E\_CEPA = -1031.084765757220; E\_M06-2X = -1032.61324088; ZPVE\_corr = 0.32543172; Q\_corr = 0.01943017; H\_corr = 0.00094421; G\_corr = 0.27966242

|   |                  |                   |                   |
|---|------------------|-------------------|-------------------|
| C | 2.14890597967868 | -5.24594939169563 | -3.56053360713985 |
| C | 1.56949130654930 | -6.45490412565719 | -3.17764522654047 |
| C | 1.97466698529796 | -4.78945436508265 | -4.86680805789916 |
| C | 0.84531571202273 | -7.20749760484340 | -4.09193685996355 |
| C | 1.23493197771026 | -5.53293932029153 | -5.77628009698183 |
| C | 0.67606772492906 | -6.74715102775891 | -5.39336601749350 |
| H | 1.70827952853700 | -6.80432945456062 | -2.16289242303367 |
| H | 2.41765963411307 | -3.84823036291739 | -5.16480513887028 |
| H | 0.41302529814250 | -8.15280777614979 | -3.79104946707997 |
| H | 1.09580807954996 | -5.16693853856857 | -6.78505942203741 |
| H | 0.10730283185218 | -7.33087402310296 | -6.10517780901957 |
| C | 3.01604014763255 | -4.52282895417824 | -2.56668979363940 |
| O | 2.76013536772991 | -4.60943244189342 | -1.35354927281043 |
| C | 4.08082123123825 | -3.76815021478576 | -3.10926006069154 |
| C | 5.31768083109393 | -4.18265389946089 | -3.28596471811074 |

|   |                  |                    |                   |
|---|------------------|--------------------|-------------------|
| C | 6.45843314942325 | -3.47749452355252  | -3.85668944574705 |
| C | 7.76760808856237 | -3.86775512365865  | -4.06053385458810 |
| H | 8.18573899550815 | -4.82744282158883  | -3.80220889788689 |
| C | 8.44220140006476 | -2.77480988148108  | -4.66778279624014 |
| H | 9.47729189158884 | -2.73640047599186  | -4.96351009941317 |
| C | 7.52569699094090 | -1.76157693988551  | -4.81263485043984 |
| H | 7.62511685321297 | -0.77132464532903  | -5.22277015956430 |
| N | 6.33254033686096 | -2.20119950098787  | -4.31949482658137 |
| H | 5.47044768588845 | -1.67965751844303  | -4.28777353518604 |
| C | 5.70255515207470 | -7.93843945445888  | -3.23502202553719 |
| C | 6.20263164299619 | -8.10307158271709  | -1.92628144381697 |
| C | 6.44007097868282 | -7.01064800387870  | -1.13814810104280 |
| C | 6.16737134666320 | -5.74066245032860  | -1.65003538319189 |
| N | 5.69440683335908 | -5.56766569455334  | -2.87304038018251 |
| C | 5.45523236671318 | -6.63180604931548  | -3.71386259700794 |
| C | 5.43491423500283 | -9.03940356117311  | -4.08295934223641 |
| C | 4.94856313240339 | -8.83527073151452  | -5.34233942137255 |
| C | 4.71715509381267 | -7.52259805565612  | -5.80929922290448 |
| C | 4.96395677009581 | -6.43289773919183  | -5.01873891849648 |
| H | 6.39181082885224 | -9.10422231794226  | -1.56016060608400 |
| H | 6.82246157758976 | -7.09843862239163  | -0.13294942389178 |
| H | 6.32128122515355 | -4.83953374829741  | -1.07313623596912 |
| H | 5.62307649199600 | -10.03649182242763 | -3.70703466782405 |
| H | 4.74004250033702 | -9.67569674332942  | -5.98962140179033 |
| H | 4.33594009682665 | -7.37400384928364  | -6.81061850505902 |
| H | 4.77760963131275 | -5.43093588267473  | -5.37568184763405 |

A-H<sub>2</sub>O; E\_CEPA = -1107.471633065241; E\_M06-2X = -1109.06363958; ZPVE\_corr = 0.34933435; Q\_corr = 0.02250826; H\_corr = 0.00094421; G\_corr = 0.29984013

|   |                   |                   |                   |
|---|-------------------|-------------------|-------------------|
| C | 1.79143200673535  | -5.57784299656403 | -4.42498956529962 |
| C | 0.84389080333335  | -6.59450308716986 | -4.31991453207632 |
| C | 1.59234572145690  | -4.38492269195537 | -3.73027361588742 |
| C | -0.28410838118675 | -6.42423762058999 | -3.53059083905383 |
| C | 0.46282313760266  | -4.21241432340454 | -2.94197913575094 |
| C | -0.47630741150085 | -5.23216182301197 | -2.84018753562590 |
| H | 1.00730573235540  | -7.51657925288034 | -4.86103734097882 |
| H | 2.32146444226521  | -3.58886829479297 | -3.81495108460205 |
| H | -1.01368008901917 | -7.21929572898709 | -3.45123883767443 |
| H | 0.31381999105497  | -3.28270023598451 | -2.40916535187255 |
| H | -1.35672901647506 | -5.09788088233447 | -2.22553728832144 |
| C | 3.02573990186457  | -5.81421707620348 | -5.25582923264188 |
| O | 3.10539404007519  | -6.84010893148924 | -5.94236071720551 |
| C | 6.22358366971101  | -7.91820017425388 | -2.80663501770157 |
| C | 5.61386798473185  | -7.74164004126676 | -1.54775904200981 |
| C | 4.89103596132357  | -6.60977831925730 | -1.28534079795405 |
| C | 4.77135248795305  | -5.64347424556354 | -2.28427469988978 |
| N | 5.32696272425382  | -5.79828697039135 | -3.47551683703830 |
| C | 6.06963402903198  | -6.91385598988954 | -3.78947975969350 |
| C | 6.98421699349895  | -9.07015068519465 | -3.11972976268756 |
| C | 7.56050098357307  | -9.19944623744283 | -4.35005406156184 |
| C | 7.39793096376364  | -8.18570911807958 | -5.31984734661572 |
| C | 6.66617106274344  | -7.05980211449572 | -5.05697819199295 |

|   |                  |                    |                   |
|---|------------------|--------------------|-------------------|
| H | 5.73015716798300 | -8.51324193212832  | -0.79723977767331 |
| H | 4.41517995888855 | -6.43899281918971  | -0.33207624578694 |
| H | 4.22119089830538 | -4.72441753050696  | -2.13696394537510 |
| H | 7.09353635226571 | -9.83573650897925  | -2.36309568922539 |
| H | 8.14260918336463 | -10.07797395545169 | -4.59085831627293 |
| H | 7.85917814141751 | -8.30223065338105  | -6.29101088043929 |
| H | 6.53673561761166 | -6.29128428679756  | -5.80438714646416 |
| C | 4.01816850530862 | -4.79036284705412  | -5.26365860978196 |
| C | 5.09169211321555 | -4.73997395575539  | -4.49941078097507 |
| C | 6.16981331886461 | -3.75624087761023  | -4.47452709274814 |
| C | 7.30152085906358 | -3.68529178138827  | -3.68397488745174 |
| H | 7.57958486341086 | -4.38992011459614  | -2.91643484827356 |
| C | 8.01652643089001 | -2.52416995020488  | -4.07593322218133 |
| H | 8.94647084984515 | -2.16708029300227  | -3.66616268942093 |
| C | 7.29906629929834 | -1.93087958698465  | -5.08708253115464 |
| H | 7.48850677316980 | -1.03633273306026  | -5.65548496682707 |
| N | 6.18783700322807 | -2.68441451102337  | -5.32022959281818 |
| H | 5.46183625870406 | -2.47733011444493  | -5.99982505953423 |
| O | 3.75162902608019 | -2.53158852642305  | -7.04256897944650 |
| H | 3.15120399441098 | -1.89689979090508  | -6.64023955091995 |
| H | 3.70599985352671 | -3.33873294490870  | -6.46402622109310 |

**TS<sub>A-B</sub>**; E\_CEPA = -1031.045488866601; E\_M06-2X = -1032.57600011; ZPVE\_corr = 0.32057390; Q\_corr = 0.01901752; H\_corr = 0.00094421; G\_corr = 0.27490545; -1646.12 cm<sup>-1</sup> \*\*\*imaginary mode\*\*\*

|   |                   |                   |                   |
|---|-------------------|-------------------|-------------------|
| C | 1.91649795523639  | -5.00879841611081 | -3.49693201119649 |
| C | 0.72329109566903  | -5.48962724708369 | -2.95985539976642 |
| C | 2.07867620566051  | -4.96423196866048 | -4.88079485255644 |
| C | -0.29490601894227 | -5.92123337366730 | -3.79568304108863 |
| C | 1.06062330632116  | -5.39991390369505 | -5.71821151370424 |
| C | -0.12636466226119 | -5.87788920675708 | -5.17629228412554 |
| H | 0.60738325032766  | -5.52089245974660 | -1.88500473341381 |
| H | 3.00301391022997  | -4.58705851455095 | -5.30034670201317 |
| H | -1.21970645731513 | -6.29274030607833 | -3.37477685058268 |
| H | 1.19207673135775  | -5.36523011161221 | -6.79138910680145 |
| H | -0.92077570502546 | -6.21623557577656 | -5.82853408545213 |
| C | 3.01683674257417  | -4.57869421471607 | -2.57157150066788 |
| O | 2.87302974786629  | -4.67745388952623 | -1.35615081380985 |
| C | 4.20589186895083  | -4.01211195069690 | -3.16874085123762 |
| C | 5.39788518665890  | -4.58000587287608 | -3.27819097294597 |
| C | 6.41756070973042  | -3.78270317878784 | -3.97042064886044 |
| C | 7.77190758987574  | -3.80941883662901 | -4.24595345309743 |
| H | 8.46918408304713  | -4.59683883941759 | -4.00560846507704 |
| C | 8.04691022520499  | -2.57503016460697 | -4.89369065737335 |
| H | 9.00145948765018  | -2.23859476916706 | -5.26780377005803 |
| C | 6.84601174234463  | -1.88078263639726 | -4.96757626615934 |
| H | 6.64638675977670  | -0.91237050929952 | -5.39896581618275 |
| N | 5.85877248233331  | -2.63059094566337 | -4.41556949910715 |
| H | 4.67430096283484  | -2.85847022856047 | -3.91862099903727 |
| C | 6.24107722374591  | -8.22295061500632 | -3.22908661458924 |
| C | 6.41241555472631  | -8.40041608811944 | -1.84051856824638 |
| C | 6.23462081187915  | -7.34908448493975 | -0.98328495673221 |

|   |                  |                    |                   |
|---|------------------|--------------------|-------------------|
| C | 5.90174658759151 | -6.10132872175395  | -1.50882561187754 |
| N | 5.74282670049875 | -5.91451037339629  | -2.81240369817044 |
| C | 5.88809199367118 | -6.94585320842090  | -3.71847396201910 |
| C | 6.39564157499504 | -9.28753224176243  | -4.14807208376346 |
| C | 6.19534710750150 | -9.07831480128099  | -5.48235408747558 |
| C | 5.82598000945608 | -7.79925515605808  | -5.95150570689495 |
| C | 5.67139615386040 | -6.74278855137521  | -5.09428889822377 |
| H | 6.68243333170694 | -9.38060404779488  | -1.46821622523485 |
| H | 6.35363290088184 | -7.45060436032336  | 0.08419596533467  |
| H | 5.76533735101682 | -5.22689371454602  | -0.88974412192581 |
| H | 6.66881365846818 | -10.26197310571498 | -3.76520987556637 |
| H | 6.31143327245602 | -9.89089888545775  | -6.18578214543095 |
| H | 5.65919700168566 | -7.64979885537340  | -7.00948521137698 |
| H | 5.38399470875152 | -5.76830489759212  | -5.46047964449144 |

**TS<sub>A-B</sub>-H<sub>2</sub>O**; E\_CEPA = -1107.461955422994; E\_M06-2X = -1109.05358849;  
 ZPVE\_corr = 0.34486779; Q\_corr = 0.02153297; H\_corr = 0.00094421; G\_corr =  
 0.29674059; -1375.38 cm<sup>\*\*</sup>-1 \*\*\*imaginary mode\*\*\*

|   |                   |                    |                   |
|---|-------------------|--------------------|-------------------|
| C | 1.92381967967042  | -5.38570757709355  | -3.70421154528987 |
| C | 0.99699232783029  | -6.28844167069207  | -3.18271609698355 |
| C | 1.85326900001754  | -5.02522540638645  | -5.04944863062586 |
| C | 0.01131049865042  | -6.82370027848206  | -3.99582366271599 |
| C | 0.86299185413425  | -5.55972399937350  | -5.86303899987889 |
| C | -0.05665247385292 | -6.45872086256355  | -5.33738086453549 |
| H | 1.06453667603765  | -6.56485928811535  | -2.13921750793228 |
| H | 2.56720402215976  | -4.32036903050081  | -5.45624507079940 |
| H | -0.70429116795735 | -7.52546525778941  | -3.58864082633703 |
| H | 0.80863935677159  | -5.27478035387108  | -6.90510366771446 |
| H | -0.82755687285930 | -6.87598751564320  | -5.97186178361557 |
| C | 2.99678474261854  | -4.84771473454489  | -2.81036892740765 |
| O | 3.00243987626538  | -5.11916304337110  | -1.61650198343278 |
| C | 6.07454210210864  | -7.97170736225715  | -3.17586571974636 |
| C | 6.43825830855910  | -8.02695924179244  | -1.81425918440250 |
| C | 6.42674137219974  | -6.89254037177481  | -1.04941116114470 |
| C | 6.05021250373923  | -5.68723036614116  | -1.64161437618022 |
| N | 5.70832016890055  | -5.61780148802356  | -2.91860752188566 |
| C | 5.70070095445433  | -6.72902683758602  | -3.73435434162275 |
| C | 6.06693011138378  | -9.12122387541810  | -4.00073067116426 |
| C | 5.70195837638142  | -9.02369793982364  | -5.31279427195280 |
| C | 5.33030845077170  | -7.77383506501373  | -5.85390095137368 |
| C | 5.32549955932624  | -6.63869719491397  | -5.08841934123755 |
| H | 6.72409190244642  | -8.98052085857501  | -1.38843827530769 |
| H | 6.69638019699046  | -6.90000623157919  | -0.00476040992421 |
| H | 6.01779459065577  | -4.75646834476154  | -1.09363788264762 |
| H | 6.35386257349709  | -10.06905736748983 | -3.56477051374259 |
| H | 5.69454631428752  | -9.90102543217037  | -5.94422109425260 |
| H | 5.04291703459203  | -7.70993536164998  | -6.89456992050439 |
| H | 5.03720656839340  | -5.68662144803598  | -5.50939882167527 |
| C | 4.00023996332762  | -3.96832420649927  | -3.41458074138550 |
| C | 5.28285230915099  | -4.31281717861643  | -3.45152840053500 |
| C | 6.39360178256453  | -3.56516486245886  | -4.01683278097561 |
| C | 7.74411139103576  | -3.86836607335795  | -4.06763080275346 |

|   |                  |                   |                   |
|---|------------------|-------------------|-------------------|
| H | 8.20910332648661 | -4.75644453445450 | -3.66954056990893 |
| C | 8.38127105807467 | -2.79478907988272 | -4.73385024216817 |
| H | 9.43238536249800 | -2.69703489628009 | -4.94809802747654 |
| C | 7.39765931583136 | -1.88520052652508 | -5.06275809472205 |
| H | 7.46422470413543 | -0.93953598350042 | -5.57420624428517 |
| N | 6.20291349432610 | -2.35906927276850 | -4.62754311996251 |
| H | 5.26018645525217 | -1.91994930576373 | -4.72238491449949 |
| O | 3.57558485958974 | -1.72705646572928 | -4.68181623922051 |
| H | 3.27094158730810 | -1.04668345828124 | -4.07524925495140 |
| H | 3.68210962024478 | -2.83064399244787 | -4.00030771912167 |

**B**; E\_CEPA = -1031.109522422710; E\_M06-2X = -1032.63979357; ZPVE\_corr = 0.32560782; Q\_corr = 0.01912034; H\_corr = 0.00094421; G\_corr = 0.27993926

|   |                   |                    |                   |
|---|-------------------|--------------------|-------------------|
| C | 1.58587811312790  | -5.39164522586197  | -4.00896839331337 |
| C | 0.57704776405790  | -6.06362086671939  | -3.31756010007266 |
| C | 1.24360021208692  | -4.58071903255502  | -5.09105921043348 |
| C | -0.75010251741984 | -5.91714921815178  | -3.68900871660784 |
| C | -0.08496396441695 | -4.44640606765364  | -5.47331249833957 |
| C | -1.08354034896936 | -5.10868015180267  | -4.77083189201541 |
| H | 0.84843942920499  | -6.69695447153454  | -2.48407721127065 |
| H | 2.00820995241781  | -4.06764655727403  | -5.65789852937749 |
| H | -1.52514825084768 | -6.43385206698132  | -3.13870129202114 |
| H | -0.33849154676655 | -3.82502225149229  | -6.32171969004399 |
| H | -2.11857087747732 | -4.99764356556365  | -5.06617452056409 |
| C | 3.00605910214139  | -5.60940715506653  | -3.56943279630818 |
| O | 3.27320603434645  | -6.61370572096596  | -2.90972052559213 |
| C | 3.97976827325466  | -4.60281025793034  | -3.94299213280442 |
| C | 5.31786579388718  | -4.66593559309544  | -3.70319957231343 |
| C | 6.30891244673560  | -3.72317705813082  | -4.04910392326517 |
| C | 7.70751318741252  | -3.82255430757981  | -3.82222798851511 |
| H | 8.22752220492213  | -4.63543570182264  | -3.33755800962592 |
| C | 8.25419605478591  | -2.66815244638603  | -4.35178908664941 |
| H | 9.29367657159148  | -2.38073065190702  | -4.37065510354963 |
| C | 7.15988007267177  | -1.93095024971790  | -4.87322559391150 |
| H | 7.20614944384141  | -0.96862089001729  | -5.36610988889985 |
| N | 5.99840585845711  | -2.55198487177165  | -4.69822261224329 |
| C | 6.62770486305859  | -8.10025131165640  | -3.02502317424438 |
| C | 6.74591585508852  | -8.02592285145044  | -1.62241104196454 |
| C | 6.42168264112215  | -6.87173953323583  | -0.96154945874940 |
| C | 5.96359413665123  | -5.78344660028790  | -1.70070856203044 |
| N | 5.84384357638128  | -5.84184772817973  | -3.01651184849386 |
| C | 6.16381981617354  | -6.97059841859057  | -3.73403275844514 |
| C | 6.96049667571313  | -9.27089224530390  | -3.74744425726516 |
| C | 6.83268581279683  | -9.29957564842541  | -5.10605528454330 |
| C | 6.36967008714280  | -8.15904684634651  | -5.79831696350397 |
| C | 6.03763380404590  | -7.00842116036634  | -5.13521690064505 |
| H | 7.09920155141733  | -8.89445826842838  | -1.08095216309657 |
| H | 6.50405983423833  | -6.77924610548571  | 0.11013430589763  |
| H | 5.67507092514836  | -4.84875184237247  | -1.24053752735739 |
| H | 7.31551078137896  | -10.13185971457230 | -3.19657341209423 |
| H | 7.08670035777431  | -10.19262589531961 | -5.65966378738722 |
| H | 6.27589049549124  | -8.19366597388763  | -6.87514246705980 |

H 5.68596385975444 -6.14057129134169 -5.67334672793586  
H 3.64434857157719 -3.71184985276700 -4.44959504134329

**B**-H<sub>2</sub>O; E\_CEPA = -1107.497577822291; E\_M06-2X = -1109.09083463; ZPVE\_corr = 0.34984966; Q\_corr = 0.02229188; H\_corr = 0.00094421; G\_corr = 0.30082065

C 1.57437502634520 -5.41120400908069 -3.95764184815435  
C 0.58215690301884 -6.18044750363856 -3.34757915727623  
C 1.20795882095245 -4.46911887102403 -4.92045586363043  
C -0.75094765301066 -6.00738927371790 -3.68250040741225  
C -0.12783985946042 -4.30520921520829 -5.26427574423058  
C -1.10868790120854 -5.06843629650287 -4.64466221920007  
H 0.87218267361799 -6.91134438313816 -2.60542460157067  
H 1.95286566895981 -3.86574454819256 -5.42229230343579  
H -1.51195828714786 -6.60311071374957 -3.19632768373246  
H -0.40120506015622 -3.57906618992648 -6.01812426778587  
H -2.14880170639875 -4.93417035725078 -4.91103606405091  
C 3.00029719477886 -5.66037341687275 -3.55540357360936  
O 3.27541171666448 -6.68469537737165 -2.93468581807816  
C 6.69128471497439 -8.12642436351143 -2.99233884192568  
C 6.77591006217599 -8.05342598538484 -1.58730580581042  
C 6.40294390385098 -6.91158282202468 -0.93035951812180  
C 5.93306442113086 -5.83331235461172 -1.67629419667185  
N 5.84754005738084 -5.88979920426723 -2.99513358217618  
C 6.21219178804686 -7.00773355413491 -3.70864574541429  
C 7.07033532048177 -9.28553107036599 -3.71039844502611  
C 6.97005391985274 -9.31417785747276 -5.07127544195942  
C 6.48796512420867 -8.18587646092616 -5.77025747917586  
C 6.11209024475346 -7.04607807583289 -5.11176440160735  
H 7.14177314915425 -8.91342134618496 -1.04059733211706  
H 6.45734418454133 -6.82094876538220 0.14325767212038  
H 5.60954443566056 -4.90792308174908 -1.22053250564518  
H 7.43738077442395 -10.13798999226475 -3.15425493626016  
H 7.25920769462363 -10.19848203001674 -5.62163197581086  
H 6.41407738937466 -8.22135789730429 -6.84858120272393  
H 5.74538753476953 -6.18785350000997 -5.65536146797506  
C 3.98138766024083 -4.65301156138542 -3.92198063314988  
C 5.31654019575325 -4.72440975240520 -3.69326981209262  
C 6.30788204280701 -3.78473386734133 -4.06471920252528  
C 7.69791517729577 -3.84830245337220 -3.80857672265493  
H 8.22042617991736 -4.62997142266510 -3.27780330288623  
C 8.23962530291980 -2.70450265743565 -4.37545929285614  
H 9.27468579862425 -2.40221274777264 -4.38289512793515  
C 7.15276712367363 -2.00830510920802 -4.94918158400651  
H 7.18737407350697 -1.06985062158494 -5.48577993317953  
N 5.99717498720170 -2.64662494910338 -4.76774750298687  
H 4.47927212274428 -2.14322069287834 -5.53768940621979  
O 3.63721755433281 -1.90215339260356 -6.00181702071445  
H 3.12359473731744 -1.41023890726599 -5.35586501341083  
H 3.64693122130466 -3.76146416285862 -4.42733640691341

**TS<sub>B-C</sub>**; E\_CEPA = -1031.087626608169; E\_M06-2X = -1032.61850532; ZPVE\_corr = 0.32564982; Q\_corr = 0.01814381; H\_corr = 0.00094421; G\_corr = 0.28105834; -290.13 cm<sup>\*\*</sup>-1 \*\*\*imaginary mode\*\*\*

|   |                   |                    |                   |
|---|-------------------|--------------------|-------------------|
| C | 1.43900108711268  | -5.37098112957934  | -4.21720217238012 |
| C | 0.38093291044409  | -5.99114215233148  | -3.55160566371783 |
| C | 1.16660504907566  | -4.53655052447901  | -5.30094490136108 |
| C | -0.92713009147690 | -5.77010771732477  | -3.95092044699684 |
| C | -0.14374811861286 | -4.32782238353708  | -5.71119139816244 |
| C | -1.19152303933306 | -4.93825302426960  | -5.03447839483337 |
| H | 0.59963848445278  | -6.64253319284773  | -2.71646126713723 |
| H | 1.97013536019906  | -4.06266855186280  | -5.84755998298422 |
| H | -1.74166311090855 | -6.24590126135335  | -3.42130860773151 |
| H | -0.34472105781746 | -3.68825818111269  | -6.56006568502671 |
| H | -2.21223261215133 | -4.76821019066982  | -5.35064479957354 |
| C | 2.83439117821824  | -5.66695866549887  | -3.75110362064141 |
| O | 3.04370257045170  | -6.67560244560478  | -3.08796923515612 |
| C | 3.87618034337189  | -4.70847483024580  | -4.09362862346029 |
| C | 5.17366372527436  | -4.79607321331227  | -3.72579145312261 |
| C | 6.20017777336803  | -3.80858757860215  | -3.90329477333508 |
| C | 6.24951200344296  | -2.54463898232989  | -4.50176660543406 |
| H | 5.47343330203700  | -2.07978274020444  | -5.08889584800720 |
| C | 7.50052038811991  | -2.01661113315712  | -4.17027309334276 |
| H | 7.90728131894110  | -1.06554173201183  | -4.47742481754466 |
| C | 8.15010732338878  | -2.97939477955995  | -3.37815006099755 |
| H | 9.13509158094687  | -2.93393841432806  | -2.93885829905458 |
| N | 7.37736533603656  | -4.06443026902402  | -3.25204869342200 |
| C | 6.98310317284326  | -7.99053466568422  | -3.16555116638067 |
| C | 7.71489267697837  | -7.59563806624576  | -1.99803626642519 |
| C | 7.53659816955562  | -6.37848139846931  | -1.45426672460154 |
| C | 6.59499258433587  | -5.47855507670874  | -2.04486269161442 |
| N | 5.76812018813712  | -5.91199514502854  | -3.03481694927435 |
| C | 6.02473877119364  | -7.11448695071324  | -3.70636926187052 |
| C | 7.22322367082424  | -9.22314964821652  | -3.79261817369466 |
| C | 6.55247913327306  | -9.56912637117424  | -4.94188944165102 |
| C | 5.62564524657845  | -8.67522766276685  | -5.48859283809585 |
| C | 5.35632299134519  | -7.46556689025893  | -4.88348157176390 |
| H | 8.41407597736140  | -8.30094845410655  | -1.56612992172308 |
| H | 8.07323801315666  | -6.04773868799084  | -0.57818178717137 |
| H | 6.20300676882801  | -4.67580163953952  | -1.44064643449231 |
| H | 7.95801828845088  | -9.88715187524578  | -3.35538524156194 |
| H | 6.74364744270177  | -10.51728631833105 | -5.42449028917027 |
| H | 5.10379665859269  | -8.93289560548760  | -6.40047064827902 |
| H | 4.63736074669552  | -6.79349005960399  | -5.32441107821390 |
| H | 3.59569879456650  | -3.80182939118125  | -4.60846907059263 |

**C**; E\_CEPA = -1031.116276566028; E\_M06-2X = -1032.64599013; ZPVE\_corr = 0.32740525; Q\_corr = 0.018332231; H\_corr = 0.00094421; G\_corr = 0.28276480

|   |                   |                   |                   |
|---|-------------------|-------------------|-------------------|
| C | 1.44443783209271  | -5.37121567358781 | -4.30402773515941 |
| C | 0.33441263608790  | -5.84085675172354 | -3.60217377828719 |
| C | 1.25837523170460  | -4.72918849424622 | -5.52742494492251 |
| C | -0.94307035311066 | -5.65896239266585 | -4.10747425729319 |
| C | -0.02066201438240 | -4.56104180243450 | -6.04153928640154 |

|   |                   |                    |                   |
|---|-------------------|--------------------|-------------------|
| C | -1.12208350956414 | -5.01960622609537  | -5.33028157499929 |
| H | 0.48767271044685  | -6.34373581572430  | -2.65696103786351 |
| H | 2.11017815083088  | -4.37774646569423  | -6.09443333846655 |
| H | -1.80014857115837 | -6.01580029267637  | -3.55207665597782 |
| H | -0.15619702391082 | -4.07268357323387  | -6.99719414264265 |
| H | -2.11876470301708 | -4.88116059760866  | -5.72813695625323 |
| C | 2.80948518718445  | -5.61778130009665  | -3.73388299462029 |
| O | 2.96869219884576  | -6.51527840960686  | -2.91386849064247 |
| C | 3.87586880012773  | -4.72287557249387  | -4.14909385793654 |
| C | 5.17136765362741  | -4.78474316679777  | -3.74561767089093 |
| C | 6.07672762448851  | -3.65160613540615  | -3.74021270179320 |
| C | 6.18707495247274  | -2.32313263652110  | -4.09913713729573 |
| H | 5.48720913950597  | -1.75494811956553  | -4.68845947847949 |
| C | 7.41326585442239  | -1.87277451608640  | -3.55484078705431 |
| H | 7.84193222735330  | -0.89079783350576  | -3.66871743612876 |
| C | 7.99521611134269  | -2.92421897296557  | -2.86445405337864 |
| H | 8.91256136834614  | -2.98039541924939  | -2.30326604954350 |
| N | 7.18392280852484  | -3.99603094025981  | -3.02110500873064 |
| C | 7.04698522060673  | -7.96921577039903  | -3.33120485300849 |
| C | 8.16764733856687  | -7.40359618032428  | -2.59153624554379 |
| C | 8.17892138350357  | -6.13687451301623  | -2.19978434662468 |
| C | 6.97390007923792  | -5.28233843877193  | -2.35469628423414 |
| N | 5.88585848428299  | -5.84647689815778  | -3.17833754112957 |
| C | 5.95473566894728  | -7.15387050470225  | -3.69328247459279 |
| C | 7.11704881093981  | -9.27869612289242  | -3.79757568141105 |
| C | 6.15306777697242  | -9.79456658338194  | -4.64880029911729 |
| C | 5.12668305909732  | -8.96192678469534  | -5.06859002493854 |
| C | 5.02550705485836  | -7.65726523000410  | -4.60214364297858 |
| H | 9.02435003384065  | -8.04289145813970  | -2.41792028548313 |
| H | 9.02078632368230  | -5.69015700360180  | -1.68740509527645 |
| H | 6.56462083058459  | -5.05821897139822  | -1.36329774416600 |
| H | 7.96658391621289  | -9.88158302492340  | -3.50093051574326 |
| H | 6.21789719100707  | -10.81473131964196 | -5.00049655660329 |
| H | 4.38383522003493  | -9.32220461113696  | -5.76790070276930 |
| H | 4.22916558254842  | -7.03836894110121  | -4.97306755487287 |
| H | 3.59061271281432  | -3.80280753546568  | -4.63891077674525 |

**TS<sub>C-D</sub>**; E\_CEPA = -1031.092031529759; E\_M06-2X = -1032.62018816; ZPVE\_corr = 0.32556822; Q\_corr = 0.01793462; H\_corr = 0.00094421; G\_corr = 0.28133003; -205.33 cm<sup>-1</sup> \*\*\*imaginary mode\*\*\*

|   |                   |                   |                   |
|---|-------------------|-------------------|-------------------|
| C | 1.55700154550604  | -5.09963148803024 | -4.45606556391012 |
| C | 0.36076613107298  | -4.70671267810525 | -3.85784745539845 |
| C | 1.52775211010671  | -5.54104842632280 | -5.77934757251287 |
| C | -0.83299163455212 | -4.73307496478127 | -4.56669934885417 |
| C | 0.33401534905858  | -5.57883204889592 | -6.48797458773970 |
| C | -0.85053376476122 | -5.17016515810875 | -5.88574786396398 |
| H | 0.38069307583580  | -4.37944396893814 | -2.82726315833762 |
| H | 2.43868962017716  | -5.87702956909867 | -6.25739963894315 |
| H | -1.75080800335876 | -4.41569714788956 | -4.08876937022173 |
| H | 0.32758199647719  | -5.93385676530588 | -7.51036592594446 |
| H | -1.78026692744980 | -5.19910377978110 | -6.43860956777457 |
| C | 2.82424863606249  | -5.04974024117195 | -3.63664514292192 |



|   |                  |                    |                   |
|---|------------------|--------------------|-------------------|
| O | 2.71574584878023 | -5.12208889881010  | -2.37358182252839 |
| C | 4.02437272266029 | -4.94076865148946  | -4.30350248478949 |
| C | 5.25138534399306 | -4.86535722940834  | -3.53235450434110 |
| C | 5.86388498780794 | -3.69749933824185  | -3.00324899492605 |
| C | 5.72385960487829 | -2.32382304276300  | -2.88347992838279 |
| H | 4.88449354315969 | -1.73718523369772  | -3.21663103717766 |
| C | 6.88993522643399 | -1.87149991514693  | -2.24521352679605 |
| H | 7.12865903214086 | -0.85313039021652  | -1.98893113551193 |
| C | 7.71354074815512 | -2.96978918877395  | -1.99650950208607 |
| H | 8.68432028345610 | -3.02811301109486  | -1.53334772971351 |
| N | 7.07482362973297 | -4.05560200608147  | -2.46119804870547 |
| C | 7.15780762517731 | -7.82748281492668  | -4.09826688682931 |
| C | 8.40291157166874 | -7.05668870597198  | -4.03338186834586 |
| C | 8.48614644012444 | -5.93768087437659  | -3.32011967716270 |
| C | 7.28200539001445 | -5.48293609996162  | -2.54373400800365 |
| N | 6.05113776360374 | -5.88766670494953  | -3.24489287206121 |
| C | 5.96047997548491 | -7.23584347776355  | -3.67550020246238 |
| C | 7.11404670075509 | -9.13723036687110  | -4.56674929213692 |
| C | 5.91468482966373 | -9.83518779161125  | -4.59373158772772 |
| C | 4.74464008372229 | -9.23489678158206  | -4.14316127772005 |
| C | 4.75950078949788 | -7.92582424394143  | -3.67813475716038 |
| H | 9.26486777914031 | -7.44225554633390  | -4.56249803802017 |
| H | 9.39549913129072 | -5.36130042596967  | -3.21595632793540 |
| H | 7.27581804027564 | -5.92244932538788  | -1.54077292552224 |
| H | 8.02946738637396 | -9.60391213048016  | -4.90719886704985 |
| H | 5.89369785956617 | -10.85323819473675 | -4.95784827006071 |
| H | 3.81532938214768 | -9.78764745114678  | -4.14493907104484 |
| H | 3.86443631393215 | -7.44929632931296  | -3.30434959517256 |
| H | 4.12203783218704 | -4.91163959252220  | -5.37828956410265 |

**D;** E\_CEPA = -1031.128986181348; E\_M06-2X = -1032.65893636; ZPVE\_corr = 0.32750606; Q\_corr = 0.01834176; H\_corr = 0.00094421; G\_corr = 0.28283585

|   |                   |                   |                   |
|---|-------------------|-------------------|-------------------|
| C | 1.54781222037027  | -4.71598408087908 | -4.53411569359806 |
| C | 0.76664938759556  | -3.69674504110544 | -5.07833619920574 |
| C | 1.12231424041820  | -6.03798747063753 | -4.66100186527459 |
| C | -0.40838561569572 | -3.99191593550406 | -5.75255809779617 |
| C | -0.06381267426733 | -6.33321199977058 | -5.32068718078127 |
| C | -0.82721860054190 | -5.31268704296214 | -5.87328076794470 |
| H | 1.09660242365573  | -2.67242491491569 | -4.96989109890554 |
| H | 1.69857586994315  | -6.84415079490580 | -4.22672025507225 |
| H | -0.99971265302435 | -3.19404883077299 | -6.18192166840527 |
| H | -0.39138580618183 | -7.36108216023719 | -5.40176601731714 |
| H | -1.74700261636533 | -5.54508862370476 | -6.39368669351172 |
| C | 2.80607405487048  | -4.32833638706561 | -3.80244337010983 |
| O | 2.88376035076312  | -3.19651266283201 | -3.32666051285710 |
| C | 3.84650858501812  | -5.31729597215624 | -3.72243527595220 |
| C | 5.06706547176631  | -5.12485939454795 | -3.13627715325466 |
| C | 5.65811335286384  | -3.94664649045383 | -2.52092035644022 |
| C | 5.44274283710302  | -2.63732945059449 | -2.12164210410708 |
| H | 4.51879063535691  | -2.09924690745748 | -2.20231765994831 |
| C | 6.66784425912221  | -2.16963183069029 | -1.59601856901641 |
| H | 6.85785483179097  | -1.18885548379539 | -1.19302824700361 |

|   |                  |                    |                   |
|---|------------------|--------------------|-------------------|
| C | 7.59811794786749 | -3.19073278765663  | -1.68565272603497 |
| H | 8.63499678528607 | -3.23568579916297  | -1.39788750717138 |
| N | 6.96759088698044 | -4.24643102176590  | -2.24185870142168 |
| C | 7.20339516057958 | -7.65489693756789  | -4.49889492048331 |
| C | 8.30029562984808 | -6.68662086406513  | -4.56034891090152 |
| C | 8.37983115276199 | -5.68961320894736  | -3.68407765012793 |
| C | 7.33490070621431 | -5.59122315652469  | -2.60417514229186 |
| N | 6.04823392305639 | -6.09744047523106  | -3.08290727398469 |
| C | 6.06178067101738 | -7.34439759212970  | -3.74156724933859 |
| C | 7.25507657232420 | -8.87427325888778  | -5.16856252424848 |
| C | 6.20436356684630 | -9.77596934835231  | -5.08158728790961 |
| C | 5.08991928965117 | -9.46535591105386  | -4.31179660216514 |
| C | 5.01627142589630 | -8.25345620872910  | -3.63736417151647 |
| H | 9.05451009452285 | -6.82042441425716  | -5.32564141474800 |
| H | 9.18630590371914 | -4.96790877655108  | -3.67687159282337 |
| H | 7.65114416931400 | -6.14664959140099  | -1.71421009219124 |
| H | 8.13098744745130 | -9.10883800292249  | -5.76048271649340 |
| H | 6.25707718929964 | -10.72064656403492 | -5.60513354799924 |
| H | 4.27563417220193 | -10.17174675889513 | -4.22404943544679 |
| H | 4.16129307414861 | -8.02336647229035  | -3.01709314218710 |
| H | 3.67076667645129 | -6.26265037458484  | -4.20438560401325 |

E; E\_CEPA = -1432.453123448534; E\_M06-2X = -1434.58569932; ZPVE\_corr = 0.46549840; Q\_corr = 0.02692453; H\_corr = 0.00094421; G\_corr = 0.41214890

|   |                   |                   |                   |
|---|-------------------|-------------------|-------------------|
| H | 2.68705673712373  | 0.52297106821178  | -0.62686073162147 |
| C | 2.09541091191312  | -0.39625362609080 | 1.96306783966230  |
| C | 0.76267889061550  | -0.54934853927783 | 2.41390712216227  |
| C | 0.12185261981603  | 0.51850670791521  | 2.96773159494952  |
| C | 0.81745975206919  | 1.74572852810575  | 3.07792433028986  |
| N | 2.05165815946390  | 1.92833644472393  | 2.68542218121425  |
| C | 2.70506676922502  | 0.87278767834335  | 2.12103311297260  |
| C | 2.82964270497797  | -1.44990586730871 | 1.36567956265993  |
| C | 4.11720456292270  | -1.24815613636327 | 0.94965881542527  |
| C | 4.72734397860519  | 0.01791607626841  | 1.11145995101999  |
| C | 4.03916749454114  | 1.05459235687079  | 1.68041712941301  |
| H | 0.27177262742664  | -1.50955619993501 | 2.30757086112938  |
| H | -0.89962696832698 | 0.45015593798850  | 3.31514494991841  |
| H | 0.31432950238367  | 2.60224138106105  | 3.51448546054593  |
| H | 2.35140763105245  | -2.41465724562677 | 1.24722451627354  |
| H | 4.67499963820494  | -2.05544710138694 | 0.49442420981673  |
| H | 5.74596798019541  | 0.16384582444691  | 0.77733529108742  |
| H | 4.48991534143506  | 2.03027451072351  | 1.80815333436711  |
| C | -4.00488759282462 | -0.29206782813306 | 0.42655239846686  |
| C | -5.24939475935266 | 0.33613281628666  | 0.46361262890903  |
| C | -3.94097803072896 | -1.67917778349437 | 0.55610008593528  |
| C | -6.41098232016968 | -0.40723575896216 | 0.60742857420490  |
| C | -5.10277472689118 | -2.42290229168591 | 0.71883591512313  |
| C | -6.33924192748598 | -1.79009574758011 | 0.73762642611966  |
| H | -5.29307436749023 | 1.41310461578037  | 0.37303908423961  |
| H | -2.98457915798731 | -2.18589325659192 | 0.55619095500059  |
| H | -7.37212017074724 | 0.08943597785482  | 0.62106615094088  |
| H | -5.04103733990042 | -3.49700809989194 | 0.83250361371573  |

|   |                   |                   |                   |
|---|-------------------|-------------------|-------------------|
| H | -7.24403425823108 | -2.37147276054889 | 0.85659318594998  |
| C | -2.77742397681698 | 0.56967571334079  | 0.28604657591669  |
| O | -2.83072103004444 | 1.73573352870556  | 0.67822597355886  |
| C | -1.62019583044894 | -0.04081812005132 | -0.30404149951526 |
| C | -0.41155481074862 | 0.57680254289599  | -0.48146386858484 |
| C | 0.00233876573958  | 1.95078754911449  | -0.24787588442784 |
| C | -0.39272419449962 | 3.20082741253493  | 0.20241467653629  |
| H | -1.34859337674629 | 3.44359111824021  | 0.62354375005634  |
| C | 0.70526944270393  | 4.06577818569330  | 0.00522744258441  |
| H | 0.74600022380530  | 5.11386827166689  | 0.25096180409131  |
| C | 1.73859587502969  | 3.33651178506683  | -0.55907964507458 |
| H | 2.73224818280743  | 3.62483545606022  | -0.85871816207103 |
| N | 1.29113493691071  | 2.07209399564920  | -0.70321282011634 |
| C | 1.47879994670950  | -1.44811223320078 | -2.78891685362528 |
| C | 2.03556389462295  | -0.23879415391592 | -3.39953142611973 |
| C | 2.19458563482429  | 0.87296232964144  | -2.68704221140742 |
| C | 1.82742999990761  | 0.84386070527550  | -1.22742066021161 |
| N | 0.69828647080947  | -0.05696222007802 | -1.00053377813589 |
| C | 0.79530281780530  | -1.34282905797154 | -1.56495225717871 |
| C | 1.59842534525641  | -2.69949926351573 | -3.38745470324557 |
| C | 1.06623286802287  | -3.82926803389846 | -2.78349691015978 |
| C | 0.41212822053932  | -3.71484213428692 | -1.56254441682704 |
| C | 0.27739817314513  | -2.47636032892570 | -0.94930717924816 |
| H | 2.33066576173261  | -0.28488242712344 | -4.44032325987526 |
| H | 2.62244799480222  | 1.78201081064272  | -3.08917457352958 |
| H | 2.11532347257846  | -2.77727507996972 | -4.33586866877116 |
| H | 1.16715853193087  | -4.79560831900638 | -3.25807403782543 |
| H | 0.01171118903541  | -4.59361536542299 | -1.07548116763788 |
| H | -0.20745530033843 | -2.39511305328947 | 0.01341947537874  |
| H | -1.71637113091104 | -1.05588872757497 | -0.64618635542589 |

**TS<sub>E-F</sub>**; E\_CEPA = -1432.397359824623; E\_M06-2X = -1434.53850405; ZPVE\_corr = 0.46018508; Q\_corr = 0.02659783; H\_corr = 0.00094421; G\_corr = 0.40709311; -1124.01 cm<sup>\*\*</sup>-1 \*\*\*imaginary mode\*\*\*

|   |                   |                   |                  |
|---|-------------------|-------------------|------------------|
| H | 2.43488952792486  | 1.55830957288877  | 2.98330367287294 |
| C | -0.04832964521425 | 1.63907534350908  | 5.37177641276811 |
| C | -0.70269159377375 | 2.81788898104982  | 4.94965085827353 |
| C | -0.20841413223292 | 3.54779822149466  | 3.90194580854763 |
| C | 0.95089819960376  | 3.09689952173857  | 3.25492904515744 |
| N | 1.57445567602779  | 2.00955907869846  | 3.65177254600227 |
| C | 1.12509150364039  | 1.25076467141180  | 4.69018332227679 |
| C | -0.51415358190832 | 0.83164537705433  | 6.43664758073684 |
| C | 0.16695347886993  | -0.30057076666978 | 6.78561224375834 |
| C | 1.34558657927063  | -0.67226943654185 | 6.09725143433998 |
| C | 1.82776523942880  | 0.08717832932106  | 5.06694454486091 |
| H | -1.60310163787450 | 3.13008608255318  | 5.46389394788783 |
| H | -0.69174138501573 | 4.44908227080643  | 3.55675338431163 |
| H | 1.37475221423043  | 3.61768551941859  | 2.40287550681703 |
| H | -1.41316996019507 | 1.12931422152729  | 6.96066882238215 |
| H | -0.19008774122892 | -0.91994548742511 | 7.59683023709687 |
| H | 1.87377357834451  | -1.56832576581047 | 6.39438418683500 |
| H | 2.73581417145534  | -0.18183552535109 | 4.54132982866947 |

|   |                   |                   |                   |
|---|-------------------|-------------------|-------------------|
| C | -1.52624853228177 | 0.14135333361241  | -2.18535138353443 |
| C | -1.90378568563480 | 0.51055435332527  | -3.47603941151139 |
| C | -2.17055630083569 | -0.93901535385176 | -1.58170481397671 |
| C | -2.88530299234724 | -0.19416523969462 | -4.15850613755987 |
| C | -3.16457462421395 | -1.63621777669805 | -2.25648769626159 |
| C | -3.52014601592976 | -1.27051495512390 | -3.54914537621745 |
| H | -1.41371993294406 | 1.35654808787679  | -3.93871489380555 |
| H | -1.91635265671041 | -1.22786325996636 | -0.57003368435468 |
| H | -3.15754935484219 | 0.09667849886378  | -5.16475109416305 |
| H | -3.66399970112776 | -2.46403113863445 | -1.77033964683391 |
| H | -4.29045457260602 | -1.81775275483316 | -4.07645986259872 |
| C | -0.45790052001039 | 0.95537170243797  | -1.49105132519240 |
| O | -0.32231913765788 | 2.14351232494798  | -1.83769587058143 |
| C | 0.30439372846791  | 0.28834082620106  | -0.50669576071750 |
| C | 1.37060449840003  | 0.84281436525581  | 0.20776719126649  |
| C | 2.03385462673809  | 2.12103508526690  | 0.07053781267627  |
| C | 2.01886310768283  | 3.36032919618162  | -0.56970090678496 |
| H | 1.29240169907716  | 3.68039572191026  | -1.29086745526979 |
| C | 3.12682511608483  | 4.07434131553760  | -0.07983464079199 |
| H | 3.42278449774890  | 5.06960226947614  | -0.36908625607208 |
| C | 3.79485028144071  | 3.28220167016723  | 0.84843983949614  |
| H | 4.66908489352568  | 3.47026773399395  | 1.44774011584446  |
| N | 3.12069075193172  | 2.11247589841837  | 0.92240503108695  |
| C | 2.94570927113410  | -1.75188074544655 | 2.28601580233753  |
| C | 4.25598377567112  | -1.11667739770659 | 2.24974339660163  |
| C | 4.34441381204084  | 0.20149613334600  | 1.98953509332559  |
| C | 3.14498674460989  | 0.95994760486958  | 1.73745192499066  |
| N | 2.05154770617077  | 0.19169718079620  | 1.18925474930836  |
| C | 1.81525334770755  | -1.06521819844097 | 1.79447199316969  |
| C | 2.75203948160716  | -2.99996324222529 | 2.88094900443737  |
| C | 1.48382796720307  | -3.54145406545821 | 3.02091885098447  |
| C | 0.37582002235655  | -2.82661031821245 | 2.58127421155911  |
| C | 0.53931989525130  | -1.59008938861184 | 1.97102338969022  |
| H | 5.12295651970486  | -1.69982467724725 | 2.52785079588507  |
| H | 5.28559568157509  | 0.73511639216388  | 2.04316247020587  |
| H | 3.61748482728009  | -3.53458463977572 | 3.25270604701944  |
| H | 1.35705192148929  | -4.50863941058434 | 3.48841562993343  |
| H | -0.62069650696332 | -3.22389175595522 | 2.71822605926220  |
| H | -0.32652320414911 | -1.02501983047402 | 1.65972241791018  |
| H | 0.09649907200173  | -0.75325675538187 | -0.33929599435861 |

**TS<sub>E1-F</sub>**; E\_M06-2X = -2065.25358914; ZPVE\_corr = 0.64892507; Q\_corr = 0.03871066;  
H\_corr = 0.00094421; G\_corr = 0.58434219; -1385.67 cm<sup>-1</sup> \*\*\*imaginary mode\*\*\*

|   |                   |                    |                  |
|---|-------------------|--------------------|------------------|
| C | 10.50537369938316 | -8.52816165125372  | 4.90918563097931 |
| C | 10.06512301739776 | -9.14159035513981  | 6.08283682759845 |
| C | 10.41002098522750 | -9.21898510043678  | 3.70112722847074 |
| C | 9.52464496907917  | -10.41676493960115 | 6.04930193762428 |
| C | 9.88318580414692  | -10.50367599705165 | 3.67080020739882 |
| C | 9.43438955227759  | -11.10104788928024 | 4.84135640263103 |
| H | 10.14820303811976 | -8.60296094579747  | 7.01680363540323 |
| H | 10.76683965353232 | -8.77882948091409  | 2.77969211186403 |
| H | 9.17522174240628  | -10.87966523432452 | 6.96242163853685 |

|   |                   |                    |                   |
|---|-------------------|--------------------|-------------------|
| H | 9.82430835502795  | -11.03708999512443 | 2.73170268498802  |
| H | 9.01720341875042  | -12.09901340165998 | 4.81412807278454  |
| C | 11.09777722476226 | -7.15486192670067  | 5.01791267048809  |
| O | 11.52408751612587 | -6.76340096699623  | 6.09531940816269  |
| C | 11.12882340178307 | -6.33806618314687  | 3.81399070697462  |
| C | 11.59067723538140 | -5.06723641242294  | 3.77978729319028  |
| C | 12.06847901082170 | -4.18287560500035  | 4.82812326916117  |
| C | 12.44509900465644 | -4.06633301328125  | 6.15025717266984  |
| H | 12.44679567166377 | -4.85234980999907  | 6.87940440396061  |
| C | 12.82439344255548 | -2.71202720967010  | 6.35116949438116  |
| H | 13.16693451364938 | -2.28062077943906  | 7.27650974903020  |
| C | 12.67204762899372 | -2.02946984694988  | 5.16734474276026  |
| H | 12.84170278351513 | -0.99911616359820  | 4.90343467192552  |
| N | 12.20752338723251 | -2.93391503871247  | 4.25737488661944  |
| C | 10.41235361079183 | -3.52369083066191  | 0.64888633572477  |
| C | 10.46577831284252 | -2.17783717521224  | 1.17007592473464  |
| C | 11.24720105367418 | -1.87248229667189  | 2.21766289935810  |
| C | 11.93557803622187 | -2.94942842725500  | 2.89370813565169  |
| N | 11.57652106228878 | -4.25942298334170  | 2.61384586918970  |
| C | 11.05556181193736 | -4.56495156549895  | 1.34193146186004  |
| C | 9.81085977645232  | -3.80327240276475  | -0.58007489105811 |
| C | 9.89707613201313  | -5.06511658338148  | -1.13628125494335 |
| C | 10.61539688155104 | -6.06118144823864  | -0.47845558517852 |
| C | 11.19584989255993 | -5.81877128625779  | 0.75625742720316  |
| H | 9.90678559108069  | -1.40503390292475  | 0.65722587468903  |
| H | 11.37739749499240 | -0.86881508439898  | 2.59696827089294  |
| H | 13.33133158401862 | -2.84015786506148  | 2.36445103668689  |
| H | 9.30295876339486  | -3.00222889438795  | -1.10179391964849 |
| H | 9.43604560008412  | -5.27060154648378  | -2.09233929577937 |
| H | 10.73363761084172 | -7.03486682350542  | -0.93384978493304 |
| H | 11.78361782408236 | -6.58631409124538  | 1.23718339100534  |
| H | 10.70270745648040 | -6.75329422297152  | 2.92018903734082  |
| C | 12.23450040295376 | -0.69183457180501  | -1.08305941365376 |
| C | 11.53030870288787 | -1.31893695568084  | -2.10972056584701 |
| C | 11.90124399753033 | 0.61495567255771   | -0.72702489061657 |
| C | 10.51558206726318 | -0.65057886960931  | -2.77802840380698 |
| C | 10.87290453683075 | 1.27840869592999   | -1.38337157000273 |
| C | 10.18177325768726 | 0.64905907645275   | -2.41193562276868 |
| H | 11.78601062211289 | -2.33727590540677  | -2.37002111873873 |
| H | 12.42113662651510 | 1.10943353384337   | 0.08293745865551  |
| H | 9.98020273366286  | -1.14304531538483  | -3.57917883868119 |
| H | 10.60923839783170 | 2.28571376767206   | -1.08975838718708 |
| H | 9.38414175177626  | 1.16927765968488   | -2.92577028735191 |
| C | 13.27866942268579 | -1.48547732722224  | -0.35084281499229 |
| O | 13.17959367370021 | -2.71302724763031  | -0.34194950862348 |
| C | 14.34513355357011 | -0.74198181549911  | 0.28239351307365  |
| C | 15.33742044402191 | -1.27867105640791  | 1.05097086720751  |
| C | 16.43595134565552 | -0.58424516571159  | 1.61118124563728  |
| C | 17.46907781585016 | -1.13702973773709  | 2.41155850490897  |
| H | 17.56407621223682 | -2.17048317970845  | 2.71002187276389  |
| C | 18.31359194758087 | -0.08338450114576  | 2.71710353108771  |
| H | 19.21485315578133 | -0.11109842072797  | 3.30943536657207  |

|   |                   |                   |                   |
|---|-------------------|-------------------|-------------------|
| C | 17.74762527283488 | 1.05303024659425  | 2.08655014909324  |
| H | 18.13573000750468 | 2.06330858654833  | 2.10627497220614  |
| N | 16.62990084879530 | 0.76439999726993  | 1.42592449773645  |
| C | 15.68386050711727 | -4.99481763985646 | 0.90397402271691  |
| C | 15.21075050935138 | -5.31403561198811 | 2.22120869815548  |
| C | 14.74137654652360 | -4.35529191162883 | 3.03953199937712  |
| C | 14.60640140603200 | -2.98711093752089 | 2.55838985209479  |
| N | 15.28684081704280 | -2.67990451825063 | 1.39116256134284  |
| C | 15.74251716378442 | -3.63930433529640 | 0.51884634497600  |
| C | 16.15868272239221 | -5.97925282245260 | 0.02523333048836  |
| C | 16.68155703909146 | -5.63738109485747 | -1.20097249693728 |
| C | 16.75305817292634 | -4.28571776873913 | -1.56465835328455 |
| C | 16.29647404742236 | -3.29526994730540 | -0.72373283049122 |
| H | 15.28701818732004 | -6.33980035282322 | 2.56098724758465  |
| H | 14.45275126131274 | -4.57039394573325 | 4.05786324537161  |
| H | 16.10981792587939 | -7.01470479642600 | 0.33860455972953  |
| H | 17.04292943107762 | -6.40092441599612 | -1.87535600493067 |
| H | 17.17186283385343 | -4.01007172724359 | -2.52337749270742 |
| H | 16.35107660082554 | -2.25730796969921 | -1.01977061696296 |
| H | 14.41043754801367 | 0.31885187334264  | 0.09525887752484  |
| H | 14.69162647696091 | -2.19910929463525 | 3.30865885387969  |

F; E\_CEPA = -1432.411872961265; E\_M06-2X = -1434.55698981; ZPVE\_corr = 0.46520701; Q\_corr = 0.02668205; H\_corr = 0.00094421; G\_corr = 0.41287675

|   |                   |                   |                   |
|---|-------------------|-------------------|-------------------|
| H | 2.63781507480620  | 2.19782998919796  | 1.00504062538909  |
| C | 2.19822552750545  | -0.99747524955501 | 1.69342063299497  |
| C | 0.85514830817962  | -0.89283801535441 | 2.13641413767032  |
| C | 0.21519327715178  | 0.31522981811422  | 2.15246691783853  |
| C | 0.90674516886253  | 1.45193508771397  | 1.72176007586379  |
| N | 2.15878687334508  | 1.35308557501057  | 1.30162690056273  |
| C | 2.85697187868058  | 0.17067694609260  | 1.26010999751945  |
| C | 2.89921779494179  | -2.21971137441522 | 1.64453935634704  |
| C | 4.19333909631044  | -2.25299574227159 | 1.19381176731400  |
| C | 4.83554582606954  | -1.07243291600458 | 0.77397412532797  |
| C | 4.18077370769254  | 0.13342822559481  | 0.79862817954815  |
| H | 0.34226084396889  | -1.79225972178380 | 2.45400252958716  |
| H | -0.81897535030392 | 0.42914227954799  | 2.44328082011104  |
| H | 0.46878310828382  | 2.43976392960956  | 1.71510240565267  |
| H | 2.39349031267064  | -3.12052779161855 | 1.96649171425067  |
| H | 4.72932670701642  | -3.19137285933466 | 1.15543601890139  |
| H | 5.85668356943329  | -1.11688213934284 | 0.42060134934917  |
| H | 4.65872524463331  | 1.04808788997932  | 0.47303910376059  |
| C | -4.08480424170925 | -0.37627855172726 | 0.66090860798314  |
| C | -5.22399629368328 | 0.19704053133738  | 1.22733897836416  |
| C | -4.15194399491477 | -1.71089194914380 | 0.25291350269588  |
| C | -6.40246133313398 | -0.52599953055811 | 1.35810855154202  |
| C | -5.32448403586680 | -2.44127563747705 | 0.39400762557132  |
| C | -6.45806528956108 | -1.85041714174355 | 0.94132226645223  |
| H | -5.17218020611711 | 1.22419210055956  | 1.56186836533394  |
| H | -3.27838129965931 | -2.19687387369054 | -0.16205055694658 |
| H | -7.27761780050399 | -0.05627119737520 | 1.78862039688197  |
| H | -5.35152429032497 | -3.47701057104055 | 0.08064254382964  |

|   |                   |                   |                   |
|---|-------------------|-------------------|-------------------|
| H | -7.37236394802970 | -2.41930207355784 | 1.04764598649822  |
| C | -2.83669226317869 | 0.47074778865129  | 0.54375685306502  |
| O | -2.71494239114551 | 1.43226252852631  | 1.35849794651792  |
| C | -1.91837010037715 | 0.11976316329476  | -0.43974217137667 |
| C | -0.76207751725426 | 0.90165789537465  | -0.74418278532318 |
| C | -0.63582743938257 | 2.31493625724550  | -0.72377475860995 |
| C | -1.28311359322279 | 3.52032556769420  | -0.44075806841846 |
| H | -2.26414292791413 | 3.62501116435433  | -0.01631489904516 |
| C | -0.36584288797025 | 4.54174536438794  | -0.76445034705803 |
| H | -0.53686901513875 | 5.60134508673229  | -0.65500633105338 |
| C | 0.81183601672055  | 3.98903026319517  | -1.24155425033190 |
| H | 1.72666425363655  | 4.43201238568964  | -1.59168488846545 |
| N | 0.62715502283315  | 2.62606558568104  | -1.21747366946309 |
| C | 2.21250770241598  | -1.05470114586295 | -1.98080655364357 |
| C | 3.00488650038534  | 0.06775303654282  | -2.36600074666939 |
| C | 2.54069046606715  | 1.33023836047952  | -2.13425736941266 |
| C | 1.28808017913404  | 1.49364852138026  | -1.56223691733616 |
| N | 0.44048534463454  | 0.43323915297317  | -1.24016617927942 |
| C | 0.93293495860910  | -0.88516305303408 | -1.38999779260817 |
| C | 2.70585739032761  | -2.36526204632324 | -2.14065718877468 |
| C | 1.99705386074184  | -3.46043606656999 | -1.70929842662655 |
| C | 0.76178320187296  | -3.27499219570887 | -1.08414345974345 |
| C | 0.23496954145595  | -2.00684728045519 | -0.92967802917747 |
| H | 3.97864800322252  | -0.10117876484670 | -2.80288092572184 |
| H | 3.11851045791710  | 2.21350773341406  | -2.37064726989968 |
| H | 3.67729882815240  | -2.48587365813554 | -2.60407345245207 |
| H | 2.40033480454527  | -4.45606987229527 | -1.83744720391592 |
| H | 0.20358081873597  | -4.12456948134848 | -0.71472549677731 |
| H | -0.70264146737230 | -1.88843842376096 | -0.41668795788885 |
| H | -2.11540201919538 | -0.74397377503906 | -1.05239775470514 |

F' (cation); E\_CEPA = -1030.366825954475; E\_M06-2X = -1031.89765697;  
 ZPVE\_corr = 0.31759304; Q\_corr = 0.01794846; H\_corr = 0.00094421; G\_corr =  
 0.27332794

|   |                   |                   |                   |
|---|-------------------|-------------------|-------------------|
| C | 1.39332130520564  | -4.69559217262080 | -4.43705196950404 |
| C | 0.48606846795231  | -3.64558650609649 | -4.59202254128896 |
| C | 1.09069087465789  | -5.94908484480306 | -4.96970104229610 |
| C | -0.69872330487251 | -3.84106988611849 | -5.28059873703487 |
| C | -0.10542174681297 | -6.14671692808855 | -5.64627585343495 |
| C | -0.99651541837789 | -5.09437770228029 | -5.80767490400505 |
| H | 0.72717381402246  | -2.67862854333105 | -4.17211225392266 |
| H | 1.76243326504229  | -6.78710556438712 | -4.84338987121404 |
| H | -1.39219361384410 | -3.02074781838304 | -5.40694639277474 |
| H | -0.33972508329017 | -7.12371642338119 | -6.04636937738003 |
| H | -1.92423652687781 | -5.24916790066591 | -6.34245255232999 |
| C | 2.64282800962860  | -4.42458076743820 | -3.66858213873866 |
| O | 2.72234837520744  | -3.46561780596853 | -2.92255121708146 |
| C | 3.77881429818285  | -5.34353922099454 | -3.84869670967130 |
| C | 4.98874930822140  | -5.10357192725389 | -3.32183096133107 |
| C | 5.55215607694490  | -3.94019930192055 | -2.66330880693532 |
| C | 5.31624966927545  | -2.71260982440925 | -2.09731655384587 |
| H | 4.35697736932596  | -2.27427279410709 | -1.90307064727714 |

|   |                  |                    |                   |
|---|------------------|--------------------|-------------------|
| C | 6.59328634543134 | -2.13835416930853  | -1.80403673496583 |
| H | 6.76019936896890 | -1.17905523744164  | -1.34429655864379 |
| C | 7.57241427681603 | -3.00554704071514  | -2.19446075654662 |
| H | 8.64642896818647 | -2.95059850485470  | -2.14936782160939 |
| N | 6.92928787278377 | -4.10582296825664  | -2.71105636180116 |
| C | 7.44480125828842 | -7.80997852662020  | -4.31675337759671 |
| C | 8.60944593837187 | -7.02909450320643  | -4.10144369513821 |
| C | 8.54079685458135 | -5.79931173481271  | -3.51975631248043 |
| C | 7.26653609930695 | -5.30030369207006  | -3.25220067897146 |
| N | 6.12987211032439 | -5.96984489538883  | -3.54332549237053 |
| C | 6.17370727523087 | -7.29654140863487  | -3.96771878730104 |
| C | 7.54702894662810 | -9.12962592066345  | -4.79894887843419 |
| C | 6.43660802582045 | -9.92693532008187  | -4.88374208646181 |
| C | 5.20017617931519 | -9.43317259698143  | -4.44474625038597 |
| C | 5.05773655311889 | -8.14142280908329  | -3.98933069459149 |
| H | 9.56921749342193 | -7.44963931208505  | -4.37351859879809 |
| H | 9.40800921205314 | -5.19919346901981  | -3.29071388057180 |
| H | 8.52598705399099 | -9.49878906973287  | -5.07472724064013 |
| H | 6.51511086608951 | -10.94127868008862 | -5.24796863191963 |
| H | 4.33489065050894 | -10.08180805743616 | -4.44412045612910 |
| H | 4.10286209198773 | -7.82375119938042  | -3.60654873275401 |
| H | 3.64914025018290 | -6.18946436388910  | -4.49731234682219 |

**B-H<sup>+</sup>**; E\_CEPA = -1031.843878156291; E\_M06-2X = -1033.37426584; ZPVE\_corr = 0.33490660; Q\_corr = 0.01968606; H\_corr = 0.00094421; G\_corr = 0.28857693

|   |                   |                   |                   |
|---|-------------------|-------------------|-------------------|
| C | 1.61867091738181  | -5.37927654324160 | -4.02193666921000 |
| C | 0.59102561920199  | -6.01703150699785 | -3.32662732593086 |
| C | 1.29466070302438  | -4.56162942035363 | -5.10459603841873 |
| C | -0.73346298739177 | -5.82935977195228 | -3.69141350365274 |
| C | -0.03079380301919 | -4.38640625177610 | -5.48206052414167 |
| C | -1.04743437722459 | -5.01401600657157 | -4.77359044488658 |
| H | 0.84604216237452  | -6.65850704110184 | -2.49406256427607 |
| H | 2.07413715558996  | -4.07473618345088 | -5.67443116317691 |
| H | -1.52159301311347 | -6.31987743980331 | -3.13542054956909 |
| H | -0.26812020346627 | -3.76014584536249 | -6.33179659098062 |
| H | -2.07984390443344 | -4.87110667719465 | -5.06449255216915 |
| C | 3.03969398834225  | -5.64172159809808 | -3.58632594588545 |
| O | 3.26829713082050  | -6.68317147315750 | -2.96721378338174 |
| C | 4.02060047831526  | -4.63765713039831 | -3.91952701774251 |
| C | 5.37058633086761  | -4.71697718309547 | -3.70267917668947 |
| C | 6.29803187078869  | -3.71063790667508 | -4.08991277898184 |
| C | 7.70172251622788  | -3.74812514289881 | -3.90333476042098 |
| H | 8.25743107243284  | -4.54545964184297 | -3.43395490672491 |
| C | 8.19040866316387  | -2.56622808917912 | -4.44117650149675 |
| H | 9.21658833314748  | -2.23529500452998 | -4.48702780003198 |
| C | 7.05463935940393  | -1.87424778188378 | -4.92619013127486 |
| H | 7.04551320111140  | -0.90803196726070 | -5.41480359612630 |
| N | 5.92338773407524  | -2.54757282324017 | -4.72137605549004 |
| C | 6.67496582733468  | -8.13739538185582 | -3.03970322276630 |
| C | 6.84727774134868  | -8.04424130062130 | -1.59382512348799 |
| C | 6.46709101069232  | -6.96371156130740 | -0.91833049550594 |
| C | 5.81752388957308  | -5.79087600544759 | -1.58153688202872 |



|   |                  |                    |                   |
|---|------------------|--------------------|-------------------|
| N | 5.94447438846320 | -5.84263481808209  | -3.03522565015813 |
| C | 6.20025901559576 | -6.99949535878426  | -3.73086719052533 |
| C | 6.98606085179966 | -9.29339955522156  | -3.74412419590737 |
| C | 6.83964267710996 | -9.36458754983008  | -5.12502483962267 |
| C | 6.37683163806898 | -8.24375818740826  | -5.80225706919456 |
| C | 6.05859740523027 | -7.07436526880851  | -5.12264874305326 |
| H | 7.29562396063722 | -8.88817863014743  | -1.08255162755898 |
| H | 6.58852548199251 | -6.90491392613125  | 0.15596148596787  |
| H | 4.75744961869716 | -5.74398916291123  | -1.29721595014056 |
| H | 7.35160003540110 | -10.14975403911525 | -3.18892426779070 |
| H | 7.08450122058606 | -10.27227227348548 | -5.65878200385879 |
| H | 6.25653145944244 | -8.27245299988610  | -6.87787282340593 |
| H | 5.69971888700861 | -6.21469653258271  | -5.67152596634445 |
| H | 3.67369973822716 | -3.73667859797085  | -4.40109413615109 |
| H | 6.28098668317020 | -4.86137879833658  | -1.23590131880779 |

**G**; E\_CEPA = -1031.115806370100; E\_M06-2X = -1032.65347960; ZPVE\_corr = 0.32700462; Q\_corr = 0.01841129; H\_corr = 0.00094421; G\_corr = 0.28259982

|   |                   |                   |                   |
|---|-------------------|-------------------|-------------------|
| C | 5.33867138472579  | -0.67307078922505 | -1.03029657627108 |
| C | 5.89943586983280  | -1.55197167497377 | -0.09930069353843 |
| C | 6.13301638944627  | 0.35946926154812  | -1.53990827057060 |
| C | 7.21036872435838  | -1.38793523248491 | 0.32664067044444  |
| C | 7.43965432444999  | 0.52307931261668  | -1.10849862401206 |
| C | 7.98503460092179  | -0.34845093187901 | -0.17151704510316 |
| H | 5.30070792486211  | -2.35942107344156 | 0.29701215135136  |
| H | 5.73626749330255  | 1.02635731552501  | -2.29336153073811 |
| H | 7.62652378720697  | -2.07484201477708 | 1.05181324940975  |
| H | 8.03945163663716  | 1.32642967939925  | -1.51540606756132 |
| H | 9.00731121217505  | -0.22239656523423 | 0.15915784850561  |
| C | 3.93574449700618  | -0.84272423548100 | -1.44587718576669 |
| O | 3.45400157687340  | -2.08652406524875 | -1.17836380888817 |
| C | 3.18856252311015  | 0.13657723594120  | -1.99190541964061 |
| C | 1.86099842466005  | -0.06515790644705 | -2.51401006973561 |
| C | 1.39239624531364  | -1.17569958462190 | -3.24823264103180 |
| C | 1.71200141295310  | -2.44080238564099 | -3.74995416767112 |
| H | 2.62392564493832  | -2.98749747181094 | -3.58785135478997 |
| C | 0.59356379352464  | -2.84547365324576 | -4.51676504980892 |
| H | 0.49998109600834  | -3.78296845316848 | -5.04198931184636 |
| C | -0.37903764341598 | -1.86668831641149 | -4.49892228916291 |
| H | -1.35108587011419 | -1.80736840998657 | -4.95355046246815 |
| N | 0.12102778204161  | -0.84800570796258 | -3.71548384776329 |
| C | -0.38020375216970 | 2.93825380439807  | -2.29052888992694 |
| C | -1.39341119523523 | 2.45360007148334  | -3.17282677983710 |
| C | -1.31908761568877 | 1.18429058473581  | -3.65259607977809 |
| C | -0.20434598831610 | 0.40686862024858  | -3.32719893847019 |
| N | 0.84396352293490  | 0.87280652541399  | -2.56431358159790 |
| C | 0.72303212085880  | 2.12583358629576  | -1.93965478361887 |
| C | -0.48209081905815 | 4.21500702271056  | -1.70396250314149 |
| C | 0.43692722424930  | 4.65340142442826  | -0.78316700216620 |
| C | 1.48359118307988  | 3.80809294114041  | -0.39517724001087 |
| C | 1.62629830557728  | 2.56014480325627  | -0.96110928287774 |
| H | -2.22667768030333 | 3.09720443149601  | -3.41709390001782 |

|   |                   |                   |                   |
|---|-------------------|-------------------|-------------------|
| H | -2.07935615634397 | 0.75556656221742  | -4.29004436859555 |
| H | 2.50554381688090  | -2.12642106039860 | -1.35625729337099 |
| H | -1.31995304975940 | 4.83900112520338  | -1.98809198361201 |
| H | 0.33979009139368  | 5.63522356955042  | -0.34047023807755 |
| H | 2.18557435067759  | 4.12667218638414  | 0.36312039729520  |
| H | 2.41755953885461  | 1.91349420987905  | -0.62173918719935 |
| H | 3.63275134454953  | 1.11657227156800  | -2.08201707233931 |

**TS<sub>G-H</sub>**; E\_CEPA = -1031.084064970887; E\_M06-2X = -1032.61746417; ZPVE\_corr = 0.32211378; Q\_corr = 0.01796397; H\_corr = 0.00094421; G\_corr = 0.27788801; -1639.91 cm<sup>-1</sup> \*\*\*imaginary mode\*\*\*

|   |                   |                   |                   |
|---|-------------------|-------------------|-------------------|
| H | -1.10593849819752 | 0.54985011324252  | 0.82711291316277  |
| C | -4.26964238329647 | -0.16854974059016 | 0.25603496952303  |
| C | -4.85899096097902 | -0.61349048191149 | 1.43868859874191  |
| C | -5.05564040673201 | -0.07316614425232 | -0.89527041259673 |
| C | -6.20413553692323 | -0.96084176474516 | 1.47162570151571  |
| C | -6.39706754275885 | -0.41845834784036 | -0.86198953064389 |
| C | -6.97669684381685 | -0.86499767392685 | 0.32246443376650  |
| H | -4.25265389773319 | -0.68538597585728 | 2.33065504540748  |
| H | -4.61884045472980 | 0.27839632943054  | -1.82038542750136 |
| H | -6.64767479217037 | -1.30559503480116 | 2.39649951609995  |
| H | -6.99468996860480 | -0.33755817388414 | -1.76038667764314 |
| H | -8.02466952531019 | -1.13316949479665 | 0.34664296065729  |
| C | -2.83208660648487 | 0.18723916695227  | 0.24466293327713  |
| O | -2.17919172328687 | 0.15867731794891  | 1.39315170086806  |
| C | -2.10486635243715 | 0.51890126127808  | -0.85503288069165 |
| C | -0.71516195312395 | 0.88734117434992  | -0.45852344319188 |
| C | -0.25798528102009 | 2.25183873265836  | -0.70583590901031 |
| C | -0.61122497078368 | 3.57321211548598  | -0.62098883676356 |
| H | -1.54065761517563 | 3.96703338456625  | -0.24757267336197 |
| C | 0.50205312992343  | 4.32364229749637  | -1.12251708891841 |
| H | 0.55886834512720  | 5.39816792846628  | -1.18931275213027 |
| C | 1.49738739033441  | 3.46699919627723  | -1.50708212421754 |
| H | 2.47560865291190  | 3.63149332664950  | -1.92211831125540 |
| N | 1.01862959603710  | 2.19687810692630  | -1.24795552443379 |
| C | 1.73449191587857  | -1.80525155262460 | -1.55522638725754 |
| C | 2.74189297949123  | -0.93324018526952 | -2.05424427212829 |
| C | 2.59913431998068  | 0.41445014759780  | -1.96668923037525 |
| C | 1.40129212105229  | 0.90543267037852  | -1.42012255119934 |
| N | 0.41537557143960  | 0.10972408441053  | -0.97879554531598 |
| C | 0.56718308625456  | -1.26367982684168 | -0.97385077355435 |
| C | 1.89113043798425  | -3.20609361535440 | -1.58430786282337 |
| C | 0.94033190866416  | -4.02554582636573 | -1.03518592416625 |
| C | -0.19098220278834 | -3.46616648073664 | -0.41624741744339 |
| C | -0.38479083482688 | -2.10625219400405 | -0.37896527602510 |
| H | 3.63517647858587  | -1.36516110666419 | -2.48628688998617 |
| H | 3.34906613906536  | 1.11175333475495  | -2.30872035388182 |
| H | 2.78478475434473  | -3.61432085381269 | -2.03845367466526 |
| H | 1.06650657167823  | -5.09902069694904 | -1.05680703005108 |
| H | -0.92059676187741 | -4.11520773102552 | 0.04892500388041  |
| H | -1.24004958615527 | -1.68620335831896 | 0.12539267425896  |
| H | -2.48584169954115 | 0.60473057170229  | -1.86162566992612 |

H; E\_CEPA = -1031.120289686410; E\_M06-2X = -1032.65133070; ZPVE\_corr = 0.32725131; Q\_corr = 0.01817296; H\_corr = 0.00094421; G\_corr = 0.28284685

|   |                   |                   |                   |
|---|-------------------|-------------------|-------------------|
| C | 1.91138075494129  | -0.28839904982904 | -0.39464471334008 |
| C | 2.90024907562729  | -0.94683655675537 | 0.33554672116685  |
| C | 2.26352465418722  | 0.85988043999654  | -1.10572545081800 |
| C | 4.21081487328446  | -0.48744765463448 | 0.33907399980641  |
| C | 3.57071569699462  | 1.32904510800307  | -1.09519904592002 |
| C | 4.55140395106175  | 0.65370137634372  | -0.37742601575150 |
| H | 2.62495002157277  | -1.82758684377317 | 0.89997636232836  |
| H | 1.50852596628757  | 1.40428140566168  | -1.65757322034956 |
| H | 4.96695430424682  | -1.01830807895136 | 0.90315357503046  |
| H | 3.82333114551235  | 2.22711534121622  | -1.64409298681753 |
| H | 5.57014840875635  | 1.01854168534210  | -0.37123744007139 |
| C | 0.50470491708221  | -0.84060653137207 | -0.36744516148365 |
| O | 0.17377888813206  | -1.52879466633362 | 0.65032434350922  |
| C | -0.31450035679115 | -0.57809709741610 | -1.44622846061772 |
| C | -1.65989165618120 | -1.18440094625288 | -1.52188156100384 |
| C | -2.03387539578145 | -1.73981434776985 | -2.86480104288403 |
| C | -1.63220459814589 | -2.61977957716499 | -3.81859049672532 |
| H | -0.77845017961936 | -3.27402625147229 | -3.77247413050501 |
| C | -2.57062225373573 | -2.50515075797245 | -4.90342744814044 |
| H | -2.54750123755012 | -3.06873114264163 | -5.82133088156472 |
| C | -3.50275048900716 | -1.56030396693005 | -4.58603465853430 |
| H | -4.35662880596301 | -1.17771037551431 | -5.11707175120059 |
| N | -3.16296019730273 | -1.09807408090266 | -3.33167436571951 |
| C | -4.15882296614677 | 1.49394230793681  | -0.33519273649770 |
| C | -4.96741908197543 | 1.51434020878706  | -1.50120921468742 |
| C | -4.71967011687102 | 0.68015425693519  | -2.54950408071698 |
| C | -3.61739503899524 | -0.17850376452059 | -2.43195015320067 |
| N | -2.82895203339922 | -0.19632514021991 | -1.36067177226125 |
| C | -3.06826052109070 | 0.59807621125407  | -0.26848301590259 |
| C | -4.42328987787243 | 2.32674020856288  | 0.77232714612411  |
| C | -3.63856170365843 | 2.25473209023212  | 1.89173554834311  |
| C | -2.56973654024487 | 1.33958902347959  | 1.94464961952987  |
| C | -2.27395883259604 | 0.51475561431734  | 0.88652784760016  |
| H | -5.80121589323721 | 2.20368331049707  | -1.54099697862074 |
| H | -5.32295130754060 | 0.65902935691499  | -3.44435940242558 |
| H | -5.25945917086475 | 3.01158431809852  | 0.71624622619801  |
| H | -3.84181628384929 | 2.89114252387445  | 2.74160157841933  |
| H | -1.96806249754979 | 1.27999883000978  | 2.84181805468217  |
| H | -1.46007568937835 | -0.19841407343454 | 0.94363844421774  |
| H | 0.03707121289579  | -0.03146201733484 | -2.30805575859166 |
| H | -1.78109014523459 | -1.91155769626701 | -0.71610652260395 |

**TS<sub>H-3a</sub>**; E\_CEPA = -1031.112694169845; E\_M06-2X = -1032.64477892; ZPVE\_corr = 0.32548791; Q\_corr = 0.01812058; H\_corr = 0.00094421; G\_corr = 0.28093165; -323.74 cm<sup>-1</sup> \*\*\*imaginary mode\*\*\*

|   |                  |                  |                  |
|---|------------------|------------------|------------------|
| C | 3.87549361642472 | 0.36797501900867 | 1.47028993660308 |
| C | 4.67561203997894 | 0.53707748958758 | 2.59972591537090 |
| C | 4.46337590384130 | 0.46557146358617 | 0.20929256958167 |
| C | 6.03603106114840 | 0.77964694071370 | 2.47606169686841 |

|   |                   |                   |                   |
|---|-------------------|-------------------|-------------------|
| C | 5.82269557615144  | 0.72205885436618  | 0.08259585588839  |
| C | 6.61377018341577  | 0.87349732981208  | 1.21490972994446  |
| H | 4.21396875897404  | 0.47241042866877  | 3.57565265217268  |
| H | 3.85913849764183  | 0.36297117106796  | -0.68185411874245 |
| H | 6.64623814004653  | 0.89802810366988  | 3.36196717024181  |
| H | 6.26356095888371  | 0.80682331460790  | -0.90197306116365 |
| H | 7.67343729439194  | 1.06856572192167  | 1.11503113502992  |
| C | 2.40228246969137  | 0.11018659542231  | 1.66874283372315  |
| O | 1.89046794150797  | 0.47963859011469  | 2.74720738043642  |
| C | 1.69753497531244  | -0.55636630041225 | 0.64301624747962  |
| C | 0.34552738672320  | -0.90572913537464 | 0.81723802324784  |
| C | -0.19634261037152 | -2.06444616898593 | 0.05757469244225  |
| C | 0.10443782008681  | -3.38370405666563 | -0.10115577735037 |
| H | 0.90805790653390  | -3.91381351944459 | 0.38156362550454  |
| C | -0.85744358849693 | -3.92364525576376 | -1.01865053768546 |
| H | -0.91006337604171 | -4.94409347005732 | -1.35965681774327 |
| C | -1.70145525992441 | -2.91955927667234 | -1.39788267071463 |
| H | -2.53798504687685 | -2.90248926211895 | -2.07437423758594 |
| N | -1.29200079625164 | -1.78797108771180 | -0.72940441238833 |
| C | -2.05302466688356 | 2.23478471361150  | -0.54959475916215 |
| C | -2.86104841355529 | 1.45753933220832  | -1.41904998195269 |
| C | -2.68676273031935 | 0.10963729991062  | -1.52371841318077 |
| C | -1.66106122172705 | -0.45983957758445 | -0.74481071372293 |
| N | -0.90187053783972 | 0.23561158264850  | 0.06704215590105  |
| C | -1.06016955854704 | 1.57742273986260  | 0.21594274095465  |
| C | -2.21306920169899 | 3.63038946837286  | -0.40716534296666 |
| C | -1.42045788673214 | 4.32904855035611  | 0.46279229487768  |
| C | -0.44668002628991 | 3.65688528068324  | 1.23112674944785  |
| C | -0.25970592258700 | 2.30298609810462  | 1.12041486721675  |
| H | -3.62632842343810 | 1.95558096136895  | -2.00111825143515 |
| H | -3.28838296238221 | -0.50863017471377 | -2.17286646413662 |
| H | -0.02514292022653 | -0.79857064345733 | 1.83397891745167  |
| H | -2.97435682934607 | 4.12852028011892  | -0.99393973507565 |
| H | -1.54298204906328 | 5.39769586148813  | 0.57231626905724  |
| H | 0.16103534567750  | 4.22163399845707  | 1.92559809858014  |
| H | 0.47232781315785  | 1.78048668294829  | 1.72372052906832  |
| H | 2.19749833900959  | -0.85719894372455 | -0.26443579208375 |

**3a**; E\_CEPA = -1031.148774212946; E\_M06-2X = -1032.67805946; ZPVE\_corr = 0.32579399; Q\_corr = 0.01917863; H\_corr = 0.00094421; G\_corr = 0.27974005

|   |                   |                   |                   |
|---|-------------------|-------------------|-------------------|
| C | -3.70638072430328 | 1.05423853934751  | -1.06939515034912 |
| C | -4.72382894895673 | 0.11828847415559  | -1.26276541965317 |
| C | -4.02339471825777 | 2.41218651890693  | -1.04699024804521 |
| C | -6.03689301643525 | 0.53030300938498  | -1.41871110359180 |
| C | -5.33818693661808 | 2.82560437846011  | -1.21919956525965 |
| C | -6.34562953093632 | 1.88705893988856  | -1.39888429604171 |
| H | -4.46961341705153 | -0.93263331160313 | -1.28270711302060 |
| H | -3.25111643515552 | 3.15763139347960  | -0.91875550308458 |
| H | -6.82086323283923 | -0.20223141470568 | -1.55642152183835 |
| H | -5.57414188097325 | 3.88117358218580  | -1.21236432291097 |
| H | -7.37039366190744 | 2.21083418420923  | -1.52480160873363 |
| C | -2.30385070916500 | 0.55112295967994  | -0.92161527601872 |

|   |                   |                   |                   |
|---|-------------------|-------------------|-------------------|
| O | -2.02622513078594 | -0.58035028450462 | -1.29120292551421 |
| C | -1.30069004571128 | 1.43756177554332  | -0.30885549132539 |
| C | -0.02075905610062 | 1.04302581074069  | -0.22914505979649 |
| C | 1.04647504859626  | 1.82998716134920  | 0.33138394601990  |
| C | 1.09304517834336  | 3.18510827275189  | 0.59604762282009  |
| H | 0.27378789105447  | 3.87042745279429  | 0.45213938010397  |
| C | 2.40038306655724  | 3.50490853343268  | 1.02014945334253  |
| H | 2.77212539352319  | 4.47347787531449  | 1.30845046756994  |
| C | 3.12814501318163  | 2.34211969070665  | 1.00223712969361  |
| H | 4.14735424440338  | 2.14898497861405  | 1.29033864510070  |
| N | 2.31539945847948  | 1.32293947791902  | 0.58592282155778  |
| C | 3.50210646328949  | -2.64856102603829 | 0.48300884940661  |
| C | 4.41565555364764  | -1.64095401252019 | 0.09025035083043  |
| C | 4.03179903163106  | -0.33557991299516 | 0.10798173471619  |
| C | 2.71583584938316  | -0.03488030655467 | 0.54501463779462  |
| N | 1.84684975098380  | -0.92542984153487 | 0.92454492058106  |
| C | 2.20919678222139  | -2.23856779159546 | 0.88618603554878  |
| C | 3.82519552108440  | -4.02472124334230 | 0.47789651549445  |
| C | 2.89378169520010  | -4.95216526318361 | 0.85805740154390  |
| C | 1.60244566805459  | -4.54136510806467 | 1.25806055072808  |
| C | 1.26370863485936  | -3.21557441699149 | 1.27364266256079  |
| H | 5.40855944825057  | -1.92241069015347 | -0.23786464251978 |
| H | 4.69046023878746  | 0.45612344516312  | -0.21734143147350 |
| H | 0.23228977991578  | 0.06947488036657  | -0.62814429286666 |
| H | 4.81790001330135  | -4.32583564704647 | 0.16732621592420  |
| H | 3.14075287766484  | -6.00511898682451 | 0.85363002937334  |
| H | 0.87634457742522  | -5.28665477449395 | 1.55435493357038  |
| H | 0.27916281963100  | -2.88524485425219 | 1.57744762039753  |
| H | -1.61679455427298 | 2.38569855501049  | 0.10109704736467  |
